# Supplementary material
Source: PubMed Central journal article supplement (PMC5004935)
Supplement: JCI86721.sd.pdf [file JCI86721.sd.pdf]

## SUPPLEMENTAL TABLES

**Supplemental Table 1: Characteristics of peripheral blood prior to electrotransfer of SB plasmids and numeric expansion on  $\gamma$ -irradiated AaPC and cytokines**

| P#   | Auto or Allo | Day 0 (Day of electroporation) |            |                      |                |                |                |
|------|--------------|--------------------------------|------------|----------------------|----------------|----------------|----------------|
|      |              | WBC [K/mL]                     | ALC [K/mL] | CD3 (ATC) [% & K/mL] | CD4 [% & K/mL] | CD8 [% & K/mL] | ABC [% & K/mL] |
| P446 | Auto         | 5.4                            | 1.46       | 81%<br>1.18          | 60%<br>0.88    | 19%<br>0.28    | ND             |
| P458 | Auto         | 9                              | 0.27       | 23%<br>0.06          | 17%<br>0.05    | 2%<br>0.005    | ND             |
| P468 | Auto         | 4.7                            | 0.9        | 17%<br>0.15          | 12%<br>0.11    | 5%<br>0.04     | ND             |
| P471 | Auto         | 11.4                           | 0.93       | 47%<br>0.44          | 35%<br>0.32    | 5%<br>0.04     | ND             |
| P509 | Auto         | 7.2                            | 1.46       | 78%<br>1.14          | 67%<br>0.98    | 9%<br>0.13     | ND             |
| P747 | Auto         | 6.1                            | 1.38       | 82%<br>1.13          | 47%<br>0.65    | 32%<br>0.44    | 0              |
| P708 | Auto         | 4.6                            | 2.78       | 88%<br>2.45          | 44%<br>1.22    | 47%<br>1.31    | 0%<br>0.05     |
| P396 | Allo         | 8.1                            | 1.54       | 58%<br>0.89          | 47%<br>0.72    | 20%<br>0.31    | 21%<br>1.7     |
| P410 | Allo         | 5.9                            | 2.81       | 70%<br>1.97          | 31%<br>0.87    | 32%<br>0.90    | ND             |
| P411 | Allo         | 4.5                            | 1.72       | 80%<br>1.38          | 48%<br>0.83    | 32%<br>0.55    | ND             |
| P513 | Allo         | 6.7                            | 2.27       | 41%<br>0.93          | 24%<br>0.54    | 15%<br>0.34    | ND             |
| P580 | Allo         | 6.1                            | 2.1        | 86%<br>1.81          | 68%<br>1.43    | 15%<br>0.32    | 5%<br>0.29     |
| P459 | Allo         | 10.6                           | 2.29       | 82%<br>1.88          | 51%<br>1.17    | 28%<br>0.64    | ND             |
| P564 | Allo         | 4.4                            | 1.3        | 64%<br>0.83          | 52%<br>0.68    | 12%<br>0.16    | 18%<br>0.81    |
| P617 | Allo         | 7.1                            | 1.55       | 82%<br>1.27          | 61%<br>0.94    | 17%<br>0.26    | 8%<br>0.58     |
| P671 | Allo         | 5.4                            | 1.7        | 78%<br>1.33          | 53%<br>0.90    | 24%<br>0.41    | 3%<br>0.17     |
| P723 | Allo         | 8.6                            | 2.61       | 69%<br>1.80          | 50%<br>1.30    | 20%<br>0.52    | 7%<br>0.59     |
| P732 | Allo         | 6.7                            | 1.68       | 78%<br>1.31          | 52%<br>0.87    | 22%<br>0.37    | 6%<br>0.39     |
| P641 | Allo         | 9.0                            | 2.13       | 74%<br>1.58          | 57%<br>1.21    | 15%<br>0.32    | 9%<br>0.78     |
| P647 | Allo         | 12.1                           | 2.29       | 73%<br>1.67          | 54%<br>1.24    | 18%<br>0.41    | 9%<br>1.11     |

|      |      |      |      |             |             |             |            |
|------|------|------|------|-------------|-------------|-------------|------------|
| P716 | Allo | 3.0  | 1.83 | 75%<br>1.37 | 59%<br>1.08 | 11%<br>0.20 | 0          |
| P718 | Allo | 6.2  | 1.99 | 87%<br>1.73 | 73%<br>1.45 | 12%<br>0.24 | 1%<br>0.07 |
| P771 | Allo | 13.1 | 3.23 | 83%<br>2.68 | 69%<br>2.23 | 13%<br>0.42 | 6%<br>0.79 |
| P783 | Allo | 8.1  | 1.54 | 73%<br>1.12 | 42%<br>0.65 | 27%<br>0.42 | 6%<br>0.52 |

WBC = white blood cell count (automated complete blood counts)

ALC = absolute lymphocyte count (automated complete blood counts)

ATC = absolute T-cell count (ALC x %CD3)

CD4 & CD8 = ALC x %(CD4 or CD8)

ABC = absolute B-cell count (ALC x %CD19)

ND = not detected

% CD3, %CD4, %CD8 and %CD19 (ABC) were calculated from lymphocyte gate (FSC/SSC) using flow cytometry

**Supplemental Table 2: Characterization of T cells during and after SB electrotransfer and expansion on AaPC/cytokines**

| UPN  | Auto or Allo | Day 1 after electroporation (%)* |     | Day 7 of co-culture (%) |     | Day 14 of co-culture (%) |     | Day 21 of co-culture (%) |     | Day 28 of co-culture (%) |     |     |     | **CD56 depletion | SB11 PCR      |        |        |        | G-banding Karyotype |
|------|--------------|----------------------------------|-----|-------------------------|-----|--------------------------|-----|--------------------------|-----|--------------------------|-----|-----|-----|------------------|---------------|--------|--------|--------|---------------------|
|      |              | CD3                              | CAR | CD3                     | CAR | CD3                      | CAR | CD3                      | CAR | CD3                      | CAR | CD4 | CD8 |                  | GAPDH Control | Day 14 | Day 21 | Day 28 |                     |
| P446 | Auto         | 83                               | 67  | 79                      | 43  | 99                       | 65  | 99                       | 85  | 99                       | 88  | 6   | 95  | Days 7, 10       | +             |        |        | -      | Normal              |
| P458 | Auto         | 48                               | 47  | 87                      | 44  | 99                       | 93  | 99                       | 85  | 99                       | 77  | 38  | 47  | Day 9            | +             |        |        | -      | Normal              |
| P468 | Auto         | 61                               | 38  | 86                      | 34  | 97                       | 79  | 97                       | 69  | 98                       | 86  | 1   | 91  | Day 10           | +             |        |        | -      | Normal              |
| P471 | Auto         | 84                               | 38  | 75                      | 34  | 99                       | 53  | 99                       | 89  | 99                       | 96  | 7   | 87  | None             | +             |        |        | -      | Normal              |
| P509 | Auto         | 90                               | 38  | 79                      | 57  | 97                       | 85  | 99                       | 87  | 99                       | 96  | 10  | 84  | None             | +             |        |        | -      | Normal              |
| P747 | Auto         | 90                               | 75  | 96                      | 26  | 80                       | 40  | 97                       | 79  | 99                       | 88  | 3   | 86  | Day 15           | +             |        | +      | -      | ND                  |
| P708 | Auto         | 78                               | 87  | 73                      | 18  | 86                       | 46  | 99                       | 78  | 100                      | 91  | 3   | 95  | Days 7, 14       | +             |        |        | -      | ND                  |
| P396 | Allo         | 84                               | 55  | 92                      | 78  | 97                       | 86  | 99                       | 88  | 99                       | 97  | 3   | 97  | None             | +             |        |        | -      | Normal              |
| P410 | Allo         | 61                               | 48  | 88                      | 54  | 94                       | 70  | 98                       | 84  | 99                       | 90  | 4   | 92  | None             | +             |        |        | -      | Normal              |
| P411 | Allo         | 85                               | 49  | 61                      | 59  | 81                       | 54  | 85                       | 60  | 99                       | 71  | 42  | 52  | Day 7            | +             |        |        | -      | Normal              |
| P513 | Allo         | 83                               | 29  | 69                      | 26  | 99                       | 86  | 99                       | 92  | 99                       | 88  | 1   | 96  | None             | +             |        |        | -      | ND                  |
| P580 | Allo         | 79                               | 77  | 95                      | 54  | 97                       | 78  | 97                       | 66  | 99                       | 70  | 12  | 85  | Day 14           | +             |        |        | -      | ND                  |
| P459 | Allo         | 91                               | 40  | 93                      | 39  | 96                       | 81  | 98                       | 95  | 99                       | 91  | 30  | 64  | None             | +             |        |        | -      | Normal              |
| P564 | Allo         | 74                               | 67  | 84                      | 40  | 79                       | 93  | 99                       | 92  | 99                       | 91  | 6   | 92  | Day 14           | +             |        |        | -      | ND                  |
| P617 | Allo         | 93                               | 77  | 68                      | 20  | 94                       | 50  | 97                       | 61  | 99                       | 67  | 3   | 64  | Day 7            | +             |        |        | -      | ND                  |
| P671 | Allo         | 86                               | 82  | NA                      | NA  | 81                       | 45  | 98                       | 81  | 100                      | 95  | 8   | 91  | Day 11           | +             |        |        | -      | ND                  |
| P723 | Allo         | 85                               | 61  | 84                      | 54  | 97                       | 34  | 97                       | 26  | 95                       | 47  | 10  | 71  | Day 14           | +             |        | +      | -      | ND                  |
| P732 | Allo         | 76                               | 66  | 93                      | 50  | 93                       | 29  | 96                       | 68  | 98                       | 84  | 11  | 75  | None             | +             |        | -      | -      | ND                  |
| P641 | Allo         | 87                               | 80  | 46                      | 32  | 95                       | 60  | 92                       | 72  | 96                       | 75  | 13  | 70  | None             | +             |        | -      | -      | ND                  |
| P647 | Allo         | 79                               | 76  | 62                      | 27  | 80                       | 56  | 99                       | 82  | 99                       | 87  | 27  | 72  | Days 7, 14       | +             |        | -      | -      | ND                  |
| P716 | Allo         | 13                               | 15  | 44                      | 33  | 98                       | 84  | 99                       | 73  | 97                       | 65  | 6   | 91  | Day 7            | +             |        |        | -      | ND                  |
| P718 | Allo         | 90                               | 77  | 87                      | 34  | 87                       | 57  | 99                       | 65  | 99                       | 92  | 14  | 75  | Day 14           | +             |        | +      | -      | ND                  |

|      |      |    |    |    |    |    |    |    |    |    |    |    |    |        |   |  |   |   |    |
|------|------|----|----|----|----|----|----|----|----|----|----|----|----|--------|---|--|---|---|----|
| P771 | Allo | 83 | 75 | 84 | 45 | 98 | 71 | 97 | 75 | 97 | 93 | 31 | 66 | Day 15 | + |  | + | - | ND |
| P783 | Allo | 33 | 38 | 86 | 51 | 98 | 68 | 99 | 78 | 99 | 94 | 4  | 92 | Day 15 | + |  | + | - | ND |

\*Day of electroporation, defined as Day 0

\*\*Day of culture

ND=Not done

**Supplemental Table 3: Genes measured using digital bar-coded probes (for nCounter Analysis**

*System)*

| CODESET DETAILS                 |                    |                 |                                                                                                           |
|---------------------------------|--------------------|-----------------|-----------------------------------------------------------------------------------------------------------|
| Gene                            | Accession          | Target Region   | Target Sequence                                                                                           |
| ABCB1                           | NM_0009<br>27.3    | 3911-<br>4010   | TATAGCACTAAAGTAGGAGACAAAGGAACTCAGCTCTCTGGTGGCCAGAAACAACG<br>CATTGCCATAGCTCGTGCCCTTGTTAGACAGCCTCATATTTTGC  |
| ABCG2                           | NM_0048<br>27.2    | 286-385         | AGGATTTAGGAACGCACCGTGCACATGCTTGGTGGTCTTGTTAAGTGGAACTGCTG<br>CTTTAGAGTTTGTGGGAAGGTCCGGGTGACTCATCCCAACAT    |
| CCR10                           | NM_0012<br>96.3    | 1346-<br>1445   | GAACAGATGGGAACCAGCTCAATTGGGTGTCCACTCAAAGTGCTCTCTCCAGGGGCC<br>TCAGTGACTGTGTTGCTAAACCCAGTGGTCAGTTCTCAGTTCT  |
| ACTB                            | NM_0011<br>01.2    | 1011-<br>1110   | TGCAGAAGGAGATCACTGCCCTGGCACCCAGCACAAATGAAGATCAAGATCATTGCTC<br>CTCCTGAGCGCAAGTACTCCGTGTGGATCGGCGGCTCCATCCT |
| ADAM19                          | NM_0230<br>38.3    | 1691-<br>1790   | GAGAAGGTGAATGTGGCAGGAGACACCTTTGGAACTGTGGAAAGGACATGAATG<br>GTGAACACAGGAAGTGCAACATGAGAGATGCGAAGTGTGGGAAGA   |
| AGER                            | NM_0011<br>36.3    | 341-440         | GAAAGGAGACCAAGTCCAACCTACCGAGTCCGTGTCTACCAGATTCTGGGAAGCCAG<br>AAATTGTAGATTCTGCCTCTGAACTCACGGCTGGTGTTCCTCAA |
| AHNAK                           | NM_0016<br>20.1    | 15421-<br>15520 | GGATTTGACCTGAATGTTCTGGGGGTGAAATTGATGCCAGCCTCAAGGCTCCGGAT<br>GTAGATGTCAACATCGCAGGGCCGGATGCTGCACTCAAAGTCG   |
| AIF1                            | NM_0329<br>55.1    | 316-415         | AAAAGCGAGAGAAAAGGAAAAGCCAACAGGCCCCCCAGCCAAGAAAGCTATCTCTG<br>AGTTGCCCTGATTTGAAGGGAAAAGGGATGATGGGATTGAAGGG  |
| AIM2                            | NM_0048<br>33.1    | 608-707         | ACGTGCTGCACAAAAGTCTCTCCTCATGTTAAGCCTGAACAGAAACAGATGGTGGC<br>CCAGCAGGAATCTATCAGAGAAGGGTTTCAGAAGCGCTGTTTG   |
| p38                             | NM_0063<br>03.3    | 508-607         | CCCTCTCCCTGCTTGTGCTGCACAGGCTGCTCTGTGAGCACTTCAGGGTCTGTCCAC<br>GGTGCACACGCACTCCTCGGTCAAGAGCGTGCCTGAAAACCT   |
| C11ORF17                        | NM_0206<br>42.3    | 571-670         | GAACATCTTAAGGACCTCTACATAGAAGTATATCCAGGGACCTATTCTGCACTGTG<br>GGCTCAAATGACTTAACCAAGAAGACTCATGTGGTAGCAGTT    |
| AKT1                            | NM_0051<br>63.2    | 1773-<br>1872   | TTCTTTGCCGGTATCGTGTGGCAGCACGTGTACGAGAAGAAGCTCAGCCCACCTTC<br>AAGCCCCAGGTCAGTTCGGAGACTGACACCAGGTATTTTGATG   |
| ALDH1A1                         | NM_0006<br>89.4    | 277-376         | TTGCTGAGCCAGTCACCTGTGTTCCAGGAGCCGAATCAGAAATGTCATCCTCAGGCA<br>CGCCAGACTTACCTGTCTACTACCGATTTGAAGATTCAATA    |
| ANXA1                           | NM_0007<br>00.1    | 516-615         | GAAATCAGAGACATTAACAGGGTCTACAGAGAGGAACTGAAGAGAGATCTGGCCAA<br>AGACATAACCTCAGACACATCTGGAGATTTTCGGAACGCTTTGC  |
| ANXA2P2                         | NR_00357<br>3.1    | 258-357         | ATATTGTCTTCTCTACCAGAGAAGGACCAAAAAGGAACTGCATCAGCACTGAAGT<br>CAGCCTTATCTGGCCACCTGGAGACGGTGATTTTGGGCCTATT    |
| Apaf1                           | NM_1818<br>69.1    | 1161-<br>1260   | TTCTGATGAACTGCAGAATCTTTGCACACGGTTGGATCAGGATGAGAGTTTTTCCA<br>GAGGCTTCCACTTAATATTGAAGAGGCTAAAGACCGTCTCCG    |
| aqp9                            | NM_0209<br>80.3    | 1503-<br>1602   | TCATCCTCGATGGGAATTCTTGCTAGGTAAGCACTAATAACTCGGCATCTTGACGATA<br>GTCCCATTTGGGTGGTTTCAGCTGCACTATCTGTATGAAATG  |
| ARG1                            | NM_0000<br>45.2    | 506-605         | AAGGAACTAAAAGGAAAGATTCCCAGTGTGCCAGGATTCTCTGGGTGACTCCCTGT<br>ATATCTGCCAAGGATATTGTGTATATTGGCTTGAGAGACGTGG   |
| Arntl                           | NM_0010<br>30272.1 | 841-940         | GATGTGACCGAGGGAAGATACTCTTTGTCTCAGAGTCTGTCTTCAAGATCCTCAACTA<br>CAGCCAGAATGATCTGATTGGTCAGAGTTTGTGTTGACTACCT |
| Beta-arrestin (ARRB2 and ARRB2) | NM_0043<br>13.3    | 1653-<br>1752   | CATTAATTTTTTACTGCTGCTTCTCCAGCCCCGCGTGGGTGGCAAGCTGTG<br>TTCATACCTAAATTTCTGGAAGGGGACAGTGAAAAGAGGAG          |
| ATF3                            | NM_0010            | 601-700         | GGCTCAGAATGGGAGGACTCCAGAAGATGAGAGAAACCTCTTTATCCAACAGATAA                                                  |

|                 |                    |               |                                                                                                            |
|-----------------|--------------------|---------------|------------------------------------------------------------------------------------------------------------|
|                 | 30287.2            |               | AAGAAGGAACATTGCAGAGCTAAGCAGTCGTGGTATGGGGGCGA                                                               |
| ATM             | NM_0000<br>51.3    | 31-130        | ACGCTAAGTCGCTGGCCATTGGTGGACATGGCGCAGGCGGTTTGTCCGACGGGC<br>CGAATGTTTTGGGGCAGTGTGTTGAGCGCGGAGACCGCGTGATA     |
| atn1            | NM_0010<br>07026.1 | 2857-<br>2956 | CCCTACCTGGGTCTGACACTCCAGCCTTGCGCACTCTCAGTGAATATGCCCGGCCTC<br>ATGTCATGTCTCCTGGCAATCGCAACCATCCATTCTACGTGC    |
| ATP2B4          | NM_0016<br>84.3    | 7641-<br>7740 | CTTCCCATAGTATCATCTGTCTCTGGAATGACTCTCTGTCCCTAAAGGGGTTAAGA<br>GAGAGATCACCTAGAAATCCCTCTGGACACTTGTGGGTTCTT     |
| Axin2           | NM_0046<br>55.3    | 1036-<br>1135 | CTTGTCCAGCAAACTCTGAGGGCCACGGCGAGTGTGAGTCCACGGAACTGTTG<br>ACAGTGGATACAGGTCCTTCAAGAGGAGCGATCCTGTTAATCCT      |
| B2M             | NM_0040<br>48.2    | 236-335       | TACTGAAGAATGGAGAGAGAATTGAAAAAGTGGAGCATTCCAGACTTGTCTTTCAGCA<br>AGGACTGGTCTTTCTATCTCTTGTACTACACTGAATTCACCCC  |
| CD57/B3GA<br>T1 | NM_0186<br>44.3    | 146-245       | CTGGACAGCGACCCCTTCTCAGACTCCAGTTGGGCCGGACTCTCAAACCTGCTCCG<br>CAATGGGTGGGTTGTGAGTGTGGTAATGAGGAGCCGTGGGT      |
| BACH2           | NM_0218<br>13.2    | 3396-<br>3495 | TGTGGCACTGTTTCATCTGCTGTCCCAGAAACCGAGAACACATTTGGTGCACACTA<br>CAGCGGTCTTAGCAGCAATACTGTTCCGAAGTATCCTCTCCTC    |
| BAD             | NM_0043<br>22.2    | 196-295       | CAGCTGTGCCTTGACTACGTAACATCTTGTCTCACAGCCCAGAGCATGTTCCAGATC<br>CCAGAGTTTGAGCCGAGTGAGCAGGAAGACTCCAGCTCTGCA    |
| RAP46           | NM_0043<br>23.3    | 1491-<br>1590 | CTCTTGATCGTGTAGTCCCATAGCTGTAAAACCAGAATCACCAGGAGGTTGCACCT<br>AGTCAGGAATATTGGGAATGGCCTAGAACAAGGTGTTTGGCA     |
| BATF            | NM_0063<br>99.3    | 294-393       | CCTGGCAAACAGGACTCATCTGATGATGTGAGAAGAGTTCAGAGGAGGGAGAAAAA<br>TCGATTGCCGCCAGAAGAGCCGACAGAGGCAGACACAGAAGG     |
| BAX             | NM_1387<br>61.2    | 695-794       | ATTTTTCTGGGAGGGGTGGGGATTGGGGACATGGGCATTTTTCTACTTTTGTAAAT<br>ATTGGGGGGTGTGGGGAAGAGTGGTCTTGAGGGGGTAATAAA     |
| BCL10           | NM_0039<br>21.2    | 1251-<br>1350 | TGAAAATACCATCTTCTCTTCAACTACACTCCCAGACCTGGGGACCCAGGGGCTCCT<br>CCTTGGCCACCAGATCTACAGTTAGAAGAAGAAGGAAGTGT     |
| Bcl11b          | NM_0228<br>98.1    | 3421-<br>3520 | GAGATGTAGCACTCATGTCTCCGAGTCAAGCGGCCTTTTCTGTGTTGATTCGGCT<br>TTCATATTACATAAGGGAAACCTTGAGTGGTGGTGTCTGGGGG     |
| Bcl2            | NM_0006<br>33.2    | 1526-<br>1625 | CCAAGCACCGCTTCGTGTGGCTCCACCTGGATGTTCTGTGCCTGTAAACATAGATTCCG<br>CTTCCATGTTGTTGGCCGGATCACCATCTGAAGAGCAGACG   |
| BCL2L1          | NM_1385<br>78.1    | 1561-<br>1660 | CTAAGAGCCATTTAGGGGCCACTTTTACTAGGGATTAGGCTGCTGGGATAAAGA<br>TGCAAGGACCAGGACTCCCTCCTCACCTCTGGACTGGCTAGAG      |
| BCLxL           | NM_0011<br>91.2    | 261-360       | ATCTTGGCTTTGGATCTTAGAAGAGAATCACTAACCAGAGACGAGACTCAGTGAGTG<br>AGCAGGTGTTTTGGACAATGGACTGGTTGAGCCCATCCCTATT   |
| BCL2L11         | NM_1386<br>21.2    | 2826-<br>2925 | TGTTGGCACCAGAACTTAAAGCGATGACTGGATGTCTCTGTACTGTATGTATCTGGTT<br>ATCAAGATGCCTCTGTGCAGAAAGTATGCCTCCCGTGGGTAT   |
| Bim             | NM_1386<br>21.4    | 258-357       | CGGACTGAGAAACGCAAGAAAAAAGACCAAATGGCAAAGCAACCTTCTGATGTAA<br>GTTCTGAGTGTGACCGAGAAGGTAGACAATTGCAGCCTGCGGAG    |
| Bcl6            | NM_0017<br>06.2    | 676-775       | GTTGTGGCACTTGCCGGAAGTTTATTAAGGCCAGTGAAGCAGAGATGGTTTCTGCC<br>ATCAAGCCTCCTCGTGAAGAGTTCCTCAACAGCCGGATGCTGA    |
| Bcl6b           | NM_1818<br>44.3    | 2136-<br>2235 | CTTTATTTGTTCTAGGGCAGCTCTGGGAACATGCGGGATTGTGGAATTGGGTCAGGA<br>ACCCTCTCTGGTATTCTGGATGTTGTAGGTTCTCTAGCAGTCT   |
| BHLHE41         | NM_0307<br>62.2    | 656-755       | CGCCCATTCAGTCCGACTTGGATGCGTTCCTCGGGATTTCAAACATGCGCCAAAG<br>AAGTCTTGCAATACCTCTCCCGGTTTGGAGAGCTGGACACCCAG    |
| BID             | NM_1979<br>66.1    | 2096-<br>2195 | GCTTAGCTTTAGAAACAGTGAACAACACTGGTCTGCTGTTCCAGTGGTAAGCTATGTCCC<br>AGGAATCAGTTTAAAAGCACGACAGTGGATGCTGGGTCCATA |
| BIRC2           | NM_0011<br>66.3    | 1761-<br>1860 | TGGGATCCACCTCTAAGAATACGTCTCCAATGAGAAACAGTTTTGCACATTCATTATC<br>TCCACCTTGGAAACATAGTAGCTTGTTCAGTGGTTCTTACTC   |
| Blk             | NM_0017<br>15.2    | 991-1090      | AGCTTCTTGCTCCAATCAACAAGGCCGGCTCCTTTCTTATCAGAGAGAGTGAAACCAA<br>CAAAGGTGCCTTCTCCCTGTCTGTGAAGGATGTCACCACCCA   |
| BMI1            | NM_0051<br>80.5    | 1146-<br>1245 | CCTGGAGAAGGAATGGTCCACTTCCATTGAAATACAGAGTTCGACCTACTTGTAAAA<br>GAATGAAGATCAGTCACCAGAGAGATGGACTGACAAATGCTGG   |
| BNIP3           | NM_0040            | 326-425       | CACCTCGCTCGCAGACACCACAAGATACCAACAGGGCTTCTGAAACAGATACCCATA                                                  |

|           |                    |               |                                                                                                            |
|-----------|--------------------|---------------|------------------------------------------------------------------------------------------------------------|
|           | 52.2               |               | GCATTGGAGAGAAAAACAGCTCACAGTCTGAGGAAGATGATAT                                                                |
| BTLA      | NM_0010<br>85357.1 | 891-990       | GCACCAACAGAATATGCATCCATATGTGTGAGGAGTTAAGTCTGTTTCTGACTCCAAC<br>AGGGACCATTGAATGATCAGCATGTTGACATCATTGTCTGGG   |
| HES1      | NM_0046<br>49.5    | 1341-<br>1440 | TTGAGTTAATCAGCGTAAGGGGATTTCTAAAGCAGGCAATCCCTGTAGCCGCAGAGA<br>ATAAACGCCTTCCCAAATGGCAACTTCCACAGCCACATTTT     |
| Car2      | NM_0000<br>67.2    | 576-675       | AGCTGTGCAGCAACCTGATGGACTGGCCGTTCTAGGTATTTTTTTGAAGGTTGGCAG<br>CGCTAAACCGGGCCTTCAGAAAGTTGTTGATGTGCTGGATTCC   |
| CA9       | NM_0012<br>16.2    | 961-1060      | CAGGTCCCAGGACTGGACATATCTGCACTCCTGCCCTCTGACTTCAGCCGCTACTTCC<br>AATATGAGGGGTCTCTGACTACACCGCCCTGTGCCAGGGTG    |
| Caspase 9 | NM_0528<br>13.2    | 1851-<br>1950 | CGCTGACTTGGCCTGGAACGAGGAATCTGGTGCCTGAAAGGCCAGCCGGACTGC<br>CGGGCATTGGGGCCGTTTGTAAAGCGGCACTATTTTGC GGAGG     |
| CASP1     | NM_0332<br>92.2    | 576-675       | ACAGGCATGACAAATGCTGCTACAAAATCTGGGGTACAGCGTAGATGTGAAAAAAA<br>TCTCACTGCTTCGGACATGACTACAGAGCTGGAGGCATTTGCAC   |
| CAT       | NM_0017<br>52.2    | 1131-<br>1230 | ATGCTTCAGGGCCGCTTTTTGCCTATCTGCACTCACCGCCATCGCTGGGACCCA<br>ATTATCTCATATACCTGTGAACTGTCCCTACCGTGCTCGAG        |
| CBLB      | NM_1706<br>62.3    | 3196-<br>3295 | TAATGTGCAAGTTGCCCGAGCATCCTCCGAGAATTTGCCTTCCCTCCTCCAGTATCC<br>CCACGTCTAAATCTATAGCAGCCAGAAGTGTAGACACCAAAA    |
| Cbx2      | NM_0326<br>47.3    | 86-185        | CAGGTCTTCGCCGCCGAGTGCATCCTGAGCAAGCGGCTCCGCAAGGGCAAGCTGGA<br>GTACCTGGTCAAGTGGCGCGGCTGGTCTCCAAACATAACAGCT    |
| Cbx5      | NM_0121<br>17.1    | 636-735       | TATGAAGAGAGACTGACATGGCATGCATATCTGAGGATGCGGAAAACAAAGAGAA<br>AGAAACAGCAAAGAGCTAAAGGAGGGGATGGTCTCTGTCAATTT    |
| CCL11     | NM_0029<br>86.2    | 379-478       | TGGGTGCAGGATTCATGAAGTATCTGGACAAAATCTCCAACCTCAAAGCCATAA<br>ATAATCACCATTTTTGAAACCAAACCAGAGCCTGAGTGTGTC       |
| CCL20     | NM_0045<br>91.1    | 36-135        | ATCTGTTCTTTGAGCTAAAACCATGTGCTGTACCAAGAGTTTGTCTCTGGCTGCTTT<br>GATGTCAGTGCTGCTACTCCACCTCTGCGGCAATCAGAAGC     |
| CCL3      | NM_0029<br>83.2    | 160-259       | CAGTTCTCTGCATCACTTGCTGCTGACACGCCGACCGCTGCTGCTTCAGCTACACCT<br>CCCGGCAGATTCCACAGAATTTTCATAGCTGACTACTTTGAGA   |
| CCL4      | NM_0029<br>84.2    | 36-135        | TTCTGCAGCCTCACCTCTGAGAAAACCTCTTTGCCACCAATACCATGAAGCTCTGCGT<br>GACTGTCTGTCTCTCTCATGCTAGTAGCTGCCTTCTGCTC     |
| CCL5      | NM_0029<br>85.2    | 281-380       | AGTGTGTGCCAACCCAGAGAAGAAATGGTTTCGGGAGTACATCAACTCTTTGGAGA<br>TGAGCTAGGATGGAGAGTCCTTGAACCTGAACTTACACAAATTT   |
| CCNB1     | NM_0319<br>66.2    | 716-815       | AACTTGAGGAAGAGCAAGCAGTCAGACCAAAAATACCTACTGGGTCCGGGAAGTCACT<br>GGAAACATGAGAGCCATCCTAATTGACTGGCTAGTACAGGTTCA |
| CCND1     | NM_0530<br>56.2    | 691-790       | TTGAACACTTCTCTCCAAAATGCCAGAGGCGGAGGAGAACAACAGATCATCCGCA<br>AACACGCGCAGACCTTCGTTGCCCTCTGTGCCACAGATGTGAA     |
| CCR1      | NM_0012<br>95.2    | 536-635       | CATCATTTGGGCCCTGGCCATCTTGCTTCCATGCCAGGCTTATACTTTTCCAAGACCC<br>AATGGGAATTCACTCACACACCTGCAGCCTTCACTTTCT      |
| CCR2      | NM_0006<br>47.3    | 2011-<br>2110 | ATGCAAGCAAGAAACTGGGCTTCTAGAACCAGGCAACTGGGAACTAGACTCCCA<br>AGCTGGACTATGGCTCTACTTTAGGCCACATGGCTAAAGAAG       |
| CCR4      | NM_0055<br>08.4    | 36-135        | GGTCCTTCTTAGCATCGTGCTTCTGAGCAAGCCTGGCATTGCCTCACAGACCTTCT<br>CAGAGCCGCTTTCAGAAAAGCAAGCTGCTTCTGGTTGGGCC      |
| CCR5      | NM_0005<br>79.1    | 2731-<br>2830 | TAGGAACATACTTCAGCTCACACATGAGATCTAGGTGAGGATTGATTACCTAGTAGT<br>CATTTTCATGGGTTGTTGGGAGGATTCTATGAGGCAACCACAGG  |
| CCR6      | NM_0314<br>09.2    | 936-1035      | CTTTAACTGCGGGATGCTGCTCCTGACTTGCATTAGCATGGACCGGTACATCGCCATT<br>GTACAGGCGACTAAGTCATTCCGGCTCCGATCCAGAACACTA   |
| CCR7      | NM_0018<br>38.2    | 1611-<br>1710 | TTCCGAAAACCAGGCCTTATCTCCAAGACCAGAGATAGTGGGGAGACTTCTTGCTT<br>GGTGAGGAAAAGCGGACATCAGCTGGTCAAACAACTCTCTGA     |
| CD160     | NM_0070<br>53.2    | 501-600       | TTGATGTTACCATAAGCCAAGTCACACCGTTGCACAGTGGGACCTACCAGTGTGT<br>GCCAGAAGCCAGAAGTCAGGTATCCGCTTCAGGGCCATTTT       |
| CD163     | NM_0042<br>44.4    | 1631-<br>1730 | CATCTGTGATTTCGACTTCTCTCTGGAAGCTGCCAGGCTTCTATGCAGGGAATTACAG<br>TGTGGCACAGTTGCTCTATCCTGGGGGAGCTCACTTTGGA     |
| CD19      | NM_0017            | 1771-         | AGATTCACACCTGACTCTGAAATCTGAAGACCTCGAGCAGATGATGCCAACCTCTGG                                                  |

|                         |                    |               |                                                                                                           |
|-------------------------|--------------------|---------------|-----------------------------------------------------------------------------------------------------------|
|                         | 70.4               | 1870          | AGCAATGTTGCTTAGGATGTGTGCATGTGTGTAAGTGTGTGTG                                                               |
| CD19R_scfv              | SCFV013.1          | 157-256       | AGCCGGCTGCACAGCGGCGTGCCAGCCGTTTAGCGGCAGCGGCTCCGGCACCGA<br>CTACAGCCTGACCATCTCCAACCTGGAGCAGGAGGACATCGCCA    |
| CD19RCD28<br>CAR        | MDA_000<br>02.1    | 3-102         | CAGGTGTTCTGAAGATGAACAGCCTGCAGACCGACGACACCCGCATCTACTACTGT<br>GCCAAGCACTACTACTACGGCGGCAGCTACGCCATGGACTACT   |
| CD2                     | NM_0017<br>67.3    | 688-787       | GCAGCCTCTTGATGGTCTTTGTGGCACTGCTCGTTTTCTATATCACAAAAGGAAAA<br>ACAGAGGAGTCGGAGAAATGATGAGGAGCTGGAGACAAGAGC    |
| CD20_scfv_r<br>utuximab | SCFV002.1          | 9-108         | GCTGTCCAGAGCCCCGCCATCCTGAGCGCCAGCCCTGGCGAGAAGGTGACCATGA<br>CCTGCCGGGCCAGCAGCTCTGTGAGCTACATGCACTGGTATCAG   |
| DNAM-1                  | NM_0065<br>66.2    | 164-263       | TAAACAGGATACGATAAAAAGTCCTTAACCAAGACGCAGATGGGAAGAAGCGTTAGA<br>GCGAGCAGCACTCACATCTCAAGAACCAGCCTTTCAAACAGTTT |
| CD244                   | NM_0163<br>82.2    | 1151-<br>1250 | AAGAGGAACCACAGCCCTTCCTTCAATAGCACTATCTATGAAGTGATTGGAAGAGT<br>CAACCTAAAGCCCAGAACCCTGCTCGATTGAGCCGCAAAGAGC   |
| CD247                   | NM_1980<br>53.1    | 1491-<br>1590 | TGGCAGGACAGGAAAAACCCGTCATGTACTAGGATACTGCTGCGTCATTACAGGGC<br>ACAGGCCATGGATGGAAAACGCTCTCTGCTCTGCTTTTTTTCT   |
| TNFRSF7<br>(CD27)       | NM_0012<br>42.4    | 331-430       | CCAGATGTGTGAGCCAGGAACATTCCTCGTGAAGGACTGTGACCAGCATAGAAAGG<br>CTGCTCAGTGTGATCCTTGCATACCGGGGGTCTCCTTCTCTCT   |
| CD274                   | NM_0141<br>43.2    | 685-784       | TAGGAGATTAGATCCTGAGGAAAACCATACAGCTGAATTGGTCATCCCAGAACTACC<br>TCTGGCACATCCTCAAATGAAAGGACTCACTTGGTAATTCTG   |
| CD276                   | NM_0010<br>24736.1 | 2121-<br>2220 | ACATTTCTTAGGGACACAGTACACTGACCACATCACACCCTCTTCTCCAGTGCTGC<br>GTGGACCATCTGGCTGCCTTTTTTCTCCAAAAGATGCAATAT    |
| CD28                    | NM_0061<br>39.1    | 306-405       | GCTGTAGCGTACGACAATGCGGTCAACCTTAGCTGCAAGTATTCTACAATCTCTTC<br>TCAAGGGAGTTCCGGGCATCCCTTCACAAAGGACTGGATAGT    |
| CMRF-35H                | NM_0072<br>61.3    | 903-1002      | GGGGCCTCCCTGCTAGCCTGGAGGATGTTTCAGAAATGGATCAAAGCTGGTGACC<br>ATTCAGAGCTGTCCCAGAACCCCAAGCAGGCTGCCACGCAGAGT   |
| CD38                    | NM_0017<br>75.2    | 1036-<br>1135 | CCTTGACTCCTTGTGGTTTATGTCATCATACATGACTCAGCATACCTGCTGGTGCAGA<br>GCTGAAGATTTTGGAGGGTCTCCACAATAAGGTCAATGCCA   |
| CD3D                    | NM_0007<br>32.4    | 111-210       | TATCTACTGGATGAGTTCGGCTGGGAGATGGAACATAGCACGTTTCTCTGCGCTG<br>GTACTGGCTACCCTTCTCTCGCAAGTGAGCCCTTCAAGATAC     |
| CD3E                    | NM_0007<br>33.2    | 76-175        | AAGTAACAGTCCCATGAAACAAAGATGCAGTCGGCACTCACTGGAGAGTTCTGGG<br>CCTCTGCCTTATCAGTTGGCGTTGGGGCAAGATGGTAATG       |
| CD4                     | NM_0006<br>16.3    | 836-935       | AGACATCGTGGTGCTAGCTTTCAGAAAGCCTCCAGCATAGTCTATAAGAAAGAGGG<br>GGAACAGGTGGAGTTCTCCTTCCCACTCGCCTTACAGTTGAA    |
| CD40LG                  | NM_0000<br>74.2    | 1226-<br>1325 | GCATTTGATTTATCAGTGAAGATGCAGAAAGGAAATGGGGAGCCTCAGCTCACATTC<br>AGTTATGGTTGACTCTGGGTTCTATGGCCTTGTTGGAGGGGG   |
| CD44                    | NM_0006<br>10.3    | 2461-<br>2560 | GTGGGCAGAAGAAAAAGCTAGTGATCAACAGTGGCAATGGAGCTGTGGAGGACAG<br>AAAGCCAAGTGGACTCAACGGAGAGGCCAGCAAGTCTCAGGAAAT  |
| CD45R_scfv              | SCFV006.1          | 159-258       | CCTGGCCAGCAACCTGAAAGCGGCGTGCTGCCAGATTTTCTGGCTCTGGCAGCGG<br>CACCGACTTCACCCTGAACATCCACCCCGTGGAGGAAGAGGAC    |
| IAP                     | NM_0017<br>77.3    | 898-997       | GCCATATTGGTTATTCAGGTGATAGCCTATATCCTCGCTGTGGTTGGACTGAGTCTCT<br>GTATTGCGGCGTGTATACCAATGCATGGCCCTCTTCTGATTT  |
| CD56R_scfv              | SCFV008.1          | 198-297       | ATTCAGCGGCTCTGGCTCCGGCACCGACTTCACTCTGATGATCTCTCGGGTGGAGGC<br>CGAGGACCTGGGCGTGTACTACTGCTTTCAGGGCAGCCACGTG  |
| CD58                    | NM_0017<br>79.2    | 479-578       | GTGCTTGAGTCTCTTCCATCTCCACACTAATTGTGCATTGACTAATGGAAGCATTG<br>AAGTCCAATGCATGATACCAGAGCATTACAACAGCCATCGAG    |
| CD63                    | NM_0017<br>80.4    | 351-450       | GTCATCATCGCAGTGGGTGCTTCTCTTCTGCTGGTGGCTTTTGTGGGCTGCTGCGGGG<br>CCTGCAAGGAGAACTATTGTCTTATGATCACGTTTGCATCT   |
| CD69                    | NM_0017<br>81.1    | 461-560       | AGGACATGAACTTTCTAAAACGATACGCAGGTAGAGAGGAACACTGGGTTGGACTG<br>AAAAAGGAACCTGGTACCATGGAAGTGGTCAAATGGCAAAGA    |
| CD7                     | NM_0061<br>37.6    | 441-540       | CCTACACCTGCCAGGCCATCACGGAGGTCAATGTCTACGGCTCCGGCACCCCTGGTCC<br>TGGTGACAGAGGAACAGTCCAAGGATGGCACAGATGCTCGGA  |
| CD70                    | NM_0012            | 191-290       | CCTATGGGTGCGTCTGCGGGCTGCTTTGGTCCCATTGGTCGCGGGCTTGGTGATCT                                                  |



|        |                    |               |                                                                                                           |
|--------|--------------------|---------------|-----------------------------------------------------------------------------------------------------------|
|        | 52.2               |               | GCCTCGTGGTGTGCATCCAGCGCTTCGCACAGGCTCAGCAGCA                                                               |
| CD80   | NM_0051<br>91.3    | 1289-<br>1388 | AAAGATCTGAAGGTCCCACCTCCATTTGCAATTGACCTCTTCTGGGAACTTCTCAGA<br>TGGACAAGATTACCCACCTTGCCCTTTACGTATCTGCTCTT    |
| CD86   | NM_0068<br>89.3    | 147-246       | TATGGGACTGAGTAACATTCTCTTTGTGATGGCCTTCTGCTCTCTGGTGCTGCTCCTC<br>TGAAGATTCAAGCTTATTTCAATGAGACTGCAGACCTGCCA   |
| CD8A   | NM_0017<br>68.5    | 1321-<br>1420 | GCTCAGGGCTCTTCTCCACACCATTGAGGTCTTCTTTCCGAGGGCCCCTGTCTCAGG<br>GTGAGGTGCTTGAGTCTCCAACGGCAAGGGAACAAGTACTT    |
| CB8B   | NM_1720<br>99.2    | 440-539       | TCAGCTGAGTGTGGTTGATTTCTTCCCACTGCCCAGCCCACCAAGAAGTCCACC<br>CTCAAGAAGAGAGTGTGCCGTTACCCAGGCCAGAGACCCAG       |
| cdc45  | NM_0035<br>04.3    | 1676-<br>1775 | AGCTCCCGGATGCTGCACAACCATTTTACCTCTCAGTAATTGAGCTGAAAGCTGAG<br>GATCGGAGCAAGTTTCTGGACGCACTTATTTCCCTCTGTCTT    |
| CDCA7  | NM_0319<br>42.4    | 771-870       | GAATTAGAAAGCTTCCCTGGCTCGTTCCGTGGAAGACATCCCCTCCCAGGCTCCGACT<br>CACAATCAAGGAGACCSCGAAGGCGTACATTCCCGGGTGTG   |
| CDH1   | NM_0043<br>60.2    | 1231-<br>1330 | CGATAATCTCCGATCTTCAATCCCACCACGTACAAGGGTCAGGTGCCTGAGAACGA<br>GGCTAACGTCGTAATCACCACTGAAAGTGACTGATGCTGAT     |
| cdk1   | NM_0017<br>86.4    | 179-278       | GGTACCTATGGAGTTGTGTATAAGGGTAGACACAAAACCTACAGGTCAAGTGGTAGC<br>CATGAAAAAATCAGACTAGAAAAGTGAAGAGGAAGGGGTTCTTA |
| CDK2   | NM_0017<br>98.2    | 221-320       | TCGCTGGCGCTTCATGGAGAACTTCCAAAAGGTGGAAGATCGGAGAGGGCACGT<br>ACGGAGTTGTGTACAAAGCCAGAAACAAGTTGACGGGAGAGGTTG   |
| CDK4   | NM_0000<br>75.2    | 1056-<br>1155 | ACTTTTAACCCACACAAGCGAATCTCTGCCTTTCGAGCTCTGCAGCACTTATCTACA<br>TAAGGATGAAGGTAATCCGGAGTGAGCAATGGAGTGGCTGC    |
| CDKN1A | NM_0003<br>89.2    | 1976-<br>2075 | CATGTGCTCTGGTTCCCGTTTCTCCACCTAGACTGTAAACCTCTCGAGGGCAGGGACC<br>ACACCCTGACTGTTCTGTGTCTTTCACAGCTCCTCCACAA    |
| CDKN1B | NM_0040<br>64.2    | 366-465       | GCTTCCGAGAGGGGTTCCGGCCGCGTAGGGGCGCTTTGTTTTGTTCCGTTTTGTTTT<br>TTGAGAGTGCAGAGAGGGCGTCTGCAGACCCGGGAGAAAAG    |
| p16    | NM_0000<br>77.3    | 976-1075      | AAGCGCACATTCATGTGGGCATTTCTTTCGAGCCTCGCAGCCTCCGGAAGCTGTCTGA<br>CTTCATGACAAGCATTTTGTGAACTAGGGAAGCTCAGGGGGGT |
| CDKN2C | NM_0012<br>62.2    | 1296-<br>1395 | ATAATGTAAACGTCAATGCACAAAATGGATTTGGAAGGACTGCGCTGCAGGTTATGA<br>AACTTGGAATCCCGAGATTGCCAGGAGACTGCTACTTAGAGG   |
| CD66b  | NM_0018<br>16.3    | 826-925       | ATTTCCCCTTCAGACACCTATTACCATGCAGGGGTAATCTCAACCTCTCTGCCATGC<br>GGCCTCTAATCCACCCTCACAGTATTCTTGGTCTGTCAATG    |
| CEBPA  | NM_0043<br>64.2    | 1321-<br>1420 | GAGCTGGGAGCCCGCAACTCTAGTATTTAGGATAACCTTGTGCCTTGGAAATGCAA<br>ACTCACCGCTCCAATGCCTACTGAGTAGGGGGAGCAAATCGTG   |
| Cebpb  | NM_0051<br>94.2    | 1421-<br>1520 | CAACCGCACATGCAGATGGGGCTCCCGCCCGTGGTGTTATTTAAGAAGAAACGTCT<br>ATGTGTACAGATGAATGATAAACTCTGCTTCTCCCTCTGCC     |
| CFLAR  | NM_0038<br>79.3    | 446-545       | CAAGACCCTGTGAGCTTCCCTAGTCTAAGAGTAGGATGTCTGCTGAAGTCATCCATC<br>AGGTTGAAGAAGCACTTGATACAGATGAGAAGGAGATGCTGC   |
| C-flip | NM_0011<br>27183.1 | 654-753       | TAGAGTGCTGATGGCAGAGATTGGTGAGGATTTGGATAAATCTGATGTGTCCTCATT<br>AATTTTCTCATGAAGGATTACATGGGCCGAGGCAAGATAAGC   |
| Chd7   | NM_0177<br>80.3    | 3076-<br>3175 | AAGCAGGGCCAGAACAAGTTCCTTTCAGAGATTGAGGATGAGCTTTTTAATCCAGAT<br>TATGTGGAGTTGACCGGATAATGGACTTTGCACGTAGCACAG   |
| Cpt1   | NM_0202<br>44.2    | 1304-<br>1403 | GATATGGTGATATACTTTAGTGCTTTGTGCTGCAAATTTCAAGACACCTTCATCTAA<br>ATATATCAAGACTGCATGTCATCAAGCACCTGAACAGGTTT    |
| Churc1 | NM_1451<br>65.2    | 21-120        | GAGTTTTCTGCTTCCCGGAAGCGTTGGAGGACATTCCCTGTTGACTGCGTCGCGATG<br>TGTGGCGACTGTGTGGAGAAGGAATATCCCAACCGGGTAATA   |
| CIITA  | NM_0002<br>46.3    | 471-570       | GCCTGAGCAAGGACATTTTCAAGCACATAGGACCAGATGAAGTATCGGTGAGAGT<br>ATGGAGATGCCAGCAGAAGTTGGGCAGAAAAGTCAGAAAAGACC   |
| CITED2 | NM_0060<br>79.3    | 966-1065      | AGGAGCTGCCGAACCTGGCTGGGGCAAACGAGTTTATTTTATGACGGACTTCG<br>TGTGCAAACAGCAGCCAGCAGAGTGAGCTGTTGACTCGATCG       |
| CLIC1  | NM_0012<br>88.4    | 311-410       | GTGATGGGGCCAAGATTGGGAACTGCCATTCTCCAGAGACTGTTTATGGTACTGT<br>GGCTCAAGGGAGTCACCTTCAATGTTACCACCGTTGACACCAA    |
| Clnk   | NM_0529            | 1109-         | GAAGGAGAACAAGGATGGTAGTTTCTTGGTCCGAGATTGTTCCACAAAATCCAAGGA                                                 |

|            |                    |               |                                                                                                          |
|------------|--------------------|---------------|----------------------------------------------------------------------------------------------------------|
|            | 64.2               | 1208          | AGAGCCCTATGTTTTGGCTGTGTTTTATGAGAACAAAGTCTAC                                                              |
| c-MET_scfv | SCFV004.1          | 139-238       | CTGATCTACGCCGCCAGCAGCCTGAAGAGCGGCGTGCCAGCCGTTTAGCGGCTCT<br>GGCTCTGGCGCCGACTTCACCCTGACCATCAGCAGCCTGCAGC   |
| Cnbp       | NM_0034<br>18.4    | 646-745       | CCATCAACTGCAGCAAGACAAGTGAAGTCAACTGTTACCGCTGTGGCGAGTCAGGGC<br>ACCTTGCACGGGAATGCACAATTGAGGCTACAGCCTAATTATT |
| cnr2       | NM_0018<br>41.1    | 1571-<br>1670 | AATGGGTTGTTCTCTTGGGAAGTCAGGGTATCAGATGGGATGGACATCCAGGTCTC<br>TCTCTGCCTAATTGTCAAGGCCTCCTTGGCTCTGGAGCTATGA  |
| cnrip1     | NM_0011<br>11101.1 | 817-916       | ACGCTGCAGGTCGAGAATATTTCCATTGGTGGTGTGCTTGTCCCCTGGAAGTGAAG<br>TCTAAAGAGCCTGATGGGGACAGAGTTGTTTATACGGGTACAT  |
| CREB1      | NM_0043<br>79.3    | 4856-<br>4955 | TTTGATGGTAGGTGAGCAGCAGTGTAGTCTCTGAAAGCACAATACCAGTCAGGCAG<br>CCTATCCCATCAGATGTCATCTGGCTGAAGTTTATCTCTGTCT  |
| Crem       | NM_0018<br>81.2    | 261-360       | CTCCACCTCCTCGCGTCCGTAATCAGTGACGAGGTCCGCTACGTAAATCCCTTTGCGG<br>CGGACAAATGACCATGGAAACAGTTGAATCCCAGCATGATGG |
| CRIP1      | NM_0013<br>11.4    | 270-369       | CAACCACCCCTGCTACGCAGCCATGTTTGGGCTAAAGGCTTTGGGCGGGGCGGAG<br>CCGAGAGCCACACTTTCAAGTAAACCAGGTGGTGGAGACCCCAT  |
| TSLP-R     | NM_0221<br>48.2    | 1421-<br>1520 | CAAGGCAGCACGTCCAAAATGCTGTAACCATCTTCCCCTCTGTGAGTCCCAGTT<br>CCGTCCATGTACCTGTTCCATAGCATTGGATTCTCGGAGGAT     |
| CSAD       | NM_0159<br>89.4    | 206-305       | TCAAATCTTCTGCCTAGCCTTAGCCATTAGAGAGAGGTCTGCTAAAGATGGACTGC<br>AAATGCGCTTGATGGAAGGAGATGTCAATCCACTGAAGTCC    |
| CSF2       | NM_0007<br>58.2    | 476-575       | AGATGAGGCTGGCCAAGCCGGGAGCTGCTCTCTCATGAAACAAGAGCTAGAACT<br>CAGGATGGTCATCTTGGAGGGACCAAGGGGTGGGCCACAGCCAT   |
| CSNK2A1    | NM_1775<br>59.2    | 1931-<br>2030 | CCATCCCACCATTGTTCTCCACCGTCCCACACTTTAGGGGGTTGGTATCTCGTGCTC<br>TTCTCCAGAGATTACAAAATGTAGCTTCTCAGGGGAGGCA    |
| CTGF       | NM_0019<br>01.2    | 1101-<br>1200 | ACCACCCTGCCGGTGGAGTTCAAGTGCCCTGACGGCGAGGTCATGAAGAAGAACAT<br>GATGTTTCATCAAGACCTGTGCCTGCCATTACAACGTCCCGGAG |
| CTLA4      | NM_0052<br>14.3    | 406-505       | AGTCTGTGCGGCAACCTACATGATGGGAATGAGTTGACCTTCTAGATGATTCCAT<br>CTGCACGGGCACCTCCAGTGGAATCAAGTGAACCTCACTATC    |
| CTNNA1     | NM_0019<br>03.2    | 76-175        | TCGCCCAGCTAGCCGAGAAATGACTGCTGTCCATGCAGGCAACATAAACTTCAAGT<br>GGGATCCTAAAAGTCTAGAGATCAGGACTCTGGCAGTTGAGAG  |
| CTNNB1     | NM_0010<br>98210.1 | 1816-<br>1915 | TCTTGCCCTTTGCCGCAAATCATGCACCTTTGCGTGAGCAGGGTGCCATTCCACGA<br>CTAGTTCAGTTGCTTGTTCGTGCACATCAGGATACCCAGCGC   |
| CTNNB1     | NM_0308<br>77.3    | 856-955       | TGATGCCAACAACTGTATTGCAGTGAAGTGTGGCCATATTGCTCCAGGACAATGA<br>TGAAAACAGGGAATTGCTTGGGGAGCTGGATGGAATCGATGTG   |
| cathepsinC | NM_0011<br>14173.1 | 261-360       | TGCTCGGTTATGGGACCACAAGAAAAAAAGTAGTGGTGTACCTTCAGAAGCTGGAT<br>ACAGCATATGATGACCTTGGCAATTCTGGCCATTTACCATCA   |
| CathepsinD | NM_0019<br>09.4    | 1271-<br>1370 | GGGCCACTCTGGATCCTGGGCGACGTCTTCATCGGCCGCTACTACACTGTGTTTGACC<br>GTGACAACAACAGGGTGGGCTTCGCCGAGGCTGCCCGCTCT  |
| CTSW       | NM_0013<br>35.3    | 1076-<br>1175 | TGCACCGAGGGAGCAATACCTGTGGCATCACCAAGTTCCCGCTCACTGCCCGTGTGC<br>AGAAACCGGATATGAAGCCCCGAGTCTCCTGCCCTCCCTGAAC |
| CX3C1      | NM_0029<br>96.3    | 141-240       | AGCACCACGGTGTGACGAAATGCAACATCACGTGCAGCAAGATGACATCAAAGATA<br>CCTGTAGCTTTGCTCATCCACTATCAACAGAACCAGGCATCATG |
| CX3CR1     | NM_0013<br>37.3    | 1041-<br>1140 | GGGCGCTCAGTCCACGTTGATTTCTCTCATCTGAATCACAAGGAGCAGGCATGGA<br>AGTGTCTGAGCAGCAATTTACTTACCACACGAGTGATGGAG     |
| CXCL10     | NM_0015<br>65.1    | 41-140        | GCAGAGGAACCTCCAGTCTCAGCACCATGAATCAAAGTGCAGTCTGATTTGCTGCCT<br>TATCTTTCTGACTCTAAGTGGCATTCAAGGAGTACCTCTCTC  |
| CXCL12     | NM_1991<br>68.2    | 506-605       | GGGCTGAGGTTTGCCAGCATTTAGACCCTGCATTTATAGCATACGGTATGATATTGC<br>AGCTTATATTCATCCATGCCCTGTACCTGTGCACGTTGGAAC  |
| CXCL9      | NM_0024<br>16.1    | 1976-<br>2075 | CACCATCTCCATGAAGAAAGGGAACGGTGAAGTACTAAGCGCTAGAGGAAGCAGC<br>CAAGTCGGTTAGTGAAGCATGATTGGTCCCAGTTAGCCTCTG    |
| CXCCR1     | NM_0006<br>34.2    | 1951-<br>2050 | GCAGCCACCAGTCCATTGGGCAGGCAGATGTTCTAATAAAGCTTCTGTTCCGTGCTT<br>GTCCCTGTGGAAGTATCTTGGTTGTGACAGAGTCAAGGGTGT  |
| CXCR3      | NM_0015            | 81-180        | GTGAGTGACCACCAAGTGCTAAATGACGCCGAGGTTGCCGCCCTCCTGGAGAAGTTC                                                |

|                        |                    |               |                                                                                                            |
|------------------------|--------------------|---------------|------------------------------------------------------------------------------------------------------------|
|                        | 04.1               |               | AGCTCTTCCTATGACTATGGAGAAAACGAGAGTGACTCGTGCT                                                                |
| CXCR4                  | NM_0010<br>08540.1 | 136-235       | GTCCTATGGGAAAAGATGGGGAGGAGAGTTGTAGGATTCTACATTAATTCTCTTGT<br>GCCCTTAGCCACTACTTCAGAATTTCTGAAGAAAGCAAGCC      |
| CXCR6                  | NM_0065<br>64.1    | 96-195        | TTACCATGAAGACTATGGGTTTCAGCAGTTTCAATGACAGCAGCCAGGAGGAGCATCA<br>AGACTTCTGCAGTTCAGCAAGGTCCTTCTGCCCTGCATGTAC   |
| Dapl 1                 | NM_0010<br>17920.2 | 191-290       | CGAGAAAACAAGTGCCATTGCAAATGTTGCCAAAATACAGACTGGATGCCCTGAA<br>TGACGCACTGGAGAAGCTCAACTATAAATTTCCAGCAACAGTG     |
| 1-Dec                  | NM_0174<br>18.2    | 191-290       | AGGCCTTACTTTCCAGATCCAGATCCTTGTGCATACAACACTGACTTGTGTGGGTGAGGC<br>TTGCAGAAAAAATCAGCTAGAACAGCCTTGGGGGTAGTGGCA |
| DECTIN-1R              | SCFV010.1          | 271-370       | CTGAAGATCGACAGCAGCAACGAGCTGGGCTTCATCGTGAAGCAGGTGTCCAGCCA<br>GCCCCACAACCTCTTCTGGATCGGCCTGAGCAGGCCCCAGACCG   |
| DGKA                   | NM_0013<br>45.4    | 1376-<br>1475 | TTCCTAACACCCACCCACTTCTCGTCTTTGTCAATCCTAAGAGTGCGGGGAAGCAGGG<br>GCAAAGGGTGCTCTGGAAGTTCCAGTATATATTAACCCCTCG   |
| dmrta1                 | NM_0221<br>60.2    | 1516-<br>1615 | AGAGTAGGTATCAGTCCATTAAGGCTGGCATATTCTTCTGCAGGAAGAGGGTTATCT<br>GGTTTTATGTCACCCTACCTAACACCTGGGTTAGTACCAACCT   |
| Dnmt1                  | NM_0013<br>79.2    | 1496-<br>1595 | CAAAACCAATCTATGATGATGACCCATCTCTTGAAGGTGGTGTAAATGGCAAAAATCT<br>TGGCCCCATAAATGAATGGTGGATCACTGGCCTTGTATGGAGG  |
| Dock5                  | NM_0249<br>40.6    | 631-730       | TGCGAGATGACAATGGGAACATCCTAGACCCTGACGAAACCAGCACCATTGCCCTCT<br>TCAAGGCCCATGAGGTGGCCTCCAAAAGGATTGAGGAAAAGAT   |
| dock9                  | NM_0011<br>30048.1 | 1021-<br>1120 | CTTTGAAGCTGCAATGCAAGAAAAGCGAAATGGCGACTCTCACGAAGATGATGAAC<br>AAAGCAAATTGGAAGGTTCTGGTCCGGTTTAGATAGCTACCTG    |
| Dok2                   | NM_0039<br>74.2    | 651-750       | GCCAGGGACCCAGCTGTACGACTGGCCCTACAGGTTTCTGCGGCCTTTGGGCGGG<br>ACAAGGTAACCTTTTTCTTTGAGGCAGGCCGTGCTGCGTCTCT     |
| DPP4                   | NM_0019<br>35.3    | 2701-<br>2800 | CAGCAGTCAGCTCAGATCTCAAAGCCCTGGTCGATGTTGGAGTGGATTTCCAGGCA<br>ATGTGGTATACTGATGAAGACCATGGAATAGCTAGCAGCACAG    |
| DUSP16                 | NM_0306<br>40.2    | 616-715       | ATGGGTTTAACTCTCCTTTTGCCAGTACCACCAGCCTGACCTCATACACTTTTAGTAC<br>AATGGAGTGGCTGAGCCTTTGAGCACACCACCATTACATCA    |
| E2f1                   | NM_0052<br>25.1    | 936-1035      | CCAGCTCCAAGCCGTGGACTCTTCGGAGAACTTTCAGATCTCCCTAAGAGCAAACAA<br>GGCCCCGATCGATGTTTTCTGTGCCCTGAGGAGACCGTAGGT    |
| E2f4                   | NM_0019<br>50.3    | 221-320       | GCCAGAAGCGGCGGATTTACGACATTACCAATGTTTTGGAAGGTATCGGGCTAATCG<br>AGAAAAAGTCCAAGAACAGCATCCAGTGAAGGGTGTGGGGCC    |
| E2f6                   | NM_1983<br>25.1    | 2181-<br>2280 | TGTATGCAGCCTTGCTGTTGAGTCAGTCCAAGGGGTTTTACTTAGGACAAGTTGTACC<br>TTGCCCTCTCTCAGCTGCTCCACATTTTACATACCTA        |
| Edaradd                | NM_0807<br>38.3    | 396-495       | AAAATCAGGGAGAAGAAAATGGCTTTCCAGATAGCACTGGAGATCCTCTTCCAGAGA<br>TCAGCAAGGACAACCTCTGCAAAGAAAAGTACTTGTTCCTC     |
| EGFR_scfv_<br>NIMO_CAR | SCFV015.1          | 162-261       | CAAGGTGTCCAACAGATTTCAGCGCGTGCCAGCAGATTTTCAGGAAGCGGCAGCG<br>GCACCGACTTCACCTTACCATCAGCTCACTGCAGCCGAAGAT      |
| EGLN1                  | NM_0220<br>51.1    | 3976-<br>4075 | AGCAGCATGGACGACCTGATACGCCACTGTAACGGGAAGCTGGGCAGCTACAAAAT<br>CAATGGCCGGACGAAAGCCATGGT                       |
| EGLN3                  | NM_0220<br>73.3    | 801-900       | AAGCTACATGGTGGGATCCTGCGGATATTTCCAGAGGGGAAATCATTATAGCAGAT<br>GTGGAGCCATTTTTGACAGACTCCTGTTCTTCTGGTCAGATC     |
| egr2                   | NM_0003<br>99.3    | 1892-<br>1991 | GGTGGAGCTAGCACTGCCCCCTTCCACCTAGAAGCAGGTTCTTCTAAAACCTTAGCC<br>CATTCTAGTCTCTTAGGTGAGTTGACTATCAACCCAAGGC      |
| EIF1                   | NM_0058<br>01.3    | 870-969       | CCTGAACAGTCTCGGTGAATCTGAGAGGAGAGGATGGGGTAAGGCAGAAGCACCA<br>GCTGTACTACTAGAAGGGAGCTTTTGGTGGTAGATCCCCTGGTG    |
| ELF4                   | NM_0014<br>21.3    | 336-435       | AGCTCTGGAGGGCTCTGATAATCCCGTTGTCAGCTCTGAAAAGACAGCATGGCTA<br>TTACCCTACAGCCCAGTGACCTGATCTTTGAGTTGCGAAGCAA     |
| ELF1                   | NM_0323<br>77.3    | 126-225       | AGACCCAGTTCACCTGCCCCCTTGTCAACCACGAGAAATCCTGTGATGTGAAAATGG<br>ACCGTGCCCGCAACACCGGAGTCATCTTGTACCGTGTGCCT     |
| CD39                   | NM_0010<br>98175.1 | 8831-<br>8930 | AGTGTATTAGATGTATTACCTCCATGCTCTCAGTAGAGGCCATAGGAAAGAGTAGG<br>TAGGTTATGCCAGCTCACACGCATCCTTTAAAATGGTTTAGA     |
| ENTPD1                 | NM_0017            | 226-325       | TTCGAGTAACTTTAGGAAAATGAGCTGCTGGACTCCTCAGTCAATCTGTCCTTTCTAG                                                 |

|         |                    |               |                                                                                                           |
|---------|--------------------|---------------|-----------------------------------------------------------------------------------------------------------|
|         | 76.4               |               | TCAATGAAAAAGACAGGGTTTGAGGTTCTTCCGAAACGGGG                                                                 |
| Eomes   | NM_0054<br>42.2    | 1671-<br>1770 | ATCCCATGCCCTGGGGTATTACCCAGACCCAACCTTTCTGCAATGGCAGGGTGGGG<br>AGGTCGAGGTTCTTACCAGAGGAAGATGGCAGCTGGACTACCA   |
| EphA2   | NM_0044<br>31.2    | 1526-<br>1625 | GAGCCGAGTGTGGAAGTACGAGGTCACTTACCGCAAGAAGGGGAGACTCCAACAGCT<br>ACAATGTGCGCCGACCGAGGGTTTCTCCGTGACCCTGGACGAC  |
| EPHA4   | NM_0044<br>38.3    | 21-120        | GCAGCGTTGGCACC GGCGAACCATGGCTGGGATTTCTATTTCCGCCTATTTTCGTGT<br>CTCTTCGGGATTTGCGACGCTGTACAGGTTCCAGGGTATAC   |
| ERK     | NM_0174<br>49.2    | 786-885       | CAAAGCAGGCTTCGAGGCCGTTGAGAATGGCACCGTCTGCCGAGGTTGTCCATCTGG<br>GACTTTCAAGGCCAACCAAGGGGATGAGGCCTGTACCCACTGT  |
| ets1    | NM_0052<br>38.3    | 4626-<br>4725 | GGTTTTACAGCATTAACTGCCTAACCTTCATGGTGAGAAATACACCATCTCTTTCTA<br>GTCATGCTGTGCATGCCGCTTACTCTGTTGGGGTCTATATA    |
| Etv3    | NM_0011<br>45312.1 | 272-371       | AAGAGCAGCGGGTGA AAATGAAAGCCGGCTGTAGCATCGTGAAAAGCCAGAAG<br>GAGGTGGAGGGTATCAGTTTCTGACTGGGCCTACAAAACAGAGT    |
| ETV6    | NM_0019<br>87.4    | 3841-<br>3940 | GTATGAATATGAAATCAGAGACCAGGGCATGATGTTGCTAGGATTAGAGCCTCTCAG<br>TCTGGCCTCTTACCCAAGTGCAAGAACTCAGTCTCTTACTGT   |
| FADD    | NM_0038<br>24.2    | 1561-<br>1660 | TGAGACTGCTAAGTAGGGCAGTGATGGTTGCCAGGACGAATTGAGATAATATCTG<br>TGAGGTGCTGATGAGTGATTGACACACAGCACTCTCTAAATCTT   |
| C10RF24 | NM_0529<br>66.2    | 3527-<br>3626 | TGCCAATAGATTCAAGAGAAGCTAAGCGGAAATGGAGGGTGAAGGTGTGATCTG<br>TGGGACTGTCTGGGCCTGTTACTCATCCTGCTATCAATTTCTTA    |
| FANCC   | NM_0001<br>36.2    | 2131-<br>2230 | GACTCAGTCAGACATGTTCACTAATGACTCAAGTGAGCCTTCGGTACTCCTGGTGCCC<br>GCCCGGCCAGACCGTCAGCTTGATAATTACTAAAGCAAAGGC  |
| FAS     | NM_0000<br>43.3    | 91-190        | CACCGGGCTTTTCGTGAGCTCGTCTCTGATCTCGCGCAAGAGTGACACACAGGTGT<br>TCAAAGACGCTTCTGGGAGTGAGGGAAGCGGTTTACGAGTGA    |
| FASLG   | NM_0006<br>39.1    | 626-725       | TCCATGCCTCTGGAATGGGAAGACACCTATGGAATTGCTCTGCTTTCTGGAGTGAAG<br>TATAAGAAGGGTGGCCTTGATCAATGAAACTGGGCTGTACT    |
| CD16    | NM_0005<br>70.3    | 74-173        | CCTATTCCTGTTCTATGGTGGGGCTCCATTGCGAGACTTCAGATTGAGAAATCAGATG<br>AAGTTTCAAGAAAAGGAAACTGGCAGGTGACAGAGATGGGGT  |
| Fgl2    | NM_0066<br>82.2    | 251-350       | CAATTCAGCAGGATCGAGGAGGTGTTCAAAGAAGTCCAAAACCTCAAGGAAATCGT<br>AAATAGTCTAAAGAAATCTTGCCAAGACTGCAAGCTGCAGGCTG  |
| FLT1    | NM_0020<br>19.2    | 5616-<br>5715 | TTCAACTGCTTTGAACTTGCCTGGGGTCTGAGCATGATGGGAATAGGGAGACAGG<br>GTAGGAAAGGGCGCCTACTCTTCAGGGTCTAAAGATCAAGTGGG   |
| FLT3LG  | NM_0014<br>59.3    | 361-460       | AGCGGCTCAAGACTGTCGCTGGGTCCAAGATGCAAGGCTTGCTGGAGCGCGTGAAC<br>ACGGAGATACACTTTGTCAACAAATGTGCCTTTTCAGCCCCCCCC |
| FOS     | NM_0052<br>52.2    | 1476-<br>1575 | ACTCAAGTCCTTACCTCTCCGGAGATGTAGCAAAACGCATGGAGTGTGTATTGTTCC<br>CAGTGACACTTCAGAGAGCTGGTAGTTAGTAGCATGTTGAGC   |
| Foxd4   | NM_2073<br>05.4    | 354-453       | ACTCCGATGGGGAAGACGGTAAATCGATGTCCTGGGAGAGGAGGAAGATGAAGA<br>CGAGGAGGAGGCGGCGAGCCAGCAGTTCCTAGAGCAGTCGCTCCA   |
| Foxm1   | NM_0219<br>53.2    | 3209-<br>3308 | AAGTCTTTTGTATTGGGTCAGGAGTTGAATTTGGGGTGGGAGGATGGATGCAACTG<br>AAGCAGAGTGTGGGTGCCAGATGTGCGCTATTAGATGTTTCTC   |
| Foxo1   | NM_0020<br>15.3    | 1527-<br>1626 | TCTCATACCAACATCATTAACTGTTTCGACCCAGTCTCACCTGGCACCATGATGCA<br>GCAGACGCCGTGCTACTCGTTTGCGCCACCAAACACCAGTTT    |
| Foxo3   | NM_0014<br>55.2    | 1861-<br>1960 | CCGGAACGTGATGCTTCGCAATGATCCGATGATGTCCTTTGCTGCCAGCCTAACCA<br>GGAAGTTTGGTCAATCAGA ACTTGCTCCACCACCAGCACCAA   |
| FoxP1   | NM_0326<br>82.5    | 6759-<br>6858 | CCTGAAAATCAGATTTACAATGCTGAAGCATTTCCTTGGGCCAGTGTAGCTCACGC<br>AATCTCTGCTACCATAAGCCTTGATGAAGATGATACAGTCCG    |
| FOXP3   | NM_0140<br>09.3    | 1231-<br>1330 | GGGCCATCCTGGAGGCTCCAGAGAAGCAGCGGCACTCAATGAGATCTACCACTGG<br>TTCACACGCATGTTTGCCTTCTCAGAAACCATCCTGCCACCTG    |
| FYN     | NM_0020<br>37.3    | 766-865       | GTCTTTGGAGGTGTGAACTCTTCGTCTCATAACGGGGACCTTGCCTACGAGAGGAGGA<br>ACAGGAGTGACACTCTTGTGGCCCTTATGACTATGAAGCAC   |
| FZD1    | NM_0035<br>05.1    | 2431-<br>2530 | GTGCCAATCCTGACATCTCGAGGTTTCTCACTAGACA ACTCTCTTTCCGAGGCTCCTT<br>TGAACAACTCAGCTCCTGCAAAAGCTTCCGTCCTGAGGCA   |
| G6PD    | NM_0004            | 1156-         | ACAACATCGCTGCGTTATCTCACCTTCAAGGAGCCCTTTGGCACTGAGGGTCCGG                                                   |

|                  |                    |               |                                                                                                            |
|------------------|--------------------|---------------|------------------------------------------------------------------------------------------------------------|
|                  | 02.2               | 1255          | GGGGCTATTTTCGATGAATTTGGGATCATCCGGGACGTGATGCA                                                               |
| GABPa            | NM_0020<br>40.3    | 1161-<br>1260 | GACCAAGTCCTGCATTGGGTGGTTTGGGTAATGAAGGAATTCAGCATGACCGATATA<br>GACCTCACCACACTCAACATTTCCGGGAGAGAATTATGTAGTC   |
| GADD45alp<br>ha  | NM_0019<br>24.2    | 866-965       | GTTACTCCCTACACTGATGCAAGGATTACAGAACTGATGCCAAGGGGCTGAGTGAG<br>TTCAACTACATGTTCTGGGGGCCCGGAGATAGATGACTTTGCA    |
| GADD45bet<br>a   | NM_0156<br>75.2    | 366-465       | TGTGGACCCAGACAGCGTGGTCCTCTGCCTCTTGCCATTGACGAGGAGGAGGAGG<br>ATGACATCGCCTGCAAATCCACTTCACGCTCATCCAGTCCTTC     |
| GAL3ST4          | NM_0246<br>37.4    | 1141-<br>1240 | CGAGCCCAAACCTCAATCCCAATGCCCTCATCCATCCTGTTTCCACTGTTACTGATCA<br>TCGCAGCCAGATATCAAGCCCTGCCTCTTTCGATTTGGGGT    |
| GAS2             | NM_0052<br>56.3    | 916-1015      | GATCTCCCGTGTGGATGGCAAACATCCCCTATCCAAAGCAAATCTCCAACCTAAAG<br>GACATGAATCCAGATAACTACTTGGTGGTCTCTGCCAGTTAT     |
| GATA2            | NM_0326<br>38.3    | 1496-<br>1595 | GAAGAAGGAAGGGATCCAGACTCGGAACCGGAAGATGTCCAACAAGTCCAAGAAG<br>AGCAAGAAAGGGGCGGAGTGCTTCGAGGAGCTGTCAAAGTGCATG   |
| GATA3            | NM_0010<br>02295.1 | 2836-<br>2935 | AAGAGTCCGGCGGCATCTGTCTTGTCCCTATTCTGCAGCCTGTGCTGAGGGTAGCA<br>GTGTATGAGCTACCAGCGTGCATGTCAGCGACCCTGGCCCCGAC   |
| gBAD-<br>1R_scfv | SCFV001.1          | 270-369       | CCTGACCATCAGCAGCGTGAAGGCCGAGGATCTGGCCGTGTACTACTGCCAGCAGTA<br>CTACAGATACCCCTACACCTTCGGCGGAGGCACCAAGCTGGAA   |
| SIP1             | NM_0010<br>09182.1 | 538-637       | ACAAGCAACAGTAACTAGTGTCTTGGAAATATCTGAGTAATTGTTTGGAGAAAGAGA<br>CTTTACTCCAGAATTGGGAAGATGGCTTTATGCTTTATTGGCT   |
| Gfi1             | NM_0052<br>63.2    | 2236-<br>2335 | TCATCACTGGAGGTAAAAGCACAAAGCAATGCCTGTGGACAAGATGTCATTCATTAC<br>TCAGCAAATGTTTCATGGATCACCGGCTACCAAGGTACCAGGCA  |
| GIMAP4           | NM_0183<br>26.2    | 316-415       | AACAGAACTTGTCTAGTTGACACACCAGGCATTTTCGACACAGAGGTGCCCAATGC<br>TGAAACGTCCAAGGAGATTATTCGCTGCATTCTTCTGACCTCC    |
| GIMAP6           | NR_02411<br>5.1    | 2176-<br>2275 | CTGCCTGGTTTATGGGAGAACTCTGAAGCCCATGATGTTTTCTGGAAGGCTGTTCT<br>ACAGACGGGGTTTATAAGTACTGATACTGGACAGGATGAGAA     |
| GLIPR1           | NM_0068<br>51.2    | 256-355       | CTGCGTTCGAATCCATAACAAGTTCCGATCAGAGGTGAAACCAACAGCCAGTGATAT<br>GCTATACATGACTTGGGACCCAGCACTAGCCCAAATTGCAAAA   |
| GLO1             | NM_0067<br>08.1    | 1241-<br>1340 | GGAAATGATATGGTACCCAGACACTGGGCTAGGCTGCAACTTTATCTCATTTAATACT<br>CCCAGCTGTCTGTGAGAAAGAAAGCAGGCTAGGCATGTGAA    |
| GNLY             | NM_0064<br>33.2    | 306-405       | CAGGAGCTGGCCGTGACTACAGGACCTGTCTGACGATAGTCCAAAACTGAAGAA<br>GATGGTGGATAAGCCCACCCAGAGAAGTGTTCCAATGCTGCGA      |
| GSK3B            | NM_0020<br>93.2    | 926-1025      | ACTGATTACCTCTAGTATAGATGTATGGTCTGCTGGCTGTGTGTTGGCTGAGCTGT<br>TACTAGGACAACCAATATTTCCAGGGGATAGTGGTGTGGATC     |
| GZMA             | NM_0061<br>44.2    | 156-255       | AGACCCTACATGGTCTACTTACTTGTCTTACAGAAAAACCATCTGTGCTGGGGCTTTGA<br>TTGCAAAAGACTGGGTGTTGACTGCAGCTCACTGTAACCTTGA |
| GZMB             | NM_0041<br>31.3    | 541-640       | ACACTACAAGAGGTGAAGATGACAGTGCAGGAAGATCGAAAGTGCGAATCTGACTT<br>ACGCCATTATTACGACAGTACCATTGAGTTGTGCGTGGGGGACC   |
| GzmH             | NM_0334<br>23.3    | 706-805       | AAAAAAGGGACACCTCCAGGAGTCTACATCAAGGTCTCACACTTCTGCCCTGGATA<br>AAGAGAACAATGAAGCGCCTCTAACAGCAGGCATGAGACTAAC    |
| GZMK             | NM_0021<br>04.2    | 701-800       | CTGTAAAGGTGCTTCCACGCTATAGTCTCTGGAGGTCATGAATGTGGTGTGCCACA<br>AAGCCTGGAATCTACACCCTGTAAACCAAGAAATACCAGACT     |
| Hat1             | NM_0036<br>42.2    | 686-785       | TGGAGCTACGCTCTTTGCGACCGTAGGCTACATGACAGTCTATAATTACTATGTGTAC<br>CCAGACAAAACCCGGCCACGTGTAAGTCAGATGCTGATTTTG   |
| TIM-3            | NM_0327<br>82.3    | 956-1055      | TATATGAAGTGGAGGAGCCCAATGAGTATTATTGCTATGTCAGCAGCAGGCAGCAAC<br>CCTCACAACCTTTGGGTTGTGCTTTGCAATGCCATAGATCCA    |
| DAP10            | NM_0010<br>07469.1 | 133-232       | ATCCTCTTCTGCTTTTGTCCCAGTGGCTGCAGCTCAGACGACTCCAGGAGAGAGAT<br>CATCACTCCCTGCCTTTTACCCTGGCACTTCAGGCTCTTGTT     |
| HDAC1            | NM_0049<br>64.2    | 786-885       | CAAGCCGGTCATGTCCAAAGTAATGGAGATGTTCCAGCCTAGTGCGGTGGTCTTACA<br>GTGTGGCTCAGACTCCCTATCTGGGGATCGGTTAGGTTGCTTC   |
| HDAC2            | NM_0015<br>27.1    | 931-1030      | AAGCCTATTATCTCAAAGGTGATGGAGATGTATCAACCTAGTGTGTGGTATTACAG<br>TGTGGTGCAGACTCATTATCTGGTGATAGACTGGGTTGTTTCA    |
| Hdac6            | NM_0060            | 537-636       | ATATATTGATCTGATGGAAACAACCCAGTACATGAATGAGGGAGAACTCCGTGTCTCT                                                 |

|                  |                    |               |                                                                                                           |
|------------------|--------------------|---------------|-----------------------------------------------------------------------------------------------------------|
|                  | 44.2               |               | AGCAGACACCTACGACTCAGTTTATCTGCATCCGAACCTACATC                                                              |
| HER2_scfv        | SCFV014.1          | 65-164        | CCTGCAGCGCCAGCAGCAGCGTGTCTACATGCACTGGTATCAGCAGAAGTCCGGCA<br>CTAGCCCCAAGCGGTGGATCTACGACACCTACAAGCTCGCCAG   |
| HERV-K_6H5_scfv  | SCFV012.1          | 138-237       | CGGCGGCACCAGCTACAACCAGAAGTTCAAGGACAAGGCCATCCTGACCGTGGACA<br>AGAGCAGCAGCACCCGCTACATGGAAGTGCAGGAGCCTGACCAGC |
| HLA-A            | NM_0021<br>16.5    | 1001-<br>1100 | GGAAGAGCTCAGATAGAAAAGGAGGGAGTTACACTCAGGCTGCAAGCAGTGACAG<br>TGCCAGGGCTCTGATGTGTCCCTCACAGCTTGAAAAGTGTGAGA   |
| Hmgb2            | NM_0011<br>30688.1 | 126-225       | CTGTCAACATGGGTAAAGGAGACCCCAACAAGCCGCGGGGCAAATGTCCTCGTAC<br>GCCTTCTTCGTGCAGACCTGCCGGGAAGAGCACAAGAAGAAACA   |
| nsg2             | NM_0159<br>80.3    | 366-465       | TCCTGTGCAGCCTGGCCCTAGCTTTCCTTGCCTGCATCGTGTTCCTGGTGGTTTACAAA<br>GCCTTACCTATGATCACAGCTGCCAGAGGGATTCTGCTA    |
| HopX             | NM_0011<br>45460.1 | 1118-<br>1217 | AACAATAGGAAGCTATGTGTATCTTCTGTGTAAGCAGTGGCTTCACTGGAAAAATG<br>GTGTGGCTAGCATTTCCTTTGAGTCATGATGACAGATGGTGT    |
| HOXA10           | NM_0189<br>51.3    | 1504-<br>1603 | TTCTATAGAGATAGATATTGTCCTAAGTGTCAAGTCTGACTGGGCTGGGTTTGCTGT<br>CTTGGGGTCCCCTGCTCGAAATGGCCCTGTCTTCGGCCGA     |
| HOXA9            | NM_1527<br>39.3    | 1016-<br>1115 | GGCTCTAAACCTCAGGCCACATCTTTTCCAAGGCAAACCTGTTTCAGGCTGGCTCGTA<br>GGCCTGCCGCTTTGATGGAGGAGGTATTGTAAGCTTTCCATT  |
| HOXB3            | NM_0021<br>46.4    | 61-160        | TGTCCGTTTAAATGCTGCTGGGAGACTCGTAAAAAATCATCGTGGACCTGGAGGAT<br>GAGAGGGGCGAGCTTTATTTTCGGTTCGGATTGCGGTGTGGTGGT |
| HOXB4            | NM_0240<br>15.4    | 1341-<br>1440 | CCTTTCTTTGTCCTCCACTCCCAGTACCCAGCGAAAGCACCTCTGACTGCCAGATAG<br>TGCAGTGTGGTTCACGGTAACACACACACTCTCCCTCA       |
| HPRT1            | NM_0001<br>94.1    | 241-340       | TGTGATGAAGGAGATGGGAGGCCATCACATTGTAGCCCTCTGTGTGCTCAAGGGGG<br>GCTATAAATTCTTTGCTGACCTGCTGGATTACATCAAAGCACTG  |
| HRH1             | NM_0008<br>61.2    | 3056-<br>3155 | GTGGCAGCTCAAAATGATATGTTTGTAGTAGACGAACAGCTGACATGGAGTTCCCGTG<br>CACCTACGGAAGGGGACGCTTTGAAGGAACCAAGTGCATTTTT |
| HRH2             | NM_0223<br>04.1    | 601-700       | GCGGTCTCATCTCATCACCGTTGCTGGCAATGTGGTCGTCTGTCTGGCCGTGGGCT<br>TGAACCGCCGCTCCGCAACCTGACCAATTGTTTCATCGTGT     |
| Human_CD19R_scfv | SCFV009.1          | 216-315       | CTTACCATCAGCAGCCTGCAGCCCAGGACATCGCCACCTACTACTGCCAGCAGTAC<br>CAGAGCCTGCCCTACACCTTCGGCCAGGGCACCAAGCTGCAG    |
| ICOS             | NM_0120<br>92.2    | 641-740       | AACTCTGGCACCCAGGCATGAAGCACGTTGGCCAGTTTTCTCAACTGAAGTGCAA<br>GATTCTCTTATTTCCGGGACCACGGAGAGTCTGACTTAACTAC    |
| ICOSLG           | NM_0152<br>59.4    | 1191-<br>1290 | CTGCTGGCGTTGGCTGTGATCCTGGAATGAGGCCCTTTCAAAGCGTCATCCACACC<br>AAAGGCAAATGTCCCAAGTGAGTGGGCTCCCCGCTGTCACTG    |
| ID2              | NM_0021<br>66.4    | 506-605       | CGGATATCAGCATCCTGTCTTGCAGGCTTCTGAATTCCTTCTGAGTTAATGTCAAAT<br>GACAGCAAAGCACTGTGTGGCTGAATAAGCGGTGTTTCATGA   |
| ID3              | NM_0021<br>67.3    | 196-295       | AGGAAGCCTGTTTGAATTTAAGCGGGCTGTGAACGCCAGGGCCGGCGGGGGCAG<br>GGCCGAGGCGGGCCATTTTGAATAAAGAGGCGTGCCTTCCAGGC    |
| INDO             | NM_0021<br>64.3    | 51-150        | CTATTATAAGATGCTCTGAAAACCTTTCAGACACTGAGGGGCACCAGAGGAGCAGAC<br>TACAAGAATGGCACACGCTATGGAAAACCTCTGGACAATCAGT  |
| IFNa1            | NM_0240<br>13.1    | 586-685       | ATCCCTCTTTTATCAACAACTTGAAGAAAGATTAAGGAGGAAGGAATAACATCT<br>GGTCCAACATGAAAACAATTCTTATTGACTCATAACACCAGGTC    |
| IFNG             | NM_0006<br>19.2    | 971-1070      | ATACTATCCAGTTACTGCCGTTTGAATAATGCCTGCAATCTGAGCCAGTGCTTTAA<br>TGGCATGTCAGACAGAAGTGAATGTGTGAGGTGACCCTGAT     |
| IFNGR1           | NM_0004<br>16.1    | 1141-<br>1240 | CCCGGGCAGCCATCTGACTCCAATAGAGAGAGAGAGTTCTTCACCTTTAAGTAGTAA<br>CCAGTCTGAACCTGGCAGCATCGCTTTAAACTCGTATCACTCC  |
| IGF1R            | NM_0008<br>75.2    | 456-555       | TCGGGGGGCCATCAGGATTGAGAAAAATGCTGACCTCTGTTACCTCTCCACTGTGGA<br>CTGGTCCCTGATCCTGGATGCGGTGTCCAATAACTACATTGTG  |
| IKZF1            | NM_0060<br>60.3    | 4486-<br>4585 | CCGCTGTGTACTACTGTGTGCCTAGATTCCATGCACTCTCGTTGTGTTTGAAGTAAAT<br>ATTGGAGACCGGAGGGTAACAGTTGGCCTGTTGATTACAGC   |
| IKZF2            | NM_0010<br>79526.1 | 946-1045      | CCATGTACCTCCTATGGAAGATTGTAAGGAACAAGAGCCTATTATGGACAACAATAT<br>TTCTCTGGTGCCTTTTGTAGAGACCTGCTGTCATAGAGAAGCTC |
| IL10             | NM_0005            | 231-330       | AAGGATCAGCTGGACAACCTGTTGTTAAAGGAGTCCTTGTGAGGACTTTAAGGGT                                                   |

|           |                 |               |                                                                                                           |
|-----------|-----------------|---------------|-----------------------------------------------------------------------------------------------------------|
|           | 72.2            |               | TACCTGGGTTGCCAAGCCTTGCTGAGATGATCCAGTTTTACC                                                                |
| IL10RA    | NM_0015<br>58.2 | 151-250       | TGCCCAGCCCTCCGTCTGTGTGGTTTGAAGCAGAATTTTCCACCACATCCTCCACTG<br>GACACCCATCCCAAATCAGTCTGAAAGTACCTGCTATGAAGT   |
| IL12A     | NM_0008<br>82.2 | 776-875       | CTTTCTAGATCAAACATGCTGGCAGTTATTGATGAGCTGATGCAGGCCCTGAATTC<br>AACAGTGAGACTGTGCCACAAAATCCTCCCTGAAGAACCG      |
| IL-12p40  | NM_0021<br>87.2 | 1436-<br>1535 | GCAAGGCTGCAAGTACATCAGTTTTATGACAATCAGGAAGAATGCAGTGTCTGATA<br>CCAGTGCCATCATACTTGTGATGGATGGGAACGCAAGAGAT     |
| IL12RB1   | NM_0055<br>35.1 | 1293-<br>1392 | AGGAAAAGTGTTACTACATTACCATCTTTGCCTCTGCGACCCCGAGAAGCTCACCTT<br>GTGGTCTACGGTCTGTCCACCTACCCTTTGGGGCAATGC      |
| IL12RB2   | NM_0015<br>59.2 | 1316-<br>1415 | CCTCCGTGGGACATTAGAATCAAATTTCAAAGGCTTCTGTGAGCAGATGTACCCTTT<br>ATTGGAGAGATGAGGGACTGGTACTGCTTAATCGACTCAGAT   |
| IL13      | NM_0021<br>88.2 | 517-616       | TTTCTTTCTGATGTCAAAAATGTCTTGGGTAGGCGGGAAGGAGGGTTAGGGAGGGG<br>TAAATTCCTTAGCTTAGACCTCAGCCTGTGCTGCCCGTCTTCA   |
| IL15      | NM_1721<br>74.1 | 1686-<br>1785 | AGGGTGATAGTCAAATTATGTATTGGTGGGGCTGGGTACCAATGCTGCAGGTCAAC<br>AGCTATGCTGGTAGGCTCTGCCAGTGTGGAACCACTGACTACT   |
| IL15Ra    | NM_0021<br>89.2 | 40-139        | CGCTCGCCCGGGGAGTCCAGCGGTGTCTGTGGAGCTGCCCCATGGCCCCGCGGC<br>GGGCGCGGGTCCCGGACCCTCGGTCTCCCGCGCTGCTACTG       |
| IL17A     | NM_0021<br>90.2 | 241-340       | TACTACAACCGATCCACCTCACCTTGGAAATCTCCACCGCAATGAGGACCCTGAGAGAT<br>ATCCCTCTGTGATCTGGGAGGCAAAGTGCCGCCACTTGGGCT |
| IL17F     | NM_0528<br>72.3 | 211-310       | GCCCGCTGTGCCAGGAGGTAGTATGAAGCTTGACATTGGCATCATCAATGAAAACC<br>AGCGCGTTTCCATGTACGTAACATCGAGAGCCGCTCCACCTC    |
| IL17RA    | NM_0143<br>39.4 | 3021-<br>3120 | CTACTATGTGGCGGGCATTGGGATACCAAGATAAATTGCATGCGGCATGGCCCCAG<br>CCATGAAGGAACTTAACCGCTAGTGCCGAGGACACGTTAAACG   |
| IL18      | NM_0015<br>62.2 | 49-148        | GACAGTCAGCAAGGAATTGTCTCCAGTGCATTTGCCCTCCTGGCTGCCAACTCTGG<br>CTGCTAAAGCGGCTGCCACCTGCTGCAGTCTACACAGCTTCG    |
| IL18R1    | NM_0038<br>55.2 | 2026-<br>2125 | GAATGAGGGGATTTAAGTGTCTGAAGAGGCATTTTCTAGGGACCAGTGGGTGACT<br>GAGTAACTGAAATGCTGCTTTCCTCCCTAACACCATGGATCTG    |
| IL18RAP   | NM_0038<br>53.2 | 2413-<br>2512 | GCTTGATGGACAATGGAGTGGGATTGAGACTGTGGTTAGAGCCTTTGATTTCTGG<br>ACTGGACTGACGGCGAGTGAATTCTTAGACCTTGGGTACTTT     |
| IL-1alpha | NM_0005<br>75.3 | 1086-<br>1185 | ACTCCATGAAGGCTGCATGGATCAATCTGTGTCTCTGAGTATCTCTGAAACCTCTAAA<br>ACATCCAAGCTTACCTTCAAGGAGAGCATGGTGGTAGTAGCA  |
| IL-1beta  | NM_0005<br>76.2 | 841-940       | GGGACCAAAGGCGGCCAGGATATAACTGACTTCACCATGCAATTTGTGTCTTCTTAA<br>AGAGAGCTGTACCCAGAGAGTCTGTGCTGAATGTGGACTCAA   |
| IL2       | NM_0005<br>86.2 | 301-400       | AGGATGCAACTCCTGTCTTGCACTTGCATAAGTCTTGCACTTGTACAAACAGTGCAC<br>CTACTTCAAGTTCTACAAAGAAAACACAGCTACAACCTGGAGC  |
| IL21R     | NM_0217<br>98.2 | 2081-<br>2180 | CGTGTGTGTGGTCAACAGATGACAACAGCCGTCCTCCCTCCTAGGGTCTTGTGTTGCA<br>AGTTGGTCCACAGCATCTCCGGGGCTTTGTGGGATCAGGGCA  |
| IL22      | NM_0205<br>25.4 | 320-419       | CTATCTGATGAAGCAGGTGCTGAACTCACCTTGAAGAAGTGTGTTCCCTCAATCT<br>GATAGGTTCCAGCCTTATATGCAGGAGGTGGTGCCTTCTCTG     |
| IL-23p19  | NM_0165<br>84.2 | 412-511       | CAGGGACAACAGTCAAGTCTGCTTGCAAAGGATCCACCAGGGTCTGATTTTTATGA<br>GAAGCTGCTAGGATCGGATATTTTACAGGGGAGCCTTCTCTG    |
| IL23R     | NM_1447<br>01.2 | 711-810       | AACTGCAAATTCACCTGGATGATATAGTGATACCTTCTGCAGCCGTCATTTCCAGGGC<br>TGAGACTATAAATGCTACAGTGCCCAAGACCATAATTTATTG  |
| IL27      | NM_1456<br>59.3 | 144-243       | CAGGAGCTGCGGAGGGAGTTCACAGTCAAGCTGCATCTCGCCAGGAAGCTGCTCTCC<br>GAGGTTCCGGGGCCAGGCCACCGCTTTGCGGAATCTCACCTGC  |
| IL2RA     | NM_0004<br>17.1 | 1001-<br>1100 | CTTGGAAGAAGCCGGGAACAGACAACAGAAGTCATGAAGCCCAAGTGAAATCAAA<br>GGTGCTAAATGGTCCGCCAGGAGACATCCGTTGTGCTTGCCTGC   |
| IL2RB     | NM_0008<br>78.2 | 1981-<br>2080 | GTCCTGCTGCCCAGCCAGGAAGTGTGTGTGTTGCAGGGGGGCGAGTAACTCCCAAC<br>TCCCTCGTTAATCACAGGATCCCACGAATTTAGGCTCAGAAGC   |
| IL2RG     | NM_0002<br>06.1 | 596-695       | CCACAGCTGGACTGAACAATCAGTGGATTATAGACATAAGTTCTCCTTGCCTAGTGTG<br>GATGGGCAGAAACGCTACACGTTTTCGTGTTCGGAGCCGCTTT |
| IL4       | NM_0005         | 626-725       | GACACTCGCTGCCTGGGTGCGACTGCACAGCAGTTCCACAGGCACAAGCAGCTGATC                                                 |

|       |                 |               |                                                                                                           |
|-------|-----------------|---------------|-----------------------------------------------------------------------------------------------------------|
|       | 89.2            |               | CGATTCTGAAACGGCTCGACAGGAACCTCTGGGGCCTGGCGG                                                                |
| IL4R  | NM_0004<br>18.2 | 706-805       | ATCATCTCACCTATGCAGTCAACATTTGGAGTGAAAACGACCCGGCAGATTTTCAGAAT<br>CTATAACGTGACCTACCTAGAACCCTCCCTCCGCATCGCAGC |
| IL5   | NM_0008<br>79.2 | 106-205       | CCACAGAAATCCCACAAGTGCATTGGTGAAAGAGACCTTGGCACTGCTTTCTACTCA<br>TCGAACTCTGCTGATAGCCAATGAGACTCTGAGGATTCCTGT   |
| IL6   | NM_0006<br>00.1 | 221-320       | TGACAAACAAATTCGGTACATCCTCGACGGCATCTCAGCCCTGAGAAAGGAGACATG<br>TAACAAGAGTAACATGTGTGAAAGCAGCAAAGAGGCACTGGCA  |
| IL6R  | NM_0005<br>65.2 | 994-1093      | CTTTCTACATAGTGTCCATGTGCGTCGCCAGTAGTGTGCGGAGCAAGTTCAGCAAAA<br>CTCAAACCTTTTCAGGGTTGTGGAATCTTGACGCTGATCCGCC  |
| IL7R  | NM_0021<br>85.2 | 1611-<br>1710 | TTGCTTTGACCACTCTTCTGAGTTTCAGTGGCACTCAACATGAGTCAAGAGCATCCTG<br>CTTCTACCATGTGGATTTGGTCACAAGGTTTAAGGTGACCCA  |
| IL9   | NM_0005<br>90.1 | 301-400       | AAGTACTAAAGAACAACAAGTGTCCATATTTTTCTGTGAACAGCCATGCAACCAAAC<br>CACGGCAGGCAACGCGCTGACATTTCTGAAGAGTCTTCTGGA   |
| Insm1 | NM_0021<br>96.2 | 1981-<br>2080 | AAGCCTCCCCTTGGCGGGGAGAAGCTTTTTTTCTTGCTAGTATTGCTGTGTTTCATGG<br>TCTAGAAATGCGGTCTGGTCTCGCCTCGCCTACCAATCTCTG  |
| IRF1  | NM_0021<br>98.1 | 511-610       | CTGTGCGAGTGTACCGGATGCTTCCACCTCTCACCAAGAACCAGAGAAAAGAAAGAA<br>AGTCGAAGTCCAGCCGAGATGCTAAGAGCAAGGCCAAGAGGAA  |
| IRF2  | NM_0021<br>99.2 | 1376-<br>1475 | CAGTACCTGGAGCTTCTCTTTAACTCAGGACTCCAGCCCATTGGTAGACGTGTGTTTC<br>TAGAGCCTGCTGGATCTCCAGGGCTACTCACTCAAGTTCAA   |
| IRF4  | NM_0024<br>60.1 | 326-425       | GGGCACTGTTTAAAGGAAAGTTCGAGAAGGCATCGACAAGCCGGACCTCCCACCT<br>GGAAGACGCGCCTGCGGTGCGCTTTGAACAAGAGCAATGACTT    |
| Irf5  | NM_0022<br>00.3 | 1846-<br>1945 | GCCTGGCTCTCGGGAAATTCAGCCATGAGCAGGGAAAGAACTCTCCCAACCCTGGG<br>GCCTAGCTGTATAGGAGGAATTGCCTAAGGGTGGCCCACTCTTG  |
| Irf7  | NM_0015<br>72.3 | 1764-<br>1863 | CGCAGCGTGAGGGTGTGTCTTCCCTGGATAGCAGCAGCCTCAGCCTCTGCCTGTCCA<br>GCGCCAACAGCCTCTATGACGACATCGAGTGCTTCTTATGGA   |
| ITCH  | NM_0314<br>83.4 | 156-255       | ACTGTGAGAACTTCAGGTTTTCCAACCTATTGGTGGTATGTCTGACAGTGGATCACAA<br>CTTGGTTCAATGGGTAGCCTCACCATGAAATCACAGTTCAG   |
| ITGA1 | NM_1815<br>01.1 | 1876-<br>1975 | AAGTGGCAAGACTATAAGGAAAGAGTATGCACAACGTATTCCATCAGGTGGGGATG<br>GTAAGACACTGAAATTTTTGGCCAGTCTATCCACGGAGAAATG   |
| ITGA4 | NM_0008<br>85.4 | 976-1075      | GCCCACTGCCAACTGGCTCGCCAACGCTTCAGTGATCAATCCCGGGGCGATTTACAG<br>ATGCAGGATCGGAAAGAATCCCGGCCAGACGTGCGAACAGCTC  |
| ITGA5 | NM_0022<br>05.2 | 926-1025      | AGAAGACTTTGTTGCTGGTGTGCCCAAAGGGAACTCACTTACGGCTATGTCACCAT<br>CCTTAATGGCTCAGACATTCGATCCCTCTACAACCTTCTCAGGG  |
| ITGAL | NM_0022<br>09.2 | 3906-<br>4005 | GTGAGGGCTTGTCAATACCAGACGGTTCACCAGCCTCTCTTGTTTCCTTCTTGGAA<br>GAGAATGTCTGATCTAAATGTGGAGAACTGTAGTCTCAGGA     |
| CD11b | NM_0006<br>32.3 | 516-615       | GCCCTCCGAGGGTGTCTCAAGAGGATAGTGACATTGCCTTCTTGATTGATGGCTCT<br>GGTAGCATCATCCACATGACTTTCGGCGGATGAAGGAGTTTG    |
| CD11c | NM_0008<br>87.3 | 701-800       | CCCCTCAGCCTGTTGGCTTCTGTTACCAGCTGCAAGGGTTACATACACGGCCACCG<br>CCATCCAAAATGTCGTGCACCGATTGTTCCATGCCTCATATG    |
| ITGB1 | NM_0336<br>66.2 | 2001-<br>2100 | TTTTAACATTACCAAGGTAGAAAGTCGGGACAAATTACCCAGCCGGTCCAACCTGA<br>TCCTGTGTCCATTGTAAGGAGAAGGATGTTGACGACTGTTGG    |
| ITGB7 | NM_0008<br>89.1 | 1279-<br>1378 | CAACGTGGTACAGCTCATCATGGATGCTTATAATAGCCTGTCTCCACCGTGACCCTT<br>GAACACTCTTCACTCCCTCCTGGGGTCCACATTTCTTACGAA   |
| ITK   | NM_0055<br>46.3 | 3431-<br>3530 | GCCAGTAAAGAAGTCAGTATAGAACCCTAGCGAATAGTGTGCTCTGGCACAGACC<br>ACTGTGGTTGATGGCATGGCCCTCCAACCTTGAATAGGATTTT    |
| JAK1  | NM_0022<br>27.1 | 286-385       | GAGAACACCAAGCTCTGGTATGCTCCAAATCGACCATCACCGTTGATGACAAGATG<br>TCCCTCCGGCTCCACTACCGGATGAGGTTCTATTTACCAATT    |
| JAK2  | NM_0049<br>72.2 | 456-555       | CTCCTCCCGCAGCGCAAATGTTCTGAAAAAGACTCTGCATGGGAATGGCCTGCCTT<br>ACGATGACAGAAATGGAGGGAACATCCACCTCTTCTATATATC   |
| JAK3  | NM_0002<br>15.2 | 1716-<br>1815 | GTGCTGCTGAAGGTCATGGATGCCAAGCACAAGAACTGCATGGAGTCATTCTGGGA<br>AGCAGCGAGCTTGTGAGCCAAGTGTGCTACCGGCATCTCGTGC   |
| AP1   | NM_0022         | 141-240       | ACACAGCCAGCCAGCCAGGTCGGCAGTATAGTCCGAACTGCAAATCTATTTTCTTTT                                                 |



|                               |                    |               |                                                                                                           |
|-------------------------------|--------------------|---------------|-----------------------------------------------------------------------------------------------------------|
|                               | 28.3               |               | CACCTTCTCTCTAACTGCCAGAGCTAGCGCCTGTGGCTCCC                                                                 |
| JunB                          | NM_0022<br>29.2    | 1156-<br>1255 | GCGCGCCTGGAGGACAAGGTGAAGACGCTCAAGGCCGAGAACCGGGGCTGTCTGA<br>GTACCGCCGGCCTCCTCCGGGAGCAGGTGGCCAGCTCAAACAGA   |
| KIAA0101                      | NM_0147<br>36.4    | 66-165        | TGTCCAGTGA AACACCCTCGGCTGGGAAGTCAGTTCTCTCTCTCTCTCTCTCTCT<br>GTTTGAACATGGTGCGGACTAAAGCAGACAGTGTTCAGGC      |
| KIR2DL1<br>(NKAT1)/CD<br>158a | NM_0142<br>18.2    | 882-981       | GCAGGAAACAGAACAGCGAATAGCGAGGACTCTGATGAACAAGACCCTCAGGAGGT<br>GACATACACACAGTTGAATCACTGCGTTTTTCACACAGAGAAAAA |
| KIR2DL2<br>(NKAT6)/CD<br>158b | NM_0142<br>19.2    | 815-914       | TCTCCTTCATCGCTGGTGCTCCAACAAAAAATGCTGCGGTAATGGACCAAGAGTC<br>TGCAGGGAACAGAACAGCGAATAGCGAGGACTCTGATGAACAA    |
| KIR2DL3<br>(NKAT2)/CD<br>158b | NM_0158<br>68.2    | 742-841       | CTCCGAAACCGGTAACCCAGACACCTGCATGTTCTGATTGGGACCTCAGTGGTCATC<br>ATCCTCTTCATCCTCCTCCTCTTTCTCCTTCATCGCTGG      |
| KIR2DL4<br>(p49<br>CD158d)    | NM_0010<br>80770.1 | 842-941       | TTGGATCACTGCATTTTCACACAGAGAAAAATCACTGGCCCTTCTCAGAGGAGCAAG<br>AGACCCTCAACAGATACCAGCGTGTGTATAGA ACTTCCAAATG |
| KIR2DL5A                      | NM_0205<br>35.3    | 1452-<br>1551 | GACACGTGCTGTTCCACCTTCCCTCATGCTGTTTACCTTTCTCAGACTATTTCCAGC<br>CTTCTGTGAGTCAGCAGTGA AACTTATAAAATTTTTGTG     |
| KIR2DS1                       | NM_0145<br>12.1    | 699-798       | CTTCAACCACTGAACCAAGCTCCGAAACCGGTAACCCAGACACCTACATGTTCTGAT<br>TGGGACCTCAGTGGTCAAATCCCTTTCACCATCCTCCTCT     |
| KIR2DS2<br>(NKAT5)/CD<br>158b | NM_0123<br>12.2    | 857-956       | CAAGAGCCTGCAGGGAACAGAACAGTGAACAGCGAGGATTCTGATGAACAAGACCA<br>TCAGGAGGTGTCATACGCATAATTGGATCACTGTGTTTTACAC   |
| KIR2DS3<br>(NKAT7)            | NM_0123<br>13.1    | 694-793       | GGCCTTCAACCACTGAACCAAGCTCCAAAACCGGTAACCCAGACACCTACACGTTCT<br>GATTGGGACCTCAGTGGTCAAACCTCCCTTTCACCATCCTCCT  |
| KIR2DS4<br>(NKAT8)            | NM_0123<br>14.3    | 1428-<br>1527 | ACATACAAGAGGCTGCCTTTAACACAGCACTTAGACACGTGCTGTTCCACCTCCCTT<br>CAGACTATCTTTCAGCCTTCTGCCAGCAGTAAACTTATAAA    |
| KIR2DS5<br>(NKAT9)            | NM_0145<br>13.2    | 205-304       | CTTCTTCTGCACAGAGAGGGGACGTTTAAACCACTTTGCGCCTCATTGGAGAGCA<br>CATTGATGGGGTCTCCAAGGGCAACTTCTCCATCGGTGCGATG    |
| KIR3DL1<br>(NKAT3/NKB<br>1)   | NM_0132<br>89.2    | 1055-<br>1154 | CCAAATCTGGTAACCCAGACACCTGCACATTCTGATTGGGACCTCAGTGGTCATCAT<br>CCTCTTCATCCTCCTCCTCTTTCTCCTTCATCTCTGGTG      |
| KIR3DL2<br>(NKAT4)            | NM_0067<br>37.2    | 885-984       | TGCCACCCACGGAGGGACCTACAGATGCTTCGGCTCTTCCGTGCCCTGCCCTGCGTG<br>TGGTCAAACCTCAAGTGACCCACTGCTTGTCTGTGTCACAGGA  |
| KIR3DL3<br>(KIRC1<br>CD158z)  | NM_1534<br>43.3    | 509-608       | CCTTGCGCCTCGTTGGACAGCTCCACGATGCGGGTCCAGGTCAACTATTCCATGG<br>GTCCCATGACACCTGCCCTTGAGGGACCTACAGATGCTTTGG     |
| KIR3DS1<br>(NKAT10)           | NM_0010<br>83539.1 | 1001-<br>1100 | CTCAAATCTGGTAACCTCAGACACCTGCACATTCTGATTGGGACCTCAGTGGTCAAA<br>ATCCCTTTCACCATCCTCCTCTTTCTCCTTCATCGCTGG      |
| KIT                           | NM_0002<br>22.2    | 2645-<br>2744 | GGTCTATGGGATTTTTCTTTGGGAGCTGTTCTCTTTAGGAAGCAGCCCTATCCTGG<br>AATGCCGGTTCGATTCTAAGTTCTACAAGATGATCAAGGAAGG   |
| KLF10                         | NM_0056<br>55.1    | 571-670       | GCTCAGGCAACAAGTGTGATTCTGCATACAGCTGATGCCAGCTATGTAACCACAG<br>ACCTGCCAATGAAAGCAGCCAGCATCCTCAACTATCAGAACA     |
| Klf12                         | NM_0072<br>49.4    | 951-1050      | TGACCTGCCAAATGTGACCTTAGATAGCGTTAATGAAACTGGATCTACGGCCCTTCC<br>ATAGCCAGAGCAGTACAAGAGGTACATCCGTCCCCAGTATCA   |
| Klf2                          | NM_0162<br>70.2    | 1016-<br>1115 | GGAAGTTTGC GCGCTCAGACGAGCTCACGCGCCACTACCGAAAGCACACGGGCCAC<br>CGGCCATTCCAGTGCCATCTGTGCGATCGTGCTTCTCGCGCTC  |
| klf3                          | NM_0165<br>31.3    | 276-375       | ACCAGAGCACCTAGAAAGTTTAACTAAAAGAATGCTCATGTTTGACCCAGTTCTGT<br>CAAGCAAGAGGCCATGGACCCTGTCTCAGTGTACATCCCATC    |
| KLF4                          | NM_0042<br>35.4    | 1981-<br>2080 | CGAGCATTTTCCAGGTGCGACCCTCGCCTTACACATGAAGAGGCATTTTTAAATCC<br>CAGACAGTGGATATGACCCCACTGCCAGAAGAGAATTCAGT     |

|                     |                    |               |                                                                                                            |
|---------------------|--------------------|---------------|------------------------------------------------------------------------------------------------------------|
| KLF6                | NM_0010<br>08490.1 | 1166-<br>1265 | GGGATGCGTGTTCAGCCAAAGCATGCCGTTCTGCACCCTACCCAGTTGCCTCCAGG<br>GCCTCTCCTTGGAAAGTCTTTTGAGGGCTAAAAAGGTCCTGTA    |
| KLF7                | NM_0012<br>70943.1 | 1547-<br>1646 | GTACTATTGAGATCTTTTCGCGTCGATCCCAACGGCCTTAGCGGCGGCAGACTGGAAT<br>AACACCTTACACCTTTCTGGCCTGCATTTCTGTAGACTTCACT  |
| Klra5<br>(Ly49E)    | NR_02804<br>5.1    | 415-514       | CCTTCAGAGTCACAGAATAGATTAAGGCCTGATGATACTCAAAGGCCTGGGAAA<br>GATGACAAAGAATTTTCAGTGCCCTGGCACCTCATTGCAGTGA      |
| KLRB1               | NM_0022<br>58.2    | 86-185        | TGAGTTAAACTTACCCACAGACTCAGGCCAGAAAAGTTCTTACCTTCATCTCTTCTC<br>GGGATGTCTGTCAGGGTTCACCTTGGCATCAATTTGCCCTG     |
| KLRC1               | NM_0022<br>59.3    | 336-435       | ACCTATCACTGCAAAGATTTACCATCAGCTCCAGAGAAGCTCATTGTTGGGATCCTGG<br>GAATTATCTGTCTTATCTTAATGGCCTCTGTGGTAACGATAG   |
| NKG2C               | NM_0022<br>60.3    | 943-1042      | TATGTGAGTCAGCTTATAGGAAGTACCAAGAACAGTCAAACCCATGGAGACAGAAA<br>GTAGAATAGTGTTGCCAATGTCTCAGGGAGGTTGAAATAGGAG    |
| NKG2E               | NM_0022<br>61.2    | 761-860       | ACTCCTGAGCTCAAGAAATCAACACATCTTGGCCTCCCAAGTTGCTGGGATTACTGAC<br>ACAAGCCACCGCCCTGAGTGCTCATGTACCATTTAGCTTGT    |
| NKG2F               | NM_0134<br>31.2    | 277-376       | CAGGAACCAAACAGGAAATATTCCAAGTAGAATTAACCTTCAAATGCTTCTTCGG<br>ATCATCAAGGGAATGACAAGACATATCACTGCAAAGGTTTACT     |
| KLRD1<br>(CD94)     | NM_0022<br>62.3    | 543-642       | AGCCTGCTTCAGCTTCAAACACAGATGAACTGGATTTTATGAGCTCCAGTCAACAAT<br>TTTACTGGATTGGACTCTTACAGTGAGGAGCACACCCGCT      |
| NKp80               | NM_0165<br>23.1    | 276-375       | AAAAAGGAAGTTGTTCAAATGCCACTCAGTATGAGGACACTGGAGATCTAAAAGTG<br>AATAATGGCACAAGAAGAAATATAAGTAATAAGGACCTTTGTGC   |
| KLRG1               | NM_0058<br>10.3    | 66-165        | CAGAATGACTATGGACCACAGCAAAAATCTTCTCTTCCAGGCCTTCTTGTCTTGCCT<br>TGTGGCAATAGCTTTGGGGCTTCTGACTGCAGTTCTTCTGA     |
| NKG2D               | NM_0073<br>60.1    | 761-860       | GGACCAGGATTTACTTAAACTGGTGAAGTCATATCATTGGATGGGACTAGTACACAT<br>TCCAACAAATGGATCTTGGCAGTGGGAAGATGGCTCCATTCTC   |
| CD223<br>(LAG3)     | NM_0022<br>86.5    | 1736-<br>1835 | CTTTTGGTGACTGGAGCCTTTGGCTTTACCTTTGGAGAAGACAGTGGCGACCAAGA<br>CGATTTTCTGCCTTAGAGCAAGGGATTACCCCTCCGACGGCTC    |
| LAIR1               | NM_0022<br>87.3    | 1196-<br>1295 | GCACCTGAGGGTAGAAAGTCACTCTAGGAAAAGCCTGAAGCAGCCATTTGGAAGGC<br>TTCCTGTTGGATTCTTCTCATCTAGAAAGCCAGCCAGGCAGCT    |
| CD208 (DC-<br>LAMP) | NM_0143<br>98.3    | 1401-<br>1500 | GGTCTCTGCCTTATGGGTATGGGTGTCTATAAAATCCGCCTAAGGTGTCAATCATCTG<br>GATACCAGAGAATCTAATTGTTGCCCGGGGGAATGAAAATA    |
| Lat                 | NM_0010<br>14987.1 | 1291-<br>1390 | TGTGTAATAGAATAAAGGCCTGCGTGTGTCTGTGTTGAGCGTGCGTCTGTGTGTGCC<br>TGTGTGCGAGTCTGAGTCAGAGATTTGGAGATGTCTCTGTGTG   |
| Lat2                | NM_0141<br>46.3    | 1864-<br>1963 | TGCAGAGCTGATTAACAGTGTGTGACTGTCTCATGGGAAGAGCTGGGGCCCAGA<br>GGGACCTTGAGTCAGAAATGTTGCCAGAAAAAGTATCTCCTCCA     |
| LCK                 | NM_0053<br>56.2    | 1261-<br>1360 | ATTAAGTGGACAGCGCCAGAAGCCATTAACACTACGGGACATTACCCATCAAGTCAGAT<br>GTGTGGTCTTTTGGGATCCTGCTGACGGAAATTGTCACCCACG |
| LDB2                | NM_0012<br>90.3    | 196-295       | CTCTGTGTGTGTGAGCGTGTGTGCGTGCCTACTTTGTAAGGAGGAAACACAG<br>CCCATGTGCTCTGCATGGACGTTACTGATACTCTGTTAGCTT         |
| LDHA                | NM_0055<br>66.1    | 986-1085      | CAGAATGGAATCTCAGACCTTGTGAAGGTGACTCTGACTTCTGAGGAAGAGGCCCGT<br>TTGAAGAAGAGTGCAGATACACTTTGGGGGATCCAAAAGGAGC   |
| Lef1                | NM_0162<br>69.3    | 1166-<br>1265 | CCGTCACACATCCCATCAGATGTCAACTCAAACAAGGCATGTCCAGACATCCTCCAG<br>CTCCTGATATCCCTACTTTTTATCCCTTGTCTCCGGGTGGTG    |
| Lgals1              | NM_0023<br>05.3    | 61-160        | GGTGCGCCTGCCCGGAACATCCTCCTGGACTCAATCATGGCTTGTGGTCTGGTCCG<br>CAGCAACCTGAATCTCAAACCTGGAGAGTGCCTTCGAGTGCAG    |
| LGALS3              | NM_0023<br>06.2    | 121-220       | CAGCCGTCCGGAGCCAGCCAACGAGCGGAAAATGGCAGACAATTTTCGCTCCATGA<br>TGCGTTATCTGGGTCTGGAAACCCAAACCCTCAAGGATGGCCT    |
| CD118               | NM_0023<br>10.3    | 2996-<br>3095 | CCTATTGTCCACCCATCATTGAGGAAGAAATACCAAACCCAGCCGAGATGAAGCTG<br>GAGGGACTGCACAGGTTATTTACATTGATGTTTCAGTCGATGTA   |
| CD85/LILRB<br>1     | NM_0010<br>81637.1 | 2333-<br>2432 | AGCTGAGAAAATAAGTCAGAAAGTGCATTAACCTGAATCACAATGTAAATATTACA<br>CATCAAGCGATGAAACTGGAAAATAACAAGCCACGAATGAATG    |
| Lmo2                | NM_0055<br>74.3    | 1416-<br>1515 | AAGCATTTCTGTGTAGGTGACAGATACCTCCTCATCAACTCTGACATAGTGTGCGAAC<br>AGGACATCTACGAGTGGACTAAGATCAATGGGATGATATAGG   |

|        |                    |               |                                                                                                             |
|--------|--------------------|---------------|-------------------------------------------------------------------------------------------------------------|
| LRP5   | NM_0023<br>35.1    | 2516-<br>2615 | TGGACACCAACATGATCGAGTCGTCCAACATGCTGGGTGAGGAGCGGGTCTGTGATT<br>GCCGACGATCTCCCGCACCCGTTCCGGTCTGACGACAGTACAGCGA |
| LRP6   | NM_0023<br>36.1    | 2186-<br>2285 | CTTAGATTATCCAGAAGGCATGGCAGTAGACTGGCTTGGGAAGAACTGTACTGGGC<br>AGACACAGGAACGAATCGAATTGAGGTGTCAAAGTTGGATGGG     |
| LRRC32 | NM_0055<br>12.2    | 3471-<br>3570 | CACCCTGGTGTGGGTTCTCCTGTTCTCTGTGCTCTTGCACTTCTCATTCCCTTTTCC<br>TCTATTGAGCAGAGCCTGGAGTTGAGACTATGGAATCCA        |
| LRRN3  | NM_0010<br>99660.1 | 2941-<br>3040 | GTCTTGGAGGCCTTCTGGGGATTATTGGTGTGATATGTCTTATCAGCTGCCTCTCTCC<br>AGAAATGAACTGTGATGGTGGACACAGCTATGTGAGGAATTA    |
| LTA    | NM_0005<br>95.2    | 886-985       | CTGATCAAGTCACCGGAGCTTTCAAAGAAGGAATTCTAGGCATCCCAGGGGACCACA<br>CCTCCCTGAACCATCCCTGATGTCTGTCTGGCTGAGGATTTCA    |
| LTbR   | NM_0023<br>42.1    | 1436-<br>1535 | CTAACAGGGGCCAAGGAACCAATTTATCACCCATGACTGACGGAGTCTGAGAAAA<br>GGCAGAAGAAGGGGGGCACAAGGGCACTTTCTCCCTTGAGGCTG     |
| Lyn    | NM_0023<br>50.1    | 1286-<br>1385 | TCCTGAAGAGCGATGAAGGTGGCAAAGTGCTGCTTCCAAAGCTCATTGACTTTTTCTG<br>CTCAGATTGCAGAGGGAATGGCATAACATCGAGCGGAAGAACTA  |
| MAD1L1 | NM_0035<br>50.2    | 307-406       | GAAGACCTGGGGGAAAACACCATGGTTTTATCCACCCTGAGATCTTTGAACAACCTC<br>ATCTCTCAGCGTGTGGAGGGAGGCTCTGGACTGGATATTTCTA    |
| Maf    | NM_0010<br>31804.2 | 6161-<br>6260 | TTCCAATTACAGAAGTGGAGCCACTCGCAAGTTGGAGCCATCAGTGGGATACGCCAC<br>ATTTTGGAAAGCCCCAGCATCGTGTACTTACCAGTGTGTTTACA   |
| MAP2K1 | NM_0027<br>55.2    | 971-1070      | ACGGAATGGACAGCCGACCTCCCATGGCAATTTTTGAGTTGTTGGATTACATAGTCA<br>ACGAGCCTCCTCCAAAACCTGCCAGTGGAGTGTTCAGTCTGGA    |
| MAPK14 | NM_0013<br>15.1    | 451-550       | TGGGCTCTGGCGCCTATGGCTCTGTGTGTGCTGCTTTTGACACAAAACGGGGTTAC<br>GTGTGGCAGTGAAGAAGCTCTCCAGACCATTTTCAGTCCATCAT    |
| MAPK3  | NM_0027<br>46.2    | 581-680       | AACGTGCTCCACCAGATCTAAAGCCCTCAACCTGCTCATCAACACCACCTGCGACC<br>TTAAGATTTGTGATTTCCGGCTGGCCCGGATTGCCGATCCTG      |
| MAPK8  | NM_1390<br>49.1    | 946-1045      | TCTCTGTAGATGAAGCTCTCCAACACCCGTACATCAATGTCTGGTATGATCCTTCTGA<br>AGCAGAAGTCCACCACCAAAGATCCCTGACAAGCAGTTAGA     |
| MBD2   | NM_0039<br>27.3    | 2016-<br>2115 | ATTTACATTTCAACTCTGATCCCTGGGCCTTAGGTTTGACATGGAGGTGGAGGAAGAT<br>AGCGCATATATTTGCAGTATGAACTATTGCCTCTGGACGTTGT   |
| MCL1   | NM_0219<br>60.3    | 1261-<br>1360 | GCTGTAACCTCCTAGAGTTGCACCCTAGCAACCTAGCCAGAAAAGCAAGTGGCAAGA<br>GGATTATGGCTAACAAAGAATAAATACATGGGAAGAGTGCTCCC   |
| MIF    | NM_0024<br>15.1    | 320-419       | TCCTACAGCAAGCTGCTGTGCGCCTGCTGGCCGAGCGCCTGCGCATCAGCCCGGAC<br>AGGGTCTACATCAACTATTACGACATGAACGCGGCAATGTGG      |
| MMP14  | NM_0049<br>95.2    | 1471-<br>1570 | GACAAGATTGATGCTGCTCTTCTGGATGCCAATGAAAAGACCTACTTCTTCCGTG<br>GAAACAAGTACTACCGTTTCAACGAAGAGCTCAGGGCAGTGG       |
| MPL    | NM_0053<br>73.2    | 896-995       | CAGTGGCACTTGGACTGCAATGCTTTACCTTGGACCTGAAGAATGTTACCTGTCAATG<br>GCAGCAACAGGACCATGCTAGCTCCCAAGGCTTCTTCTACCA    |
| mTOR   | NM_0049<br>58.2    | 5096-<br>5195 | TTAGTGTGCTCCTGGGAGTTGATCCGTCTCGGCAACTTGACCATCCTCTGCCAACAG<br>TTCACCCTCAGGTGACCTATGCCTACATGAAAAACATGTGGA     |
| MAD    | NM_0023<br>57.2    | 881-980       | GAGAATAAAGCTGCAGGACAGTCAAAAGCGTGTCTTGGTCTTAAGAGAGTGGGC<br>ACTGCGGCTGTCTCCTTGAAGTTCTCCCTGTTGGTTCTGATTA       |
| MYB    | NM_0053<br>75.2    | 3146-<br>3245 | AACTGTTGCATGGATCCTGTGTTTGAACCTGGGAGACAGAACTGTGGTTGATAGC<br>CAGTCACTGCCTTAAAGAACATTTGATGCAAGATGGCCAGCACT     |
| MYBL1  | NM_0010<br>80416.2 | 1431-<br>1530 | GCCGTGGAGGCAAACGCTGTGTTATCCTCTTTGCAGACCATCCAGAATTTGCAGAG<br>ACTCTAGAACTTATTGAATCTGATCCTGTAGCATGGAGTGACG     |
| Myc    | NM_0024<br>67.3    | 1611-<br>1710 | TCGGACACCGAGGAGAATGTCAAGAGGCGAACACACAACGTCTTGGAGCGCCAGAG<br>GAGGAACGAGCTAAAACGGAGCTTTTTTGCCTGCGTGACCAGA     |
| Mycl1  | NM_0010<br>33081.2 | 569-668       | GCAGGGAGCGGACATGGACTACGACTCGTACCAGCACTATTTCTACGACTATGACTG<br>CGGGGAGGATTTCTACCGCTCCACGGCGCCAGCGAGGACATC     |
| Mycn   | NM_0053<br>78.4    | 1546-<br>1645 | AAGGCCGCCAAGGTGGTCATTTTGA AAAAAGGCCACTGAGTATGTCCACTCCCTCCAG<br>GCCGAGGAGCACCAGCTTTTGTGGAAAAGGAAAAATTGCAGG   |
| myo3b  | NM_0010<br>83615.1 | 216-315       | GACACCTGGGAAATTATAGAGACCATTGGTAAAGGCACCTATGGCAAAGTCTACAAG<br>GTAACATAACAAGAGAGATGGGAGCCTGGCTGCAGTGAAAATTC   |

|                  |                    |               |                                                                                                          |
|------------------|--------------------|---------------|----------------------------------------------------------------------------------------------------------|
| MYO6             | NM_0049<br>99.3    | 6656-<br>6755 | AAGTTGGGGAGATGGCACCTTCTCAGAGGATTGTGAAAATATGAGGAAGAAACAAA<br>ACAGTGCATGTAGGAGCACAGGGCCACACAAAGGCATTCTATTG |
| Nab1             | NM_0059<br>66.3    | 250-349       | GTTTTACATGGAAGTGGCTTACAGAACTTGGCGCTGAGGTGCAGGGAAGCCAGAA<br>ACTCTTTGTGTCTCTAAGGCCGATGAGGAATTTGAAACACATG   |
| Nab2             | NM_0059<br>67.3    | 1206-<br>1305 | GAGCGTTGGGCACATCTTTGAGATGGATGATAATGACAGCCAGAAGGAAGAGGAGA<br>TCCGCAAATACAGCATCATCTATGGCCGTTTCGACTCTAAGCGG |
| Nanog            | NM_0248<br>65.2    | 1101-<br>1200 | CTACTCCATGAACATGCAACCTGAAGACGTGTGAAGATGAGTAAAAGTATATTACT<br>CAATTTAGTCTGGACACTGGCTGAATCCTTCTCTCCCCTCC    |
| NBEA             | NM_0156<br>78.3    | 8646-<br>8745 | CTGAGAGCCCTGAAGGACCAGAAAAGTCTTATTCCCACGCTTGATATCTGTCTCCA<br>GCGAAGGCCACTGTATCATATACTATGAACGAGGGCGATTCA   |
| NCAM1            | NM_0006<br>15.5    | 1621-<br>1720 | GGTATTTGCCTATCCCAGTGCCACGATCTCATGGTTTCGGGATGGCCAGCTGCTGCCA<br>AGCTCCAATTACAGCAATATCAAGATCTACAACACCCCTCT  |
| NCL              | NM_0053<br>81.2    | 1493-<br>1592 | GAACAGAGATCGATGGGCGATCTATTTCCCTGTAATACTGGAGAGAAAGGTCAAA<br>ATCAAGACTATAGAGGTGGAAGAATAGCACTTGGAGTGGTGA    |
| NKp46<br>(CD335) | NM_0011<br>45457.1 | 146-245       | TTTCATGGTTCCAAAGGAAAAGCAAGTGACCATCTGTTGCCAGGGAAATTATGGGGC<br>TGTTGAATACCAGCTGCACTTTGAAGGAAGCCTTTTTGCCGTG |
| NKp44<br>(CD336) | NM_0048<br>28.3    | 307-406       | ACGATGGCTTGGACCTCTCGATTACAATCTGGGACGACCCTGATGCTGGCTTCTTCA<br>CTGTCACCATGACTGATCTGAGAGAGGAAGACTCAGGACATT  |
| NKp30<br>(CD337) | NM_1471<br>30.1    | 51-150        | GCATCTGTCTCTCTCCTCAGGGAGGCAAGCATTGATGCTCGAGGTCCCTGGCAGTT<br>GTGGTCTTGGCAAGTATGTGTGAGTCCCCTGTGTCATAGG     |
| CYORF14          | NR_00154<br>4.2    | 144-243       | GAGGCTGTCTGCCAACATCTTTCATCACTCTGCCTGCAACTATGAAAAATTTAGTTCTA<br>AAAAATGCAACCTTGCTAAATTGAGTACTAATAGGATTGGT |
| Neil1            | NM_0246<br>08.2    | 1676-<br>1775 | TTAGCAGGAGGCTCTCCTTGCTTGCCTCACCCTTCTTATTGTCTTGCCTGCATCTG<br>GGGGTCTGAATTTTTGGGAGCAGGCAATATCTGAAGGTGCA    |
| Neil2            | NM_1450<br>43.2    | 2571-<br>2670 | GCCCGGTGGTGTGTAGAGAAAAGCTGCTTGTACTCTTAAGTCAATGTATTGGTG<br>ACTGTTGATTTGTTGAACAATCAGGAATCAAGGGCTGTGGAG     |
| NFAT5            | NM_1732<br>14.1    | 3291-<br>3390 | CCCTGACAACCTATTCAAACCCAGGACATCTCACAGCCTGGTACTTTTCCAGCAGTTTCT<br>GCTTCTAGTCAGCTGCCAACAGCGATGCACTATTGCAGCA |
| NFATC1           | NM_1723<br>90.1    | 2511-<br>2610 | CCAGTACCAGCGTTTACCTACCTTCCCGCCAACGGTAACGCCATCTTCTAACCCTA<br>AGCCGTGAACATGAGCGCGTGGGGTGCTTTTTCTAAAGACGC   |
| NFATC2           | NM_0123<br>40.3    | 1816-<br>1915 | GACGGACATTGGAAGAAAGAACACGCGGGTGAGACTGGTTTTCCGAGTTCACATCC<br>CAGAGTCCAGTGGCAGAATCGTCTTTACAGACTGCATCTAAC   |
| NFATC3           | NM_0045<br>55.2    | 2191-<br>2290 | GTCCTTGAAGTTCCTCCATATCATAACCCAGCAGTTACAGCTGCAGTGCAGGTGCACT<br>TTTATCTTTGCAATGGCAAGAGGAAAAAAGCCAGTCTCAAC  |
| Nfix             | NM_0025<br>01.2    | 586-685       | AAGAACTGGATCTTTATCTGGCTTACTTTGTCCACACTCCGGAATCCGGACAATCAGA<br>TAGTTCAAACCAGCAAGGAGATGCGGACATCAAACCACTGCC |
| NFkB             | NM_0011<br>65412.1 | 2306-<br>2405 | CTTGGGTAACCTCTGTTTTGCACCTAGCTGCCAAGAAGGACATGATAAAGTTCTCAGT<br>ATCTTACTCAAGCACAAAAGGCAGCACTACTTCTTGACCAC  |
| NKG7             | NM_0056<br>01.3    | 633-732       | CTGTGGCGGTCCCCGTCCTGGCTATGAAACCTTGTGAGCAGAAGGCAAGAGCGGCA<br>AGATGAGTTTTGAGCGTTGATTCCAAAGGCCTCATCTGGAGCC  |
| NOS2             | NM_0006<br>25.4    | 606-705       | TTGCCTGGGGTCCATTATGACTCCCAAAAGTTTGACCAGAGGACCCAGGGACAAGCC<br>TACCCCTCCAGATGAGCTTCTACCTCAAGCTATCGAATTTGTC |
| Notch1           | NM_0176<br>17.3    | 736-835       | CTGCCAGGCTTACCCGGCCAGAAGTGTGAGGAAAATATCGACGATTGTCCAGGAAAC<br>AACTGCAAGAACGGGGGTGCTGTGTGGACGGCGTGAACACCT  |
| Notch3           | NM_0004<br>35.2    | 1966-<br>2065 | CTTTGGAGTCTGCCGTGATGGCATCAACCGCTACGACTGTGTCTGCCAACCTGGCTTC<br>ACAGGGCCCCTTTGTAACGTGGAGATCAATGAGTGTGCTTCC |
| NR3C1            | NM_0010<br>18077.1 | 1666-<br>1765 | GCTTTCTCTCTGGCGGGAGAAGACGATTCTTCTTTTGAAGGAAACTCGAATGA<br>GGACTGCAAGCCTCTCATTTTACCGGACACTAAACCCAAAATT     |
| NR4A1            | NM_0021<br>35.3    | 156-255       | CGGCCGGGTAGGGTGCAGCCTGAGGCTTGTTCAGCAGAACAGGTGCAAGCCACATT<br>GTTGCCAAGACCTGCCTGAAGCCGATTCTCCCACTGCCTCT    |
| C5ORF13          | NM_0011<br>42474.1 | 716-815       | GTGAATCCACGTTTACAACCTTACAGGTGGGCCTTCAGGCCTGGTTGCTACAACAA<br>TGCTTCCACAACCTCAAACCTCCACCGCGCTCACACAACCGG   |

|           |                    |               |                                                                                                          |
|-----------|--------------------|---------------|----------------------------------------------------------------------------------------------------------|
| NRIP1     | NM_0034<br>89.2    | 336-435       | TGACTCATGGAGAAGAGCTTGGCTCTGATGTGCACCAGGATTCTATTGTTTTAACTTA<br>CCTAGAAGGACTACTAATGCATCAGGCAGCAGGGGATCAGG  |
| Nrp1      | NM_0038<br>73.5    | 371-470       | GCCTCGCTGCTTTCTTTCTCCAAGACGGGCTGAGGATTGTACAGCTCTAGGCGGAGT<br>TGGGGCTCTTCGGATCGCTTAGATTCTCCTCTTTGCTGCATT  |
| NT5E      | NM_0025<br>26.2    | 1215-<br>1314 | ATTCGGGTTTTGAAATGGATAAACTCATCGCTCAGAAAGTGAGGGGTGTGGACGTC<br>GTGGTGGGAGGACACTCCAACACATTTCTTTACACAGGCAATCC |
| OAZ1      | NM_0041<br>52.2    | 314-413       | GGTGGGCGAGGGAATAGTCAGAGGGATCACAATCTTTAGCTAACTTATTCTACTCC<br>GATGATCGGCTGAATGTAACAGAGGAACTAACGTCCAACGACA  |
| OPTN      | NM_0010<br>08211.1 | 626-725       | TGAAGCTAAATAATCAAGCCATGAAAGGGAGATTTGAGGAGCTTTGAGGCTGGACA<br>GAGAAACAGAAGGAAGAACGCCAGTTTTTTGAGATACAGAGCAA |
| P2RX7     | NM_0025<br>62.4    | 341-440       | AGTTGGTGCACAGTGTCTTTGACACCGCAGACTACACCTTCCCTTTGCAGGGGAACTC<br>TTTCTTCGTGATGACAACTTTCTCAAACAGAAGGCCAAGA   |
| Pax5      | NM_0167<br>34.1    | 2289-<br>2388 | CTCCAAGAGGAGCACACTTTGGGGAGATGTCTGGTTTCTGCCTCCATTTCTCTGGG<br>ACCGATGCAGTATCAGCAGCTTTTTCCAGATCAAAGAACTC    |
| PDCD1     | NM_0050<br>18.1    | 176-275       | CTTCTTCCAGCCCTGCTCGTGGTGACCGAAGGGGACAACGCCACCTTCACCTGCAG<br>CTTCTCCAACACATCGGAGAGCTTCGTGCTAAACTGGTACCGC  |
| PDCD1LG2  | NM_0252<br>39.3    | 236-335       | TGTGGAGCTGTGGCAAGTCTCATATCAAATACAGAACATGATCTTCTCCTGCTAAT<br>GTTGAGCCTGGAATTGCAGCTTACCAGATAGCAGCTTTATT    |
| LOC282997 | NR_02693<br>2.1    | 666-765       | TGATCACATTCTACCTGGCATTATTTTCATCTGAGTCCCTGTCTAGCCCTTCTGCCATT<br>AGACTGTAACCTTGTTTAGGGAAAGACCTGTGTCTTACTC  |
| PDE3      | NM_0009<br>21.3    | 3011-<br>3110 | CTGGCCAACCTTCAGGAATCCTTCATCTCTCACATTGTGGGGCCTCTGTGCAACTCCT<br>ATGATTGAGCAGGACTAATGCCTGGAAAATGGGTGGAAGACA |
| PDE4      | NM_0011<br>11307.1 | 3856-<br>3955 | AATAATGGTGTATACCCTCATTCTCATTCTGGGCAGCCCTTCTTCCACCTGGCACC<br>AAAATAATTTCTCCTCCATCCGTACCTTGCTAGCCTCTCC     |
| PDE7      | NM_0026<br>04.2    | 2211-<br>2310 | GTAGCTCAACAAGGAATAGAGGGAGGAGTGAATTTGGTAGCTGGTGTGAATAG<br>GGCCTTTGAGAATCAGACTGAACACAGTGAATATGTGCCAAA      |
| PKD1      | NM_0026<br>10.3    | 1171-<br>1270 | TGGATTGCCATATCACGTCTTTACGCACAATACTTCCAAGGAGACCTGAAGCTGTAT<br>TCCCTAGAGGGTTACGGGACAGATGCAGTTATCTACATTAAG  |
| PNK       | NM_0036<br>81.3    | 581-680       | TCCCGGAGGACCTCCTTCCCGTCTACAAAGAAAAAGTGGTGCCGCTTCAGACATTA<br>TCACGCCCAACCAGTTTGAGGCCGAGTTACTGAGTGGCCGGAA  |
| PECAM1    | NM_0004<br>42.3    | 1366-<br>1465 | ATCTGCACTGCAGGTATTGACAAAGTGGTCAAGAAAAGCAACACAGTCCAGATAGTC<br>GTATGTGAAATGCTCTCCAGCCCAGGATTTCTTATGATGCC   |
| PHACTR2   | NM_0011<br>00165.1 | 1861-<br>1960 | AGAGAGTCGACAGTTTACAAGTTTTATCGTCCATAACGAAGAGTGAGACTATTTGG<br>AAACAGAGACTGATCATCTTTGGGGGAAGCCCTGCTTCTGAA   |
| PHC1      | NM_0044<br>26.2    | 2906-<br>3005 | ATACAGCTCCACCTACACCGGAATTACATGGCATCAACCCTGTGTTCTGTCCAGTAA<br>TCCAGCCGTTGGAGTGTAGAGGAGGTGTACGAGTTTATTGC   |
| Pias3     | NM_0060<br>99.3    | 836-935       | CGACTCTCAGCCACTGTTCCCAACACCATTGTGGTCAATTGGTCATCTGAGTTCGGAC<br>GGAATTACTCCTGTCTGTGTACCTGGTGAGGCAGTTGACTG  |
| pkm2      | NM_1824<br>71.1    | 2106-<br>2205 | ATGGCAAGAGGGTGACAGCTTCTTTCTGTGTGTACTCTGTCCAGTTCCTTAGAAA<br>AAATGGATGCCAGAGGACTCCAACCCTGGCTTGGGGTCAA      |
| POLR1B    | NM_0190<br>14.3    | 3321-<br>3420 | GGAGAACTCGGCCTTAGAATACTTTGGTGAGATGTTAAAGGCTGCTGGCTACAATTT<br>CTATGGCACCGAGAGGTTATATAGTGGCATCAGTGGGCTAGAA |
| POLR2A    | NM_0009<br>37.2    | 3776-<br>3875 | TTCCAAGAAGCCAAAGACTCCTTCGCTTACTGTCTTCTGTTGGGCCAGTCCGCTCGA<br>GATGCTGAGAGAGCCAAGGATATTCTGTGCCGTCTGGAGCAT  |
| POP5      | NM_0159<br>18.3    | 561-660       | GCTTCAGGCCCACTTGTTGAACAGAACAATCTGGGTAGCAACAGCATCTTCCACAGTT<br>TTCCAAACTGGATAGCTGCCAACCAGCAGACATTACCACTT  |
| Pou2af1   | NM_0062<br>35.2    | 1676-<br>1775 | CCCTGATGCCAGAGTCTTGAGCTGTCAGTTCACAGTTGCTCCTTTGTTGCTCTTC<br>TCAGCCTCGGCCAGATTTACAGTCCAGGCAGCAAATCTCA      |
| 4-Oct     | NM_0027<br>01.4    | 1226-<br>1325 | AAGTTCTTACTTAAGGAAGGAATTGGGAACACAAAGGGTGGGGCAGGGGA<br>GTTTGGGGCAACTGTTGGAGGGAAAGGTGAAGTTCAATGATGCTC      |
| PPARA     | NM_0010<br>01928.2 | 5221-<br>5320 | GGGTGTGTTTGCTATACGAACATAATGGACGTGAAGTGGGGCAGAAACCCAGA<br>CAGATTCAAGGATGCCAGGAGAGCTGTCCCTGTTTTAAAGAG      |

|         |                    |               |                                                                                                           |
|---------|--------------------|---------------|-----------------------------------------------------------------------------------------------------------|
| Pparg   | NM_0158<br>69.3    | 1036-<br>1135 | GAGCAAAGAGGTGGCCATCCGCATCTTTCAGGGCTGCCAGTTTCGCTCCGTGGAGGC<br>TGTGCAGGAGATCACAGAGTATGCCAAAAGCATTCTGTTTT    |
| PPP2R1A | NM_0142<br>25.3    | 1441-<br>1540 | AACTTAACTCCTTGTGCATGGCCTGGCTTGTGGATCATGTATATGCCATCCGCGAGGC<br>AGCCACCAGCAACCTGAAGAAGCTAGTGGAAAAGTTTGGGAA  |
| PRDM1   | NM_1829<br>07.1    | 311-410       | CATCCCTGCCAACCAGGAACCTTCTTGTGTGGTATTGTCGGGACTTTGCAGAAAGGCTT<br>CACTACCCTTATCCCGGAGAGCTGACAATGATGAATCTCACA |
| PRF1    | NM_0050<br>41.3    | 2121-<br>2220 | ACTGTTTTTCAGGGAGGTGGCTGGGTTTACACGCTAATCCCGATTACCCCTGTCCAAA<br>CTGCCTAAGCCCTCCGCCATTCTCAAGCCCTGCAGTCACAGC  |
| AMPK    | NM_0062<br>52.2    | 976-1075      | ATAGTGGTGACCCTCAAGACCAGCTTGCAGTGGCTTATCATCTTATCATTGACAATCG<br>GAGAATAATGAACCAAGCCAGTGAGTTCTACCTCGCCTCTAG  |
| PRKCA   | NM_0027<br>37.2    | 5561-<br>5660 | CCGGCAGTGCTTCCCTTCTTTCATCCACTGGCCTCGTGTGGTCCATGCAGGGCCACT<br>GTCTGCCCTTCTGATGCCACGTATTAGGCTTCTTACTCAG     |
| Prkcq   | NM_0062<br>57.2    | 1326-<br>1425 | GATGGACGATGATGTTGAGTGCACGATGGTAGAGAAGAGAGTTCTTTCCTTGGCCTG<br>GGAGCATCCGTTTCTGACGCACATGTTTTGTACATTCCAGACC  |
| Prmt5   | NM_0061<br>09.3    | 1696-<br>1795 | TTGCACCTTGAATTTCTGTGGAGGTGAACACAGTACTACATGGCTTTCGCCGGCTAC<br>TTGAGACTGTGCTTATCAGGACATCACTCTGAGTATCCGT     |
| PROM1   | NM_0060<br>17.1    | 926-1025      | AGCCTGCGGTCATCTCTCAATGACCCTCTGTGCTTGGTGCATCCATCAAGTGAAACCT<br>GCAACAGCATCAGATTGTCTCTAAGCCAGCTGAATAGCAACC  |
| prss12  | NM_0036<br>19.3    | 2161-<br>2260 | AAGAAATTGGAGTTCAACAGATTGTGATTATCGGGAGTATCGACCCGACCGCAGTG<br>ATTATGACATAGCCCTGGTTAGATTACAAGGACCAGAAGAGCA   |
| PTGER2  | NM_0009<br>56.2    | 1411-<br>1510 | GTCAGAAGGAGCTACAAAACCTACCCTCAGTGAGCATGGTACTTGGCCTTGGAGGA<br>ACAATCGGCTGCATTGAAGATCCAGCTGCCTATTGATTTAAGC   |
| PTK2    | NM_0056<br>07.3    | 1006-<br>1105 | GGTTCAAGCTGGATTATTTTCAGTGGAACTGGCAATCGGCCAGAAGAAGGAATCAG<br>TTACCTAACGGACAAGGGCTGCAATCCCACACATCTTGCTGACT  |
| SHP2    | NM_0028<br>34.3    | 4651-<br>4750 | TAGTCCCTAGGTTGCTACGGCTTATCATGTGCTTGGTAAAAGGTGATCGCAGGTTCTC<br>AGACGAGTTTACTTTACATGAGATGGAATCAGGCAGAGAGGC  |
| Ptpn4   | NM_0028<br>30.2    | 706-805       | TCGAGGCTTTTTTCTCCAGCCGAGAGGACGCGGCTGTGATATACGAAGACTTTGTG<br>TGGACAGTAATGACCTCACGTTTCCGATTGCCTGCTGGCAGAA   |
| SHP-1   | NM_0028<br>31.5    | 1735-<br>1834 | TGGTGCAGACGGAGGCGCAGTACAAGTTCATCTACGTGGCCATCGCCAGTTCATTG<br>AAACCACTAAGAAGAAGCTGGAGGTCCTGCAGTCGCAGAAGGG   |
| PTPRK   | NM_0011<br>35648.1 | 4316-<br>4415 | GTGATCAACCGGATTTTTAGGATATGCAATCTAACAGACCACAGGAAGGTTATCTG<br>ATGGTGCAACAGTTTCAGTACCTAGGATGGGCTTCTCATCGAG   |
| Rab31   | NM_0068<br>68.3    | 3801-<br>3900 | TTTTGTAAAGAGCTTCCATCTGGGCTGGACCCAGTTCTTGCACATACAAGACACCGCT<br>GCAGTCAGCTAGGACCTTCCGCCATGTATTCTATTCTGTAG   |
| RAC1    | NM_1988<br>29.1    | 1251-<br>1350 | AAAGACCTTCGTCTTTGAGAAGACGGTAGCTTCTGCAGTTAGGAGGTGCAGACACTT<br>GCTCTCCTATGTAGTTCTCAGATGCGTAAAGCAGAACAGCCTC  |
| RAC2    | NM_0028<br>72.3    | 1070-<br>1169 | GCTGCCACAACCTGTGTACCTCAGGGATGGGGCTTACTCCCTCCTGAGGCCAGCT<br>GCTCTAATATCGATGGTCTGCTTGCCAGAGAGTTCCTCTAC      |
| Raf-1   | NM_0028<br>80.2    | 1991-<br>2090 | CCTATGGCATCGTATTGTATGAACTGATGACGGGGGAGCTTCTTATTCTCACATCAA<br>CAACCGAGATCAGATCATCTTCATGGTGGGCCGAGGATATGC   |
| GARNL4  | NM_0150<br>85.4    | 4141-<br>4240 | CCCACGGCTGGAAAGAGGCCTGTACGTTCTGGACGCGTTTTGTTGGCTGGGCTTCTG<br>GAGGCACTGGCAAGGTCAAACCTGCATTTCTTAAAGAACAGTTG |
| RARA    | NM_0009<br>64.2    | 116-215       | AGCCACCTAGCTGGGGCCCATCTAGGAGTGGCATCTTTTTTGGTGCCTGAAGGCCA<br>GCTCTGGACCTTCCAGGAAAAGTGCCAGCTCACAGAACTGCT    |
| Rbpms   | NM_0010<br>08710.1 | 843-942       | AAACAGCCTGTAGTTTTTGTAGTTTTGACAGTCGCTCAGAAGCAGAGGCTGCAAAG<br>AATGCTTTGAATGGCATCCGCTTCGATCCTGAAATTCCGCAA    |
| Relb    | NM_0065<br>09.2    | 251-350       | CACTCTCGCTCGCCGTTTCCAGGAGCACAGATGAATTGGAGATCATCGACGAGTACA<br>TCAAGGAGAACGGCTTCGGCCTGGACGGGGGACAGCCGGGCC   |
| RHOA    | NM_0016<br>64.2    | 1231-<br>1330 | GGTACTCTGGTGAAGTACCACCTTCAGGGCTTACTCCGTAACAGATTTTGTGGCATA<br>GCTCTGGGGTGGGCAGTTTTTGAATGGGCTCAACCAGAA      |
| RNF125  | NM_0178<br>31.3    | 791-890       | GCAAGGTGTGTATGTCCCTTTTGTGAGAGGGAAGTGTATGAAGACAGCTTGCTGGAT<br>CATTGTATTACTCATCACAGATCGGAACGGAGGCCTGTGTTCT  |

|          |                    |               |                                                                                                          |
|----------|--------------------|---------------|----------------------------------------------------------------------------------------------------------|
| RORA     | NM_1342<br>61.2    | 1716-<br>1815 | AAAATTAACCGAGACACTTTATATGGCCCTGCACAGACCTGGAGCGCCACACACTGC<br>ACATCTTTTGGTGATCGGGGTCAGGCAAAGGAGGGGAAACAAT |
| RORC     | NM_0010<br>01523.1 | 1351-<br>1450 | CTCATCAATGCCATCGGCCAGGGCTCCAAGAGAAAAGGAAAAGTAGAACAGCTGCA<br>GTACAATCTGGAGCTGGCCTTTCATCATCATCTCTGCAAGACTC |
| RPL27    | NM_0009<br>88.3    | 24-123        | GGGCCGGGTGGTTGCTGCCGAAATGGGCAAGTTCATGAAACCTGGGAAGGTGGTGC<br>TTGTCCTGGCTGGACGCTACTCCGGACGCAAAGCTGTCATCGTG |
| Rps13    | NM_0010<br>17.2    | 332-431       | GCATCTTGAGAGGAACAGAAAGGATAAGGATGCTAAATCCGTCTGATTCTAATAGA<br>GAGCCGATTACCGTTTGGCTCGATATTATAAGACCAAGCGA    |
| RRM2     | NM_0010<br>34.1    | 1616-<br>1715 | AGGGGTGACCCCTTAGTGAGCTTAGCACAGCGGGATTAAACAGTCCTTTAACCAGCA<br>CAGCCAGTTAAAAGATGCAGCCTCACTGCTTCAACGCAGATTT |
| RUNX1    | NM_0017<br>54.4    | 636-735       | CAGCCATGAAGAACCAGGTTGCAAGATTTAATGACCTCAGGTTTGTGCGTCGAAGTG<br>GAAGAGGGAAAAGCTTCACTCTGACCATCACTGTCTTACAAA  |
| RUNX2    | NM_0043<br>48.3    | 1851-<br>1950 | GAAGCCACAGCAGTTCCTCAACTGTTTTGAATTCTAGTGGCAGAATGGATGAATCTG<br>TTTGGCGACCATATTGAAATTCCTCAGCAGTGGCCAGTGTA   |
| RUNX3    | NM_0043<br>50.1    | 2086-<br>2185 | GTGGTCTCATAATTCATTTGTGGAGAGAACAGGAGGGCCAGATAGATAGGTCCTA<br>GCAGAAGGCATTGAGGTGAGGGATCATTTTGGGTCAGACATCAA  |
| S100A4   | NM_0029<br>61.2    | 264-363       | CAGGGACAACGAGGTGGACTTCCAAGAGTACTGTGTCTTCTGTCTGCATCGCCAT<br>GATGTGTAACGAATCTTTGAAGGCTTCCAGATAAGCAGCCC     |
| S100A6   | NM_0146<br>24.3    | 407-506       | GAAGGAGCTGAAGGAGCTGATCCAGAAGGAGCTCACCATTGGCTCGAAGCTGCAGG<br>ATGCTGAAATTGCAAGGCTGATGGAAGACTTGACCCGGAACAAG |
| s1pr1    | NM_0014<br>00.3    | 1066-<br>1165 | CCTGACGTTCCGCAAGAACATTTCCAAGGCCAGCCGAGCTCTGAGAAGTCGCTGGC<br>GCTGCTCAAGACCGTAATTATCGTCTGAGCGTCTTCATCGCC   |
| s1pr4    | NM_0037<br>75.2    | 496-595       | CAAGACCAGCCGCTTACGGCTTCATCGGCCTGCTGGCTGCTGGCCGCGCTGCT<br>GGGGATGCTGCCTTTGCTGGGCTGGAAGTGCCTGTGCGCCTTT     |
| s1pr5    | NM_0307<br>60.3    | 1416-<br>1515 | TGCCCTCGTGAATTGACGTTCTGCTTGGGAACACAGAAAAGAAGTCCGGTGATGAAA<br>TAATGGAGATGATTCCAGTGACAAACGACAGAGATGGTGATGG |
| SATB1    | NM_0011<br>31010.1 | 1336-<br>1435 | TTCCGAAATCTACCAGTGGGTACGCGATGAACTGAAACGAGCAGGAATCTCCCAGGC<br>GGTATTTGCACGTGTGGCTTTAACAGAACTCAGGGCTTGCTT  |
| Scmh1    | NM_0122<br>36.2    | 881-980       | AACCCTCATTTCAATTTGCCAGCCACTATTGGGGAGGTTCCGGGCTCAGAGGTGCTT<br>GTCATTTTGATGGGTGGCGAGGGGCTTTGACTACTGGTGCC   |
| SCML1    | NM_0010<br>37540.1 | 926-1025      | GCAACGTATGGTTCTTCTCAGGGCTCTGCCTTGGCAACCTCGGGCTGACAGCATCC<br>ACAACACTTACTCAACTGACCATGCTTCTGCAGCACACCTT    |
| SCML2    | NM_0060<br>89.2    | 361-460       | ATTGGAAGCCCGTGACCCTCGCAATGCCACTTCAGTATGTATTGCTACGGTTATTGGA<br>ATTACTGGGGCCAGGTTACGGTTACGACTGGATGGTAGTGAC |
| SEL1L    | NM_0050<br>65.4    | 981-1080      | GGGCAATCTAATAGCCACATGGTTTTGGGTTACAGATACTGGGCTGGCATCGGCGT<br>CCTCCAGAGTTGTGAATCTGCCCTGACTCACTATCGTCTTGTT  |
| SELL     | NM_0006<br>55.3    | 111-210       | CTCCCTTTGGGCAAGGACCTGAGACCTTGTGCTAAGTCAAGAGGCTCAATGGGCTG<br>CAGAAGAACTAGAGAAGGACCAAGCAAAGCCATGATATTTCCA  |
| CLA      | NM_0030<br>06.3    | 2298-<br>2397 | CATGGGCTGTTAGGTTGACTTCAGTTTTGCCTCTTGGACAACAGGGGGTCTTGACAT<br>CCTTGGGTGACCAGGAAAAGTTCAGGCTATGGGGGGCCAAAG  |
| SERPINE2 | NM_0062<br>16.2    | 241-340       | CGCTGCCTTCCATCTGCTCCCACTTCAATCCTCTGTCTCTCGAGGAACTAGGCTCCAAC<br>ACGGGGATCCAGGTTTTCAATCAGATTGTGAAGTCGAGGCC |
| LNK      | NM_0054<br>75.2    | 4286-<br>4385 | CCTCCAGCCAGAAGTTAAACATCTGGGATATGACGTCTTCATGCCAGGGGCACTCAT<br>TTCTTAGCAGCCTCTACATACTCTCAGGTGGTGCCAAG      |
| Sh2d2a   | NM_0011<br>61443.1 | 342-441       | TGCTGGAGCCCAAGCCTCAGGGGTGCTACTTGGTGCAGGTTACAGGAGAGCGCGGTG<br>ACCTTCGTGCTGACTTACAGGAGCCGACTTGCTGCCGCCACTT |
| SIRT3    | NM_0122<br>39.5    | 1546-<br>1645 | GAATCAGACCAACTGGAATCCCAGACCGAGTCTGCTTTCTGTGCCTAGTTGAACGGC<br>AAGCTCGGCATCTGTTGGTTACAAGATCCAGACTTGGGCCGAG |
| SIT1     | NM_0144<br>50.2    | 721-820       | GCCCCAGCCCCCGTAGCAGGGGCATGACTGTTTCCAACCAGCACCCAAAGACGGG<br>CGCCATTGCAAGTACAGGATGTGATCTACCCCGACTTCTT      |
| Skap1    | NM_0037<br>26.3    | 1361-<br>1460 | AAGTGGGAAGAGGCAGTTCATCAAACCTGTTACTAAACCAGCCTAGTCATAGCTCA<br>TCCCATCTCTAAATGTGTCCACACAACCACATCTGCCTTTTC   |

|        |                    |               |                                                                                                           |
|--------|--------------------|---------------|-----------------------------------------------------------------------------------------------------------|
| SCAP2  | NM_0039<br>30.3    | 3375-<br>3474 | TTTTACAGTTAATCCAGGAGAGGGAGTCCTTTGCCAACTGATGACCAACAGTTCCAA<br>GCCAGATAGTCTCGTGAACAGTGACAATACAGAAATAAGGTGT  |
| SLA2   | NM_0322<br>14.2    | 1641-<br>1740 | AAAGGAAAGCTGAGATGATGTCTTACCGTAGCAGCAGATCTTGATGGTCCAGGCTC<br>TATGTGACCTCCAGAGCAAAGAGAAAGACTTCGGACAGTCTAG   |
| SLAMF1 | NM_0030<br>37.2    | 581-680       | GTGTCTCTTGATCCATCCGAAGCAGGCCCTCCACGTTATCTAGGAGATCGCTACAAGT<br>TTTATCTGGAGAATCTCACCTGGGGATACGGGAAAGCAGGA   |
| SLAMF7 | NM_0211<br>81.3    | 216-315       | GGGCACTATCATAGTGACCCAAAATCGTAATAGGGAGAGAGTAGACTTCCCAGATG<br>GAGGCTACTCCCTGAAGCTCAGCAAACCTGAAGAAGAATGACTCA |
| SLC2A1 | NM_0065<br>16.2    | 2501-<br>2600 | AGGCTCCATTAGGATTTGCCCTTCCCATCTCTTCTACCCAACCACTCAAATTAATCT<br>TTCTTTACCTGAGACCAGTTGGGAGCACTGGAGTGCAGGGA    |
| slfn5  | NM_1449<br>75.3    | 511-610       | GAAGCTCTGGCATTCTCAAATGCAGGACTCAGACTCCAACGAATATTAATGTTTCCA<br>ATTCATTAGGTCCACAGGCAGCTCAGGGTAGTGTACAATATG   |
| SMAD3  | NM_0059<br>02.3    | 4221-<br>4320 | TTAAAGGACAGTTGAAAAGGGCAAGAGGAAACCAGGGCAGTTCTAGAGGAGTGCT<br>GGTACTGGATAGCAGTTTTAAGTGGCGTTCACCTAGTCAACACG   |
| SMAD4  | NM_0053<br>59.3    | 1371-<br>1470 | AGGTTGCACATAGGCAAAGGTGTGCAGTTGGAATGTAAAGGTGAAGGTGATGTTTG<br>GGTCAGGTGCCTTAGTGACCACGCGGTCTTTGTACAGAGTTACT  |
| Smad7  | NM_0059<br>04.2    | 1836-<br>1935 | AGCAGAAATCCAAGCACCAACACAGTGTATGAAGGGGGGCGGTATCATTTTC<br>ACTTGTGAGGAGTGTGTGTGAGTGTGAGTGTGCGGCTGTGTGTG      |
| Smyd1  | NM_1982<br>74.3    | 654-753       | TGCAGGCCGTGGGCGTAGGCATCTTCCCAACCTGGGCCTGGTGAACCATGACTGTT<br>GGCCCAACTGTACTGTCATATTTAACAATGGCAATCATGAGGC   |
| Smyd3  | NM_0227<br>43.1    | 966-1065      | TCAACCTCGGCCTGTTGGAGGAAGCCTTGTCTATGGTACTCGACCATGGAGCCAT<br>ACAGGATTTTTTCCAGGAAGCCATCCCGTCAGAGGGGTTCA      |
| SNAI1  | NM_0059<br>85.2    | 64-163        | GACCACTATGCCGCGCTCTTCTCGTCAGGAAGCCCTCCGACCCCAATCGGAAGCCT<br>AACTACAGCGAGCTGCAGGACTCTAATCCAGAGTTTACCTTC    |
| SOCS1  | NM_0037<br>45.1    | 1026-<br>1125 | TTAACTGTATCTGGAGCCAGGACCTGAACTCGCACCTCTACCTTTCATGTTTACATA<br>TACCCAGTATCTTTCACAAACCAGGGTTGGGGGAGGGTC      |
| SOCS3  | NM_0039<br>55.3    | 1871-<br>1970 | GGAGGATGGAGGAGACGGGACATCTTTCACCTCAGGCTCCTGGTAGAGAAGACAGG<br>GGATTCTACTCTGTGCCTCCTGACTATGTCTGGCTAAGAGATTC  |
| SOD1   | NM_0004<br>54.4    | 36-135        | GCCTATAAAGTAGTCGCGGAGACGGGGTGCTGGTTTGCCTGCTAGTCTCCTGCAGCG<br>TCTGGGGTTTCCGTTGCAGTCTCGGAACCAGGACCTCGGCGT   |
| SOX13  | NM_0056<br>86.2    | 3040-<br>3139 | ATTTATTGAGTGCCCACTACGTGCCAGGCACTGTTGCTGAGTTCCTGTGGGTGTGTCT<br>CTCGATGCCACTCCTGCTTCTCTGGGGCCTCTTCTGTGCT    |
| Sox2   | NM_0031<br>06.2    | 152-251       | CTTAAGCCTTTCCAAAAATAATAACAATCATCGGCGGCGGCAGGATCGGCCAG<br>AGGAGGAGGGAAGCGCTTTTTTGTATCTGATTCCAGTTTGCC       |
| SOX4   | NM_0031<br>07.2    | 3041-<br>3140 | GTTACGGTCAAACCTGAAATGGATTTGCACGTTGGGGAGCTGGCAGGCGGCGGCTGC<br>TGGGCTCCGCCTTCTTCTACGTGAAATCAGTGAGGTGAGAC    |
| Sox5   | NM_1529<br>89.2    | 1886-<br>1985 | TAGCCATGCAATGATGGATTTCAATCTGAGTGGAGATTCTGATGGAAGTGCTGGAGT<br>CTCAGAGTCAAGAATTTATAGGGAATCCCGAGGGCGTGGTAGC  |
| SPI1   | NM_0031<br>20.1    | 731-830       | CTCCGCAGCGGCGACATGAAGGACAGCATCTGGTGGTGGACAAGGACAAGGGCA<br>CCTCCAGTTCTCGTCCAAGCACAAGGAGGCGTGGCGCACCGCT     |
| CD43   | NM_0010<br>30288.1 | 2799-<br>2898 | AAGCCAGGCTTCATGGAAAGATCGTATGTGTGACCCAAATATGAGTTCTTCAGCTCA<br>GCCATGGTAATCCCTTCTTGAAGTCTCCATTTCTGCAGTACA   |
| Spry2  | NM_0058<br>42.2    | 86-185        | AAAGAGGAAATACTCCGCGTGCCTTGTAGAAGGGGAGTCGTCTCCAGCTCCGAAC<br>CCCGGAGTGTTATCAGCGGGGAATCTGGCTCCGAATTCTCTTT    |
| STAT1  | NM_0073<br>15.2    | 206-305       | TTTGCTGTATGCCATCCTCGAGAGCTGTCTAGGTTAACGTTCCGACTCTGTGTATATA<br>ACCTCGACAGTCTTGGCACCTAACGTGCTGTGCGTAGCTGCT  |
| Stat2  | NM_0054<br>19.2    | 1966-<br>2065 | CCGTACACGAAGGAGGTGCTGCAGTCACTCCCGCTGACTGAAATCATCCGCCATTAC<br>CAGTTGCTCACTGAGGAGAATATACCTGAAAACCACTGCGCT   |
| STAT3  | NM_1392<br>76.2    | 4536-<br>4635 | AGACTTGGGCTTACCATTGGGTTTAAATCATAGGGACCTAGGGCGAGGGTTCAGGG<br>CTTCTCTGGAGCAGATATTGTCAAGTTCATGGCCTTAGGTAGCA  |
| STAT4  | NM_0031<br>51.2    | 790-889       | AGACAATGGATCAGAGTGACAAGAATAGTGCCATGGTGAATCAGGAAGTTTTGACA<br>CTGCAGGAAATGCTTAACAGCCTCGATTTCAAGAGAAAGGAGGC  |



|        |                    |                 |                                                                                                            |
|--------|--------------------|-----------------|------------------------------------------------------------------------------------------------------------|
| STAT5A | NM_0031<br>52.2    | 3461-<br>3560   | GAGACAGAGAGAGAGAAAAGAGAGAGTGTGTGGGTCTATGTAATGCATCTGTCCTC<br>ATGTGTTGATGTAACCGATTCTCTCTCAGAAGGGAGGCTGGGG    |
| STAT5B | NM_0124<br>48.3    | 201-300         | AAGGAGAAGCCCTTCATCAGATGCAAGCGTTATATGGCCAGCATTTTCCCATTGAGG<br>TGCGGCATTATTTATCCCAGTGGATTGAAAGCCAAGCATGGGA   |
| Stat6  | NM_0031<br>53.3    | 2031-<br>2130   | AGAACATCCAGCCATTCTCTGCCAAAGACCTGTCCATTGCTCACTGGGGGACCGAA<br>TCCGGGATCTTGCTCAGCTCAAAAATCTCTATCCCAAGAAGCC    |
| STMN1  | NM_2034<br>01.1    | 288-387         | CGTGGGTGCGGCCAGGACTTTCCTTATCCCAGTTGATTGTGCAGAATACACTGCCTG<br>TCGCTTGCTTCTATTACCATGGCTTCTTGATATCCAGGT       |
| Syk    | NM_0031<br>77.3    | 1686-<br>1785   | CGGACTCTCAAAGCACTGCGTGCTGATGAAACTACTACAAGGCCAGACCCATGG<br>AAAGTGGCCTGTCAAGTGGTACGCTCCGGAATGCATCAACTAC      |
| SYNE2  | NM_1829<br>14.2    | 20436-<br>20535 | CTGGTAGAACGTCAACCTCAAGTGGACATGTTACAGGAGATTTCAAACAGCCTTCTC<br>ATTAAGGGACATGGAGAAGACTGTATTGAAGCTGAAGAAAAGG   |
| Taf2   | NM_0031<br>84.3    | 3151-<br>3250   | ACTTCACATGACTGGAGTTACGGTGTGGTGTGGACTGTACTTCACACTTTTTG<br>GCCTCAGTAGACCTTCTGTTTACCCTTGCCAGAGCTTGGGT         |
| Taf9   | NM_0010<br>15891.1 | 316-415         | CACCCTCCAACCTTTCGCGACGGAATGTGTCATCGAAAGCCAGGTACACCAGGGGTTG<br>GAAAAACCACACTAGGCAAAGAAGTTCGCTCAAAAATCAGGACT |
| TAL1   | NM_0031<br>89.2    | 4636-<br>4735   | ACAGCATCTGTAGTCAGCCGACAACTATTTTCGGCCTTTTGGGGGTGGGTCTGGCCGT<br>ACTTGTGATTTTCGATGGTACGTGACCCTCTGCTGAAGACTTGC |
| TBP    | NM_0031<br>94.3    | 26-125          | CGCCGGCTGTTAACTTCGCTTCCGCTGGCCCATAGTGATCTTTCAGTGACCCAGCA<br>GCATCACTGTTTCTTGGCGTGTGAAGATAACCCAAGGAATTG     |
| TBX21  | NM_0133<br>51.1    | 891-990         | ACACAGGAGCGCACTGGATGCGCCAGGAAGTTTCATTTGGGAACTAAAGCTCACA<br>AACAACAAGGGGGCGTCCAACAATGTGACCCAGATGATTGTGCT    |
| Tbx6   | NM_0046<br>08.3    | 807-906         | GACAGCTACCAGAACCCACAGATCACACAAGTGAAGATTGCAGCCAATCCCTTTGC<br>CAAAGGCTTCCGGGAGAACGGCAGAACTGTAAGAGGGAGCGA     |
| TBXA2R | NM_0010<br>60.3    | 386-485         | CACACGCGCTCCTCCTTCTCACCTTCTCTGCGCCTCGTCTCACCGACTTCTGGG<br>GCTGCTGGTGACCGGTACCATCGTGGTGTCCAGCACGCGG         |
| Tcf12  | NM_2070<br>37.1    | 1106-<br>1205   | CACATGACCGCTTGAGTTATCCTCCACACTCAGTTTACCAACAGACATAAACACGAG<br>TCTTCCACCAATGTCCAGCTTTCATCGCGGCAGTACCAGCAG    |
| tcf19  | NM_0071<br>09.2    | 2081-<br>2180   | CATGGACACCAGAATATCTGTAGTCAGAGCACCTATCAGTTGCAAAGCCATGCCTG<br>CAACCGATGGAAAATGTAAGAGGGAGTTCTTAAGTTCTTGGT     |
| Tcf20  | NM_0056<br>50.1    | 926-1025        | CAATGTGAATGCTGGATCTCAGTATGAAGGACACAATGTGGGTTCTAATGCACAGGC<br>TTATGGAACACAATCCAATTACAGCTATCAGCCTCAATCTATG   |
| E2A    | NM_0032<br>00.3    | 859-958         | ACGTTTGGTGGCCTGCACCAGCACGAGCGTATGGGCTACCAGCTGCATGGAGCAGA<br>GGTGAACGGTGGGCTCCCATCTGCATCCTCCTTCTCCTCAGCCC   |
| Tcf4   | NM_0031<br>99.1    | 1456-<br>1555   | TGGAATCATTGGACCTTCTCATAATGGAGCCATGGGTGGTCTGGGCTCAGGGTATGG<br>AACCGCCTTCTTTCAGCCAACAGACATTCACTCATGGTGGGG    |
| Tcf7   | NM_0032<br>02.2    | 2421-<br>2520   | ATTCCATTTCCAGTTCATCTATGGCAGTCCAGCCAGCTCCTGGGCAGCTTGAGAGGGC<br>AAACCCAAAACCTCATGACAGCCAGAGCCTGTCTTTCAGCAT   |
| TDGF1  | NM_0032<br>12.2    | 1568-<br>1667   | AAGGAAAAGAAAACATCTTTAAGGGGAGGAACCAGAGTGTGAAGGAATGGAAGTC<br>CATCTGCGTGTGTGCAGGGAGACTGGGTAGGAAAGAGGAAGCAAA   |
| TDO2   | NM_0056<br>51.2    | 496-595         | AGAGTACTTATCTCCAGCATCAGGCTTCCAGAGTTTGCAATTCCGACTATTAGAAAAC<br>AAGATAGGTGTTCTTTCAGAACATGAGAGTCCCTTATAACAGA  |
| TEK    | NM_0004<br>59.2    | 616-715         | CGAGTTCGAGGAGAGGCAATCAGGATACGAACCATGAAGATGCGTCAACAAGCTTC<br>CTTCTACCAGCTACTTTAACTATGACTGTGGACAAGGGAGATA    |
| Trf    | NM_0032<br>18.3    | 1038-<br>1137   | CTGAAAGCAGAATACCTGTTTCAAAGAGTCAGCCGGTAACTCCTGAAAAACATCGAG<br>CTAGAAAAAGACAGGCATGGCTTTGGGAAGAAGACAAGAATTT   |
| TERT   | NM_1982<br>53.1    | 2571-<br>2670   | GGCTTCAAGGCTGGGAGGAACATGCGTCGCAAACCTTTGGGGTCTTGCGGCTGAA<br>GTGTACAGCCTGTTTCTGGATTTGCAGGTGAACAGCCTCCAGA     |
| TF     | NM_0010<br>63.2    | 641-740         | CTGCTCCACCCTTAACCAATACTTCGGTACTCGGGAGCCTTCAAGTGTCTGAAGGAT<br>GGTGTGGGGATGTGGCCTTTGTCAAGCACTCGACTATATTT     |
| Tcfe3  | NM_0065<br>21.3    | 2936-<br>3035   | GGTATTAGTGGGGGACTGAGTTCAGGTTACCAGAACCAGTACCTCAGTATTCTTTTTC<br>AACATGTAGGGCAAGAGGATGAAGGAAGGGGCTATCCTGGGA   |

|                      |                 |               |                                                                                                           |
|----------------------|-----------------|---------------|-----------------------------------------------------------------------------------------------------------|
| TFRC                 | NM_0032<br>34.1 | 1221-<br>1320 | CAGTTTCCACCATCTCGGTCATCAGGATTGCCTAATATACCTGTCCAGACAATCTCCA<br>GAGCTGCTGCAGAAAAGCTGTTTGGGAATATGGAAGGAGACT  |
| TGFA                 | NM_0032<br>36.2 | 781-880       | TGCCACAGACCTTCTACTTGGCCTGTAATCACCTGTGCAGCCTTTTGTGGGCCTTCA<br>AAACTCTGTCAAGAACTCCGTCTGCTTGGGGTTATTCAAGTGT  |
| TGFB1                | NM_0006<br>60.3 | 1261-<br>1360 | TATATGTTCTTCAACACATCAGAGCTCCGAGAAGCGGTACCTGAACCCGTGTTGCTCT<br>CCCGGGCAGAGCTGCGTCTGCTGAGGCTCAAGTTAAAAGTGG  |
| TGFB2                | NM_0032<br>38.2 | 1126-<br>1225 | AAGCCAGAGTGCCTGAACAACGGATTGAGCTATATCAGATTCTCAAGTCCAAAGATT<br>TAACATCTCCAACCCAGCGCTACATCGACAGCAAAGTTGTGAA  |
| TGFBR1               | NM_0046<br>12.2 | 4281-<br>4380 | GGGAAAATACGACTTAGTGAGGCATAGACATCCCTGGTCCATCCTTTCTGTCTCCAGC<br>TGTTTCTTGGAACCTGCTCTCCTGCTTGCTGGTCCCTGACGC  |
| Thymidine_<br>kinase | SCFV007.1       | 101-200       | TCTACGTACCCGAGCCGATGACTTACTGGCAGGTGCTGGGGGCTCCGAGACAATCG<br>CGAACATCTACACCACACAACACCGCTCGACCAGGGTGAGAT    |
| TIE1                 | NM_0054<br>24.2 | 2611-<br>2710 | CATCGGGGAGGGAACTTCGGCCAGTTCATCCGGGCCATGATCAAGAAGGACGGG<br>CTGAAGATGAACGCAGCCATCAAATGCTGAAAGAGTATGCCTCT    |
| TLR2                 | NM_0032<br>64.3 | 181-280       | CTGCTTCAACTGGTAGTTGTGGGTTGAAGCACTGGACAATGCCACATACTTTGTGG<br>ATGGTGTGGGTCTTGGGGTGCATCATCAGCCTCTCCAAGGAAG   |
| TLR8                 | NM_1386<br>36.3 | 2796-<br>2895 | GACAAAAACGTTCTCCTTGTCTAGAGGAGAGGGATTGGGATCCGGGATTGGCCATC<br>ATCGACAACCTCATGCAGAGCATCAACCAAAGCAAGAAAACAG   |
| TNF                  | NM_0005<br>94.2 | 1011-<br>1110 | AGCAACAAGACCACCACTTCGAAACCTGGGATTGAGGAATGTGTGGCCTGCACAGTG<br>AAGTGCTGGCAACCACTAAGAATCAAACCTGGGGCCTCCAGAA  |
| HVEM                 | NM_0038<br>20.2 | 917-1016      | CTCAGGGAGCCTCGTCATCGTCATTGTTTGTCCACAGTTGGCCTAATCATATGTGTG<br>AAAAGAAGAAAGCCAAGGGGTGATGTAGTCAAGGTGATCGTC   |
| TNFRSF18             | NM_0041<br>95.2 | 446-545       | AGGGGAAATTCAGTTTTGGCTTCCAGTGTATCGACTGTGCCTCGGGGACCTTCTCCG<br>GGGGCCACGAAGGCCACTGCAAACCTTGGACAGACTGCACCCA  |
| TNFRSF1B             | NM_0010<br>66.2 | 836-935       | CCCAGCTGAAGGGAGCACTGGCGACTTCGCTCTTCCAGTTGGACTGATTGTGGGTGT<br>GACAGCCTTGGGTCTACTAATAATAGGAGTGGTGAAGTGTGTC  |
| TNFRSF4              | NM_0033<br>27.2 | 201-300       | CCGTGCGGGCCGGGCTTCTACAACGACGTGGTCAGCTCCAAGCCGTGCAAGCCCTGC<br>ACGTGGTGTAACCTCAGAAGTGGGAGTGAGCGGAAGCAGCTGT  |
| TNFRSF9              | NM_0015<br>61.4 | 256-355       | AGATTTGCAGTCCCTGTCTCCAATAGTTTCTCCAGCGCAGGTGGACAAAGGACCT<br>GTGACATATGCAGGCAGTGTAAGGTGTTTTCAGGACCAGGAA     |
| TNFSF10              | NM_0038<br>10.2 | 116-215       | GGGGGACCCAGCCTGGGACAGACCTGCGTGCTGATCGTGATCTTCACAGTGCTCCT<br>GCAGTCTCTGTGTGGCTGTAACCTTACGTGTACTTTACCAAC    |
| CD254                | NM_0037<br>01.2 | 491-590       | TACCTGATTCATGTAGGAGAATTAACAGGCCTTTCAAGGAGCTGTGCAAAAGGAAT<br>TACAACATATCGTTGGATCACAGCACATCAGAGCAGAGAAAGC   |
| TNFSF14              | NM_0038<br>07.2 | 271-370       | ATTTTCAGAAGCCTCTGGAAAGTCGTGCACAGCCCAGGAGTGTGAGCAATTTCCGGT<br>TTCCTCTGAGGTTGAAGGACCCAGGCGTGTGAGCCCTGCTCCA  |
| CD252<br>(Ox40L)     | NM_0033<br>26.2 | 546-645       | GAAGGTCAGGTCTGTCAACTCCTTGATGGTGGCCTCTGACTTACAAAGACAAAGT<br>CTACTTGAATGTGACCACTGACAATACCTCCCTGGATGACTTC    |
| TOX                  | NM_0147<br>29.2 | 575-674       | CACAGTCTCCAATATGCTGGGCCAGGATGGAACACTGCTTTCTAATTCCATTTCTGTG<br>ATGCCAGATATACGAAACCCAGAAGGAAGTCAAGTACAGTTCC |
| TP53                 | NM_0005<br>46.2 | 1331-<br>1430 | GGGGAGCAGGGCTCACTCCAGCCACCTGAAGTCCAAAAGGGTCAAGTCTACCTCCC<br>GCCATAAAAAACTCATGTTCAAGACAGAAGGGCCTGACTCAGAC  |
| TRAF1                | NM_0056<br>58.3 | 3736-<br>3835 | CGAGTGATGGGTCTAGGCCCTGAAACTGATGTCTAGCAATAACCTCTTGATCCCTAC<br>TCACCGAGTGTTGAGCCCAAGGGGGGATTTGTAGAACAAGCC   |
| TRAF2                | NM_0211<br>38.3 | 1326-<br>1425 | GTGGCCCTTCAACCAGAAGGTGACCTAATGCTGCTCGACCAGAATAACCGGGAGCA<br>CGTGATTGACGCCTTCAAGCCCGACGTGACTTCATCCTCTTTT   |
| TRAF3                | NM_1457<br>25.1 | 1796-<br>1895 | ATATGATGCCCTGCTTCTTGGCCGTTAAGCAGAAAGTGACACTCATGCTGATGGAT<br>CAGGGGTCTCTCGACGTCAATTTGGGAGATGCATTCAAGCCC    |
| GILZ                 | NM_1980<br>57.2 | 1401-<br>1500 | TTAAGCAGAGGCAACCTCTCTTCTCTCTGTTTCGTGAAGGCAGGGGACACAGAT<br>GGGAGAGATTGAGCCAAGTCAAGCCTTCTGTTGGTTAATATGGT    |
| TSLP                 | NM_0330<br>35.3 | 396-495       | CCGTCTTGTAGCAATCGGCCACATTGCCTTACTGAAATCCAGAGCCTAACCTTCAA<br>TCCCACCGCCGGCTGCGCGTCTCGCCAAAGAAATGTTTCGC     |

|                   |                    |               |                                                                                                           |
|-------------------|--------------------|---------------|-----------------------------------------------------------------------------------------------------------|
| Txk               | NM_0033<br>28.1    | 801-900       | ATGACTCGTCTCCGATATCCAGTTGGGCTGATGGGCAGTTGTTTACCAGCCACAGCT<br>GGGTTTAGCTACGAAAAGTGGGAGATAGATCCATCTGAGTTGG  |
| TYK2              | NM_0033<br>31.3    | 486-585       | TCATCGCTGACAGCTGAGGAAGTCTGCATCCACATTGCACATAAAGTTGGTATCACTC<br>CTCCTTGCTTCAATCTCTTTGCCCTCTTCGATGCTCAGGCC   |
| DAP12             | NM_0033<br>32.3    | 362-461       | TCCAGGGTCAGAGGTCGGATGTCTACAGCGACCTCAACACACAGAGGCCGTATTACA<br>AATGAGCCCCGAATCATGACAGTCAGCAACATGATACCTGGATC |
| STS2<br>(Ubash3a) | NM_0010<br>01895.1 | 1971-<br>2070 | GAGATGCTGCTGTTTCCAGAGGCGTCTTAGTCTCACCAATGTGATTTGTAGAAGCAC<br>GAGACGCACTTTTATATCCCGGAATATTTCCCTCCGGCTTTC   |
| Unc5a             | NM_1333<br>69.2    | 1117-<br>1216 | CTCATCGCCGTGGCCGTCTGCCTGGTCTGCTGCTGCTTGTCTCATCTCGTTTATTG<br>CCGGAAGAAGGAGGGGCTGGACTCAGATGTGGCTGACTCGT     |
| Vax2              | NM_0124<br>76.2    | 872-971       | CAGCGCCAGCAGCTGCAAGAAAGCTAACACTTAAGACTCCCACCCTGTGACTGAG<br>TCCCGAGCACAGCACCTTCCAGTCTCCTGTGCCCCAGCGGAC     |
| VEGFA             | NM_0010<br>25366.1 | 1326-<br>1425 | GAGTCCAACATCACCATGCAGATTATGCGGATCAAACCTACCAAGGCCAGCACATA<br>GGAGAGATGAGCTTCTACAGCACAACAATGTGAATGCAGAC     |
| WEE1              | NM_0033<br>90.3    | 1226-<br>1325 | TATGCCATTAAGCGATCAAAAAAGCCATTGGCGGGCTCTGTTGATGAGCAGAACGCT<br>TTGAGAGAAGTATATGCTCATGCAGTGCTTGGACAGATTCTC   |
| Xbp1              | NM_0010<br>79539.1 | 936-1035      | ATTCATTGTCTCAGTGAAGGAAGAACCTGTAGAAGATGACCTCGTTCCGGAGCTGGG<br>TATCTCAAATCTGCTTTCATCCAGCCACTGCCCAAAGCCATCT  |
| XBP-1             | NM_0050<br>80.2    | 441-540       | GGAGTTAAGACAGCGCTTGGGGATGGATGCCCTGGTTGCTGAAGAGGAGGCGGAA<br>GCCAAGGGGAATGAAGTGAGGCCAGTGCCGGGTCTGCTGAGTCC   |
| XCL1              | NM_0029<br>95.1    | 621-720       | GTACCTCTTTGATGGTAACCATAATGGAAGAGATTCTGGCTAGTGTCTATCAGAG<br>GTGAAAGCTATATCAATCTCTCTTAGAGTCCAGCTTGTAAATGG   |
| YES1              | NM_0054<br>33.3    | 266-365       | ATACAGACCTGAAAATACTCCAGAGCCTGTCAAGTGTGAGCCATTATGGAGC<br>AGAACCCACTACAGTGTCAACCATGTCCGTCATCTTCAGCAAAG      |
| YAP               | NM_1391<br>18.2    | 756-855       | ATGGGAGCTATGCAGCTGATTGAAGACTTCAGCACACATGTCAGCATTGACTGCAGC<br>CCTCATAAACTGTCAAGAAGACTGCCAATGAATTTCCCTGTT   |
| ZAP70             | NM_0010<br>79.3    | 1176-<br>1275 | GGAGCTCAAGGACAAGAAGCTTTCCTGAAGCGCGATAACCTCCTCATAGCTGACAT<br>TGAACCTGGCTGCGGCAACTTTGGCTCAGTGCGCCAGGGCGTG   |
| PLZF              | NM_0060<br>06.4    | 1586-<br>1685 | TCCTGGATAGTTTTCGGCTGAGAATGCACCTACTGGCTCATTAGCGGGTGCCAAAG<br>CCTTTGTCTGTGATCAGTGCGGTGCACAGTTTTTCGAAGGAGGA  |
| Zbtb7             | NM_0158<br>98.2    | 555-654       | GACGCGGGCGCCGACGCGGGCAGCTGGACCTTGTAGATCAAATTGATCAGCGCAA<br>CCTCCTCCGCGCAAGGAGTACCTCGAGTTCTTCAGAGCAACC     |
| C80RF70           | NM_0160<br>10.2    | 666-765       | ACGATTACCGCAGCCAAGTGGCGCTGGCAAACTGTTGTAGGTGTTTCTTCAGGTAA<br>AGTGTCTTCAAGTAGCAGCTCTTTGGGAAACAACTTCAGACC    |
| ZEB2              | NM_0011<br>71653.1 | 241-340       | GTTTGTGTTTCTGGAGTGGCCGAAAGAGATCAGTTCTAACCTGCTCTGCAGGAATA<br>ACGGTCTGCCTCCCGACACTCTTGGCGAGGTTTTGTACAGT     |
| ZNF516            | NM_0146<br>43.2    | 4831-<br>4930 | GGTGGGGGACGGCTTCATATACCTCTTCTCAGTAATGCAAATGCGAGTTTTTGTGGT<br>GGGGTTAAGGCCATAACAAAGGATCTTAAACCATGCAGTG     |

**Supplemental Table 4:***Antigen-specific killing by CAR T cells used in the clinical trials*

| Patient # | Effector : Target Ratio |        |           |      |        |                  |        |           |      |        | % CAR |
|-----------|-------------------------|--------|-----------|------|--------|------------------|--------|-----------|------|--------|-------|
|           | 20:1                    |        |           |      |        | 5:1              |        |           |      |        |       |
|           | Daudi $\beta_2m$        | NALM-6 | CD19 EL-4 | EL-4 | No DNA | Daudi $\beta_2m$ | NALM-6 | CD19 EL-4 | EL-4 | No DNA |       |
| P446      | 64.8                    | 52.4   | 45.1      | 13.1 | 4.7    | 65.8             | 58.2   | 42.7      | 7.7  | 3.0    | 88    |
| P458      | 53.3                    | 51.2   | 43.9      | 9.6  | 4.9    | 41.4             | 29.7   | 35.3      | 4.4  | 1.2    | 77    |
| P468      | 54.0                    | 46.8   | 41.6      | 8.5  | 1.7    | 44.4             | 33.3   | 31.3      | 3.8  | -0.2   | 86    |
| P471      | 53.0                    | 49.6   | 52.7      | 16.9 | 1.3    | 45.6             | 35.3   | 45.3      | 7.7  | 0.4    | 96    |
| P509      | 64.1                    | 55.1   | 43.7      | 3.9  | 1.5    | 57.8             | 49.0   | 39.8      | 2.9  | 3.6    | 96    |
| P747      | 56.3                    | 50.6   | 36.4      | 4.3  | 2.0    | 52.4             | 40.9   | 32.9      | 1.4  | 1.9    | 88    |
| P411      |                         |        | 30.3      | 2.9  | 8.0    |                  |        | 24.7      | 0.7  | 6.5    | 71    |
| P580      | 52.5                    | 38.2   | 38.4      | 9.1  | 8.8    | 40.7             | 24.5   | 30.4      | 5.1  | 9.2    | 70    |
| P410      | 65.9                    | 54.9   | 49.2      | 19.5 | 2.3    | 63.6             | 51.0   | 41.6      | 13.8 | 2      | 90    |
| P396      | 64.3                    | 58.0   | 55.7      | 15.9 | 2.4    | 54.6             | 44.5   | 47.5      | 9.8  | 2.2    | 97    |
| P513      | 66.1                    | 57.5   | 51.6      | 20.2 | 4.4    | 59.5             | 46.7   | 41.9      | 12.1 | 3.1    | 88    |
| P732      | 57.5                    | 54.2   | 51.8      | 24.7 | 5.4    | 56.3             | 50.2   | 48.0      | 14.8 | 4.9    | 84    |
| P671      | 62.4                    | 58.0   | 51.9      | 20.8 | -0.5   | 54.8             | 51.6   | 47.4      | 10.6 | -0.2   | 95    |
| P617      | 57.2                    | 48.6   | 31.4      | 9.7  | 29.0   | 55.5             | 41.7   | 33.9      | 7.3  | 26     | 67    |
| P564      | 60.1                    | 54.3   | 40.1      | 5.1  | 1.7    | 55.9             | 46.5   | 39.9      | 2.7  | 2.9    | 91    |
| P723      | 60.6                    | 51.9   | 52.8      | 15.7 | -17.2  | 51.8             | 41.9   | 46.9      | 6.6  | -13.1  | 47    |
| P716      | 58.3                    | 51.8   | 48.1      | 10.5 | 0.2    | 57.8             | 45.2   | 45.8      | 5.7  | -0.3   | 65    |
| P771      | 58.2                    | 48.9   | 37.9      | 8.9  | 0.8    | 51.6             | 37.9   | 30.7      | 5.9  | 1.3    | 93    |
| P718      | 59.4                    | 52.9   | 43.4      | 8.2  | 0.5    | 58.7             | 46.1   | 40.6      | 5.4  | 1.5    | 92    |
| P641      | 54.2                    | 45.1   | 26.7      | 4.9  | 15.5   | 49.9             | 39.7   | 24.5      | 3.0  | 10.2   | 75    |
| P647      | 63.7                    | 45.3   | 34.8      | 4.4  | 3.4    | 52.9             | 36.7   | 30.1      | 2.3  | 2.5    | 87    |
| P783      | 64.3                    | 52.0   | 39.5      | 5.8  | 0.1    | 58.9             | 41.9   | 35.8      | 4.3  | -0.2   | 94    |
| P788      | 63.8                    | 38.1   | 37.3      | 9.1  | 3.4    | 52.9             | 44.6   | 29.1      | 5.3  | 1      | 84    |
| P753      | 58.9                    | 47.6   | 35.7      | 7.1  | 18.4   | 52.2             | 36.4   | 27.7      | 2.2  | 16.2   | 58    |

The antigen-specific cytotoxicity of SB-modified CAR T cells was assessed using <sup>51</sup>Cr-release assays via standard techniques. The human tumor lines Daudi (genetically modified to express b-2-microglobulin) and NALM-6 express endogenous CD19. The immortalized mouse T-cell line EL-4 does not express human CD19, but the sub-line CD19EL-4 has been genetically modified to homogeneously express human truncated CD19. CAR T cells were mixed with the designated targets at effector:target ratios of 20:1 and 5:1. The % specific cytolysis for each target by each cell product is shown. Parental EL-4 cells reflect antigen non-specific cytolysis of the manufactured product, while the “No DNA” column reflects the target cytolysis observed for mock-transformed T cells (cells undergoing the SB transformation process without plasmid DNA) that themselves serve as targets (from the same donor as the genetically modified effector T cells). The final column shows the percent CAR expression on each cell product.

**Supplemental Table 5:***Characteristics of peripheral blood in recipient on day of T-cell infusion*

| UPN  | Auto or Allo | WBC at infusion [K/ $\mu$ L] | %lymph | CD3 (ATC) [% & K/ $\mu$ L] | CD4 [% & K/ $\mu$ L] | CD8 [% & K/ $\mu$ L] | CD19 (ABC) [% & K/ $\mu$ L] |
|------|--------------|------------------------------|--------|----------------------------|----------------------|----------------------|-----------------------------|
| P446 | Auto         | 0.2                          | N/A    | N/A                        | N/A                  | N/A                  | N/A                         |
| P458 | Auto         | 1                            | 5.8    | N/A                        | N/A                  | N/A                  | N/A                         |
| P468 | Auto         | 0.4                          | 12     | N/A                        | N/A                  | N/A                  | N/A                         |
| P471 | Auto         | 0.4                          | 40     | N/A                        | N/A                  | N/A                  | N/A                         |
| P509 | Auto         | 0.1                          | N/A    | N/A                        | N/A                  | N/A                  | N/A                         |
| P747 | Auto         | 0.2                          | N/A    | N/A                        | N/A                  | N/A                  | N/A                         |
| P708 | Auto         | 0.1                          | N/A    | N/A                        | N/A                  | N/A                  | N/A                         |
| P396 | Allo         | 4.7                          | 25     | 73%<br>3.42                | 1%<br>4.64           | 33%<br>1.55          | 2%<br>0.11                  |
| P410 | Allo         | 5.6                          | 16     | 7%<br>0.38                 | 7%<br>0.37           | 23%<br>1.26          | 0%<br>0.00                  |
| P411 | Allo         | 1.2                          | 11     | 39%<br>0.46                | 20%<br>0.24          | 19%<br>0.23          | 0%<br>0.00                  |
| P513 | Allo         | 3.5                          | 37     | 87%<br>3.04                | 13%<br>0.46          | 73%<br>2.54          | 0%<br>0.00                  |
| P580 | Allo         | 5.8                          | 12.3   | ND                         | ND                   | ND                   | ND                          |
| P459 | Allo         | 6.7                          | 32.8   | 63%<br>4.19                | 27%<br>1.81          | 32%<br>2.12          | 2%<br>0.12                  |
| P564 | Allo         | 2                            | 32.3   | 62%<br>1.22                | 45%<br>0.9           | 16%<br>0.31          | 0%<br>0.00                  |
| P617 | Allo         | 6.6                          | 9.9    | ND                         | ND                   | ND                   | ND                          |
| P671 | Allo         | 6.1                          | 6      | 2%<br>0.12                 | 2%<br>0.11           | 0%<br>0.01           | 0%<br>0.00                  |
| P723 | Allo         | 2.8                          | 27     | 18%<br>0.51                | 8%<br>0.22           | 5%<br>0.13           | 0%<br>0.00                  |
| P732 | Allo         | 3.8                          | 5.3    | 9%<br>0.33                 | 3%<br>0.12           | 5%<br>0.19           | 0%<br>0.00                  |
| P641 | Allo         | 3                            | 39.5   | 85%<br>2.55                | 26%<br>0.77          | 57%<br>1.71          | 0%<br>0.01                  |
| P647 | Allo         | 9.2                          | 44     | 71%<br>6.53                | 23%<br>2.11          | 45%<br>4.12          | 0%<br>0.00                  |
| P716 | Allo         | 2.8                          | 12.4   | 55%<br>1.52                | 34%<br>0.94          | 18%<br>0.50          | 0%<br>0.00                  |
| P718 | Allo         | 1.3                          | 44     | 56%<br>0.72                | 16%<br>0.20          | 39%<br>0.50          | 0%<br>0.00                  |
| P771 | Allo         | 6.2                          | 8.5    | 30%<br>1.85                | 18%<br>1.12          | 9%<br>0.54           | 0%<br>0.02                  |
| P783 | Allo         | 4                            | 3.5    | 1%<br>0.06                 | 0%<br>0.02           | 1%<br>0.04           | 0%<br>0.00                  |

WBC = white blood cell count, ATC = absolute T-cell count, ABC = absolute B-cell count, N/A= not available, ND= not done.

**Supplemental Table 6: Timing of infusion of CAR T cells from venipuncture to after infusion of peripheral blood stem cells (PBSC)**

| UPN    | Auto or Allo | <sup>a</sup> Time to cryopreservation of genetically modified T cells (days) | <sup>b</sup> Time to cryopreservation (days) | <sup>a</sup> Time to infusion (days) | <sup>b</sup> Time to infusion (days) | Days between PBSC and T-cell infusions |
|--------|--------------|------------------------------------------------------------------------------|----------------------------------------------|--------------------------------------|--------------------------------------|----------------------------------------|
| P446   | Auto         | 29                                                                           | 29                                           | 77                                   | 77                                   | 2                                      |
| P458   | Auto         | 25                                                                           | 32                                           | 48                                   | 55                                   | 2                                      |
| P468   | Auto         | 29                                                                           | 30                                           | 60                                   | 61                                   | 3                                      |
| P471   | Auto         | 29                                                                           | 30                                           | 57                                   | 58                                   | 2                                      |
| P509†  | Auto         | 31                                                                           | 44                                           | 58                                   | 71                                   | 3                                      |
| P747   | Auto         | 29                                                                           | 29                                           | 69                                   | 69                                   | 2                                      |
| P708   | Auto         | 30                                                                           | 30                                           | 49                                   | 49                                   | 4                                      |
| P396†  | Allo         | 30                                                                           | 45                                           | 66                                   | 81                                   | 64                                     |
| P410†  | Allo         | 29                                                                           | 35                                           | 61                                   | 67                                   | 54                                     |
| P411†  | Allo         | 31                                                                           | 57                                           | 64                                   | 90                                   | 71                                     |
| P513†  | Allo         | 34                                                                           | 45                                           | 55                                   | 66                                   | 66                                     |
| P580*  | Allo         | 32                                                                           | 70                                           | 89                                   | 90                                   | 81                                     |
| P459*† | Allo         | 35                                                                           | 54                                           | 84                                   | 90                                   | 62                                     |
| P564   | Allo         | 29                                                                           | 30                                           | 70                                   | 71                                   | 64                                     |
| P617   | Allo         | 30                                                                           | 30                                           | 69                                   | 69                                   | 43                                     |
| P671   | Allo         | 27                                                                           | 27                                           | 95                                   | 95                                   | 45                                     |
| P723   | Allo         | 34                                                                           | 35                                           | 61                                   | 62                                   | 54                                     |
| P732   | Allo         | 27                                                                           | 28                                           | 53                                   | 54                                   | 46                                     |
| P641   | Allo         | 22                                                                           | 23                                           | 88                                   | 89                                   | 68                                     |
| P647   | Allo         | 22                                                                           | 22                                           | 55                                   | 55                                   | 57                                     |
| P716   | Allo         | 27                                                                           | 28                                           | 63                                   | 64                                   | 56                                     |
| P718   | Allo         | 33                                                                           | 34                                           | 125                                  | 126                                  | 56                                     |
| P771   | Allo         | 29                                                                           | 30                                           | 67                                   | 68                                   | 67                                     |
| P783   | Allo         | 29                                                                           | 30                                           | 62                                   | 63                                   | 49                                     |

The time from genetic modification to end of culture period and T-cell preservation (time to cryopreservation), time to CAR<sup>+</sup> T-cell infusion, and time from HSCT (infusion of PBSC) to CAR T-cell infusion

<sup>a</sup> Time to T-cell cryopreservation or infusion from genetic modification/start of T-cell culture

<sup>b</sup> Time to T-cell cryopreservation or infusion from phlebotomy

\* Culture re-initiation at day 14/d20 (P580/P459) from in-process cryopreserved products

† Peripheral blood-derived samples were initially cryopreserved before subsequent SB-mediated genetic modification

**Supplemental Table 7: Average time of CAR T-cell persistence in autologous and allogeneic recipients after infusion determined by ddPCR**

| T-cell Dose Level and recipients (allo versus auto) | Number of patients infused | Average time (days) transgene detected | Maximum time (days) transgene detected |
|-----------------------------------------------------|----------------------------|----------------------------------------|----------------------------------------|
| A (allo)                                            | 5                          | 78                                     | 180                                    |
| B (allo)                                            | 6                          | 65                                     | 90                                     |
| C (allo)                                            | 8                          | 24                                     | 90                                     |
| MSD (allo)                                          | 11                         | 49                                     | 90                                     |
| Haplo (allo)                                        | 8                          | 54                                     | 180                                    |
| A (auto)                                            | 5                          | 234                                    | 360                                    |
| B (auto)                                            | 2                          | 120                                    | 180                                    |
| All Auto patients                                   | 7                          | 201                                    | 360                                    |
| All Allo patients                                   | 19                         | 51                                     | 180                                    |

**Supplemental Table 8: Recipients that received a second CAR T-cell infusion**

| Protocol | UPN                        | WBC<br>[K/ $\mu$ L] | ALC<br>[K/ $\mu$ L] | CD3<br>[% & K/ $\mu$ L] | CD4<br>[% & K/ $\mu$ L] | CD8<br>[% & K/ $\mu$ L] |
|----------|----------------------------|---------------------|---------------------|-------------------------|-------------------------|-------------------------|
| Allo     | P396 CIND                  | 3.7                 | 0.71                | 50%<br>0.36             | 26%<br>0.18             | 20%<br>0.14             |
| Allo     | P410 CIND                  | 4.8                 | 0.67                | 44%<br>0.29             | 9%<br>0.06              | 34%<br>0.23             |
| Allo     | P564 (2nd inf)             | 2.5                 | 0.16                | 61%<br>0.1              | 45%<br>0.07             | 15%<br>0.02             |
| Allo     | P647 (2 <sup>nd</sup> inf) | 8.7                 | 3.96                | 89%<br>3.5              | 23%<br>0.91             | 37%<br>1.47             |
| Allo     | P671 (2 <sup>nd</sup> inf) | 6.1                 | 2.89                | *49%<br>1.4             | *23%<br>0.66            | *24%<br>0.69            |

WBC = white blood cell count, at time of infusion (inf)

ALC = absolute lymphocyte count at time of infusion

%CD3, %CD4 and %CD8 were calculated from lymphocyte gate (FSC/SSC) using flow cytometry

\*Percentages from last time point previous to second T cell infusion were used, as pre-infusion sample was not available.



**Supplemental Table 9: Genes that contain CAR within exons**

| Chromosome | Gene name    | Exon |
|------------|--------------|------|
| 1          | RP5-837M10.3 | 2    |
| 2          | KCMF1        | 10   |
| 3          | DAZL         | 12   |
| 3          | TMF1         | 20   |
| 4          | CCDC149      | 17   |
| 6          | C6orf64      | 4    |
| 6          | USP45        | 32   |
| 7          | EPHA1        | 8    |
| 8          | ERLIN2       | 16   |
| 11         | GAS2         | 8    |
| 12         | MDM2         | 11   |
| 14         | RBM23        | 20   |
| 15         | KIAA1370     | 15   |
| 16         | SSU_rRNA_5   | 1    |
| 16         | RFWD3        | 13   |
| 17         | UNC45B       | 21   |
| 19         | ZNF529       | 8    |
| 19         | NAPA         | 5    |
| 20         | ZGPAT        | 8    |
| 22         | TMEM184B     | 5    |
| 22         | TOMM22       | 4    |
| X          | WWC3         | 25   |
| X          | RPGR         | 26   |

Unique chromosomal positions are listed even though a particular positions can have many/multiple reads.

# SUPPLEMENTAL FIGURES

## Supplemental Figure 1

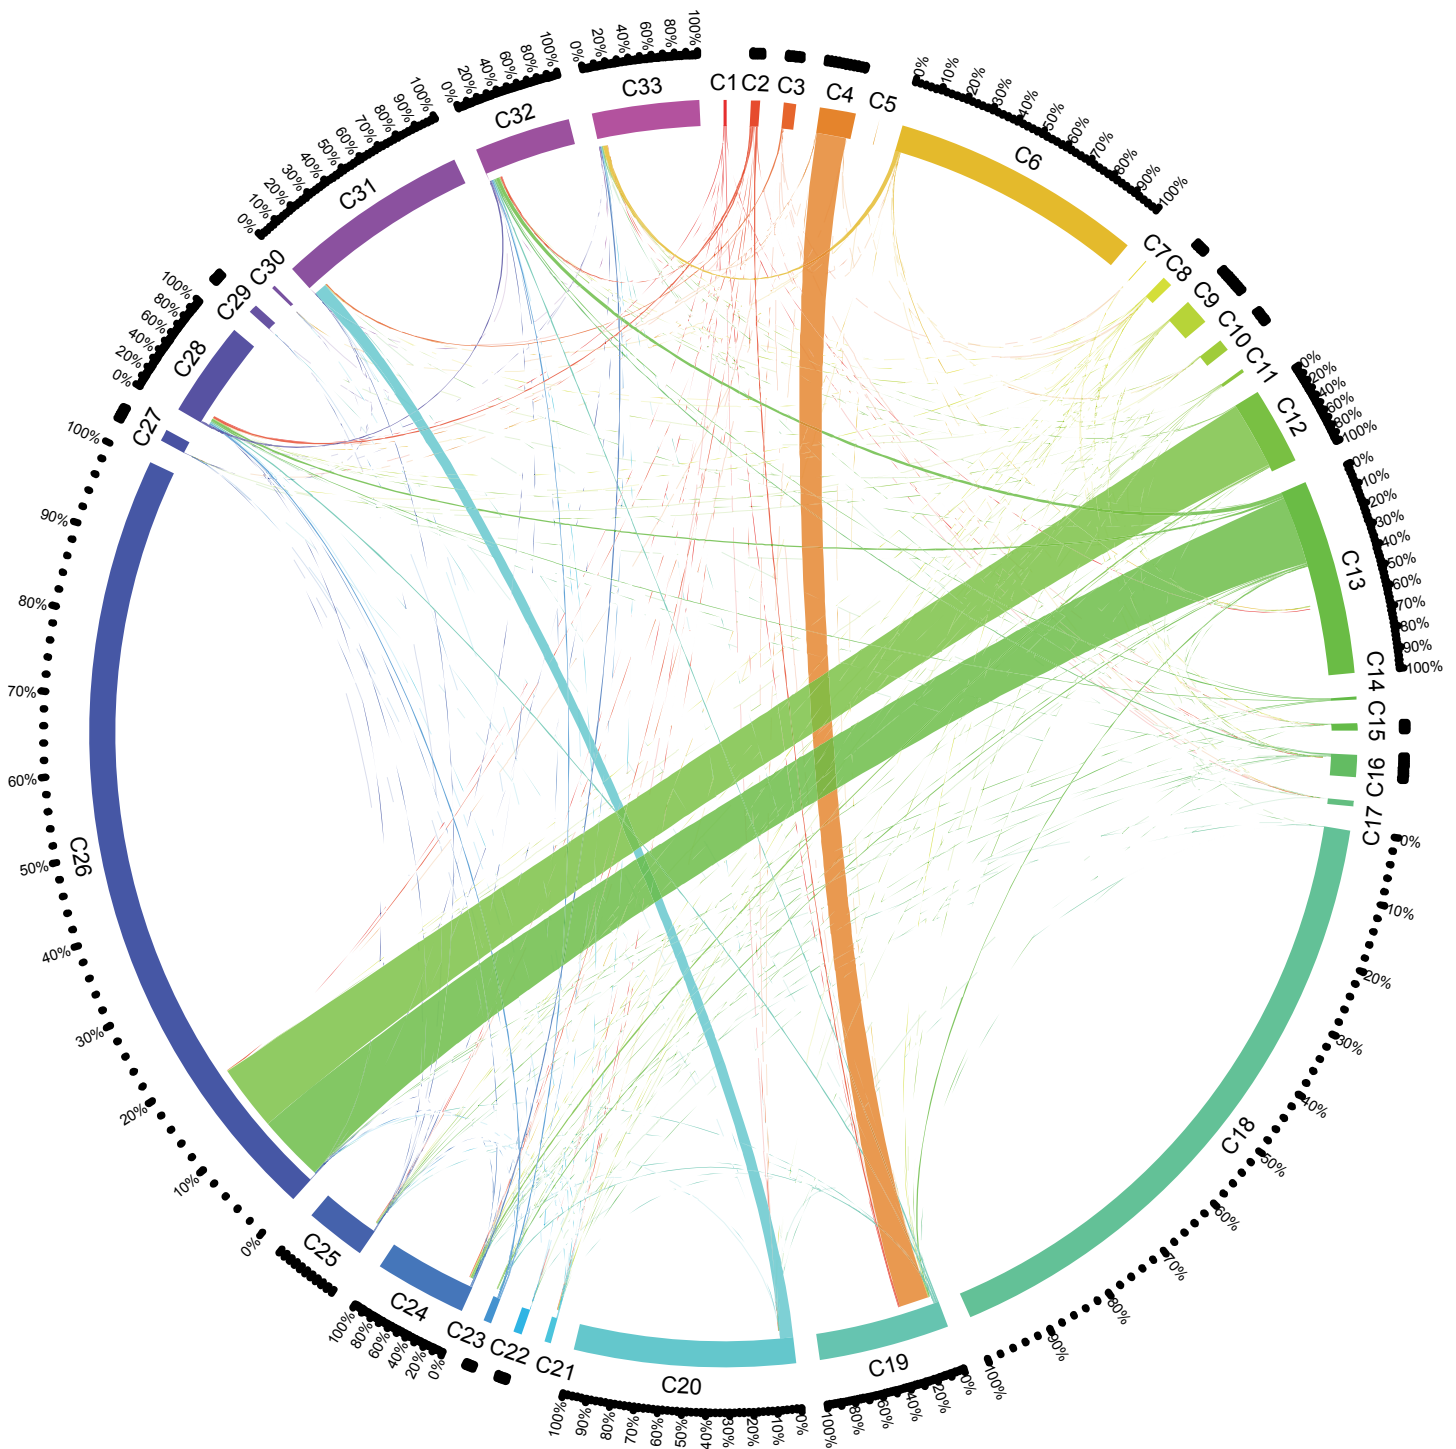

High throughput sequencing to reveal distribution of CAR integrants after SB-mediated transposition in primary T cells. Genomic DNA libraries were made from independent polyclonal

populations of T cells that had been genetically modified with the SB system to express CD19RCD28, and the precise integration site for each insertion was determined in each library. The figure consists of a circos plot of the CAR transgene common insertion sites (CIS). Each library is represented by colored bars around the periphery, sized in proportion to the number of insertion sites. The outer ring is populated by relative scales (0 to 100%) apportioning each library. The number of insertion sites common between libraries is linked by weight-sized ribbons, colored according to each origination library. Libraries C4, C12 and C13 have relatively large portions of insertion sites in common with other libraries (C19 and C26), while C18, which has a relatively large number of insertions, has relatively low or no insertion sites in common with other libraries. We matched insertions within exons using BLAST against human reference genome (hg19). Intragenic insertions are defined as insertions within either 5' UTR, exonic, intronic, or 3' UTR. The majority (96.5%) of intragenic insertions are within intronic regions while only 3.5% of integrants are within coding (exonic) and non-coding (5' UTR and 3' UTR) regions. Insertions with the same chromosomal coordinates were binned and unique insertions tabulated. **Supplemental Table 9** lists coding region (exonic) insertions.

# Supplemental Figure 2

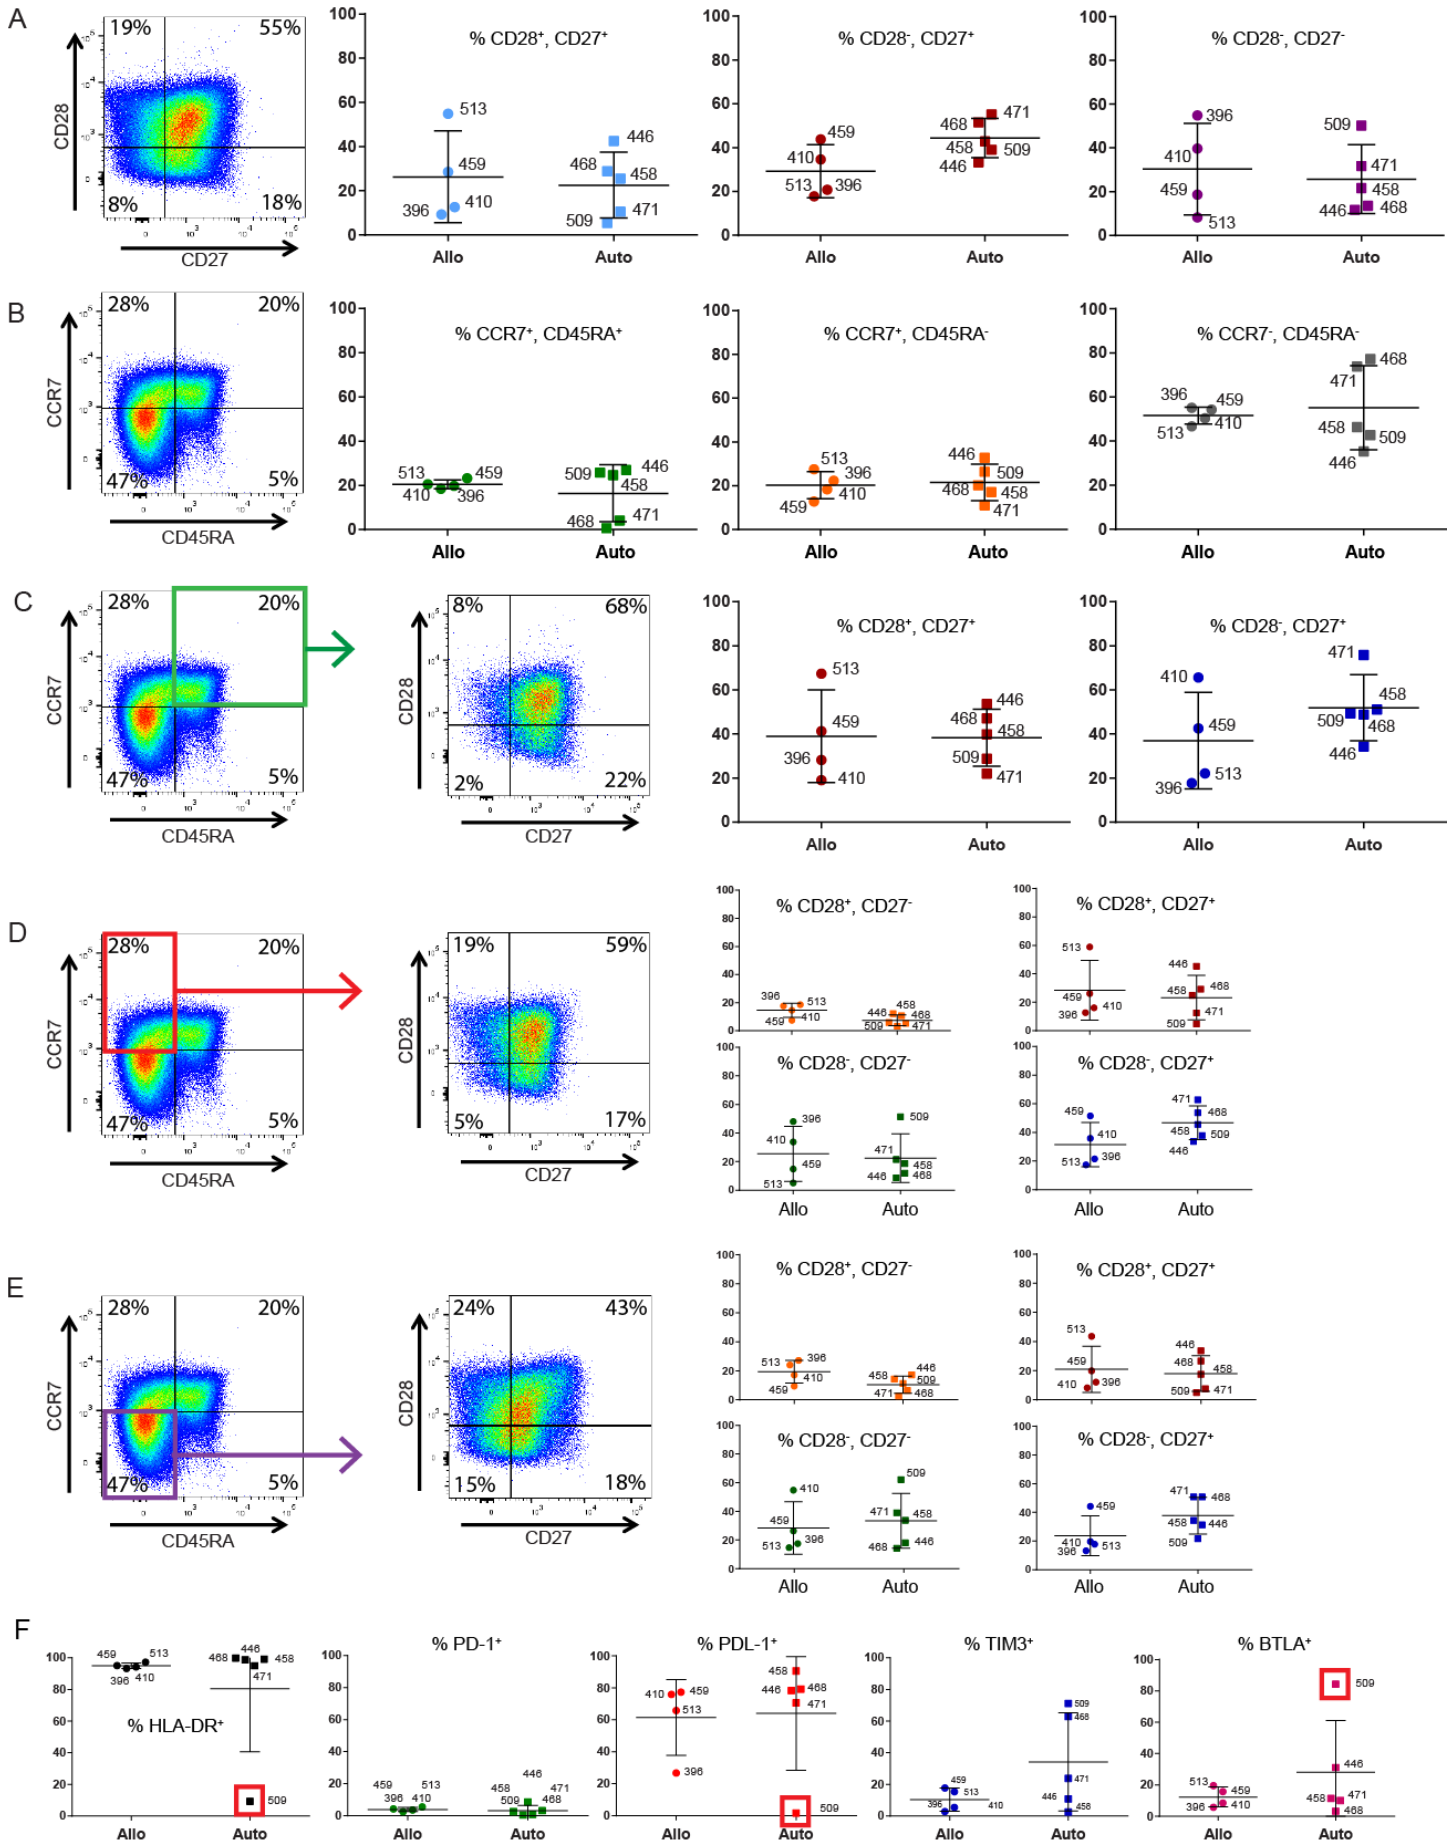

**Phenotype of clinical-grade is no genetically modified T cells:** Multi-parameter flow cytometry was used to evaluate co-expression of CD27, CD28, CCR7 and CD45RA on the CAR T cells, assessing the proportion of  $T_{SCM}$  or,  $T_N$  ( $CCR7^+CD45RA^+CD28^+CD27^+$ )  $T_{CM}$  ( $CCR7^+CD45RA^{neg}CD28^+CD27^+$ ),  $T_{EM}$  ( $CCR7^{neg}CD45RA^{neg}CD28^{\pm}CD27^{\pm}$ ) and exhausted/immune-incompetent T cells. **(A)** The color histogram displays the expression of CD27 and CD28 from a representative sample of CAR T cells (P513), and the panels to the right show the percentage of cells with each phenotype from the allogeneic (left side of each panel) and autologous (right side of each panel) patient infusion products tested. **(B)** Expression of CD45RA and CCR7 for the same cells shown in (A). The  $CD3^+$ ,  $CAR^+$ ,  $CCR7^+$ ,  $CD45RA^{neg}$  subset was  $20.2 \pm 6.2\%$  (autologous,  $n = 5$ ) and  $21.5 \pm 8.4\%$  (allogeneic,  $n = 4$ ) of the total. Gating on the  $CD45RA^+CCR7^+CAR^+$  lymphocytes **(C)**, the  $CD45RA^{neg}CCR7^+CAR^+$  lymphocytes **(D)** and the  $CD45RA^{neg}CCR7^{neg}CAR^+$  lymphocytes **(E)**, the expression of CD27 and CD28 for each subpopulation is shown for a representative sample, with panels showing the individual and mean  $\pm$  standard deviation for each quadrant displayed on the right. **(F)** Expression of HLA-DR, PD-1, PDL-1, TIM3 and BTLA is shown for each patient, as per similar panels in **Supplemental Fig. 2A-2E**. The red box outlining P509 highlights the reduced expression of activation markers on the infused cells of the one autologous patient who experienced relapsed disease.

### Supplemental Figure 3

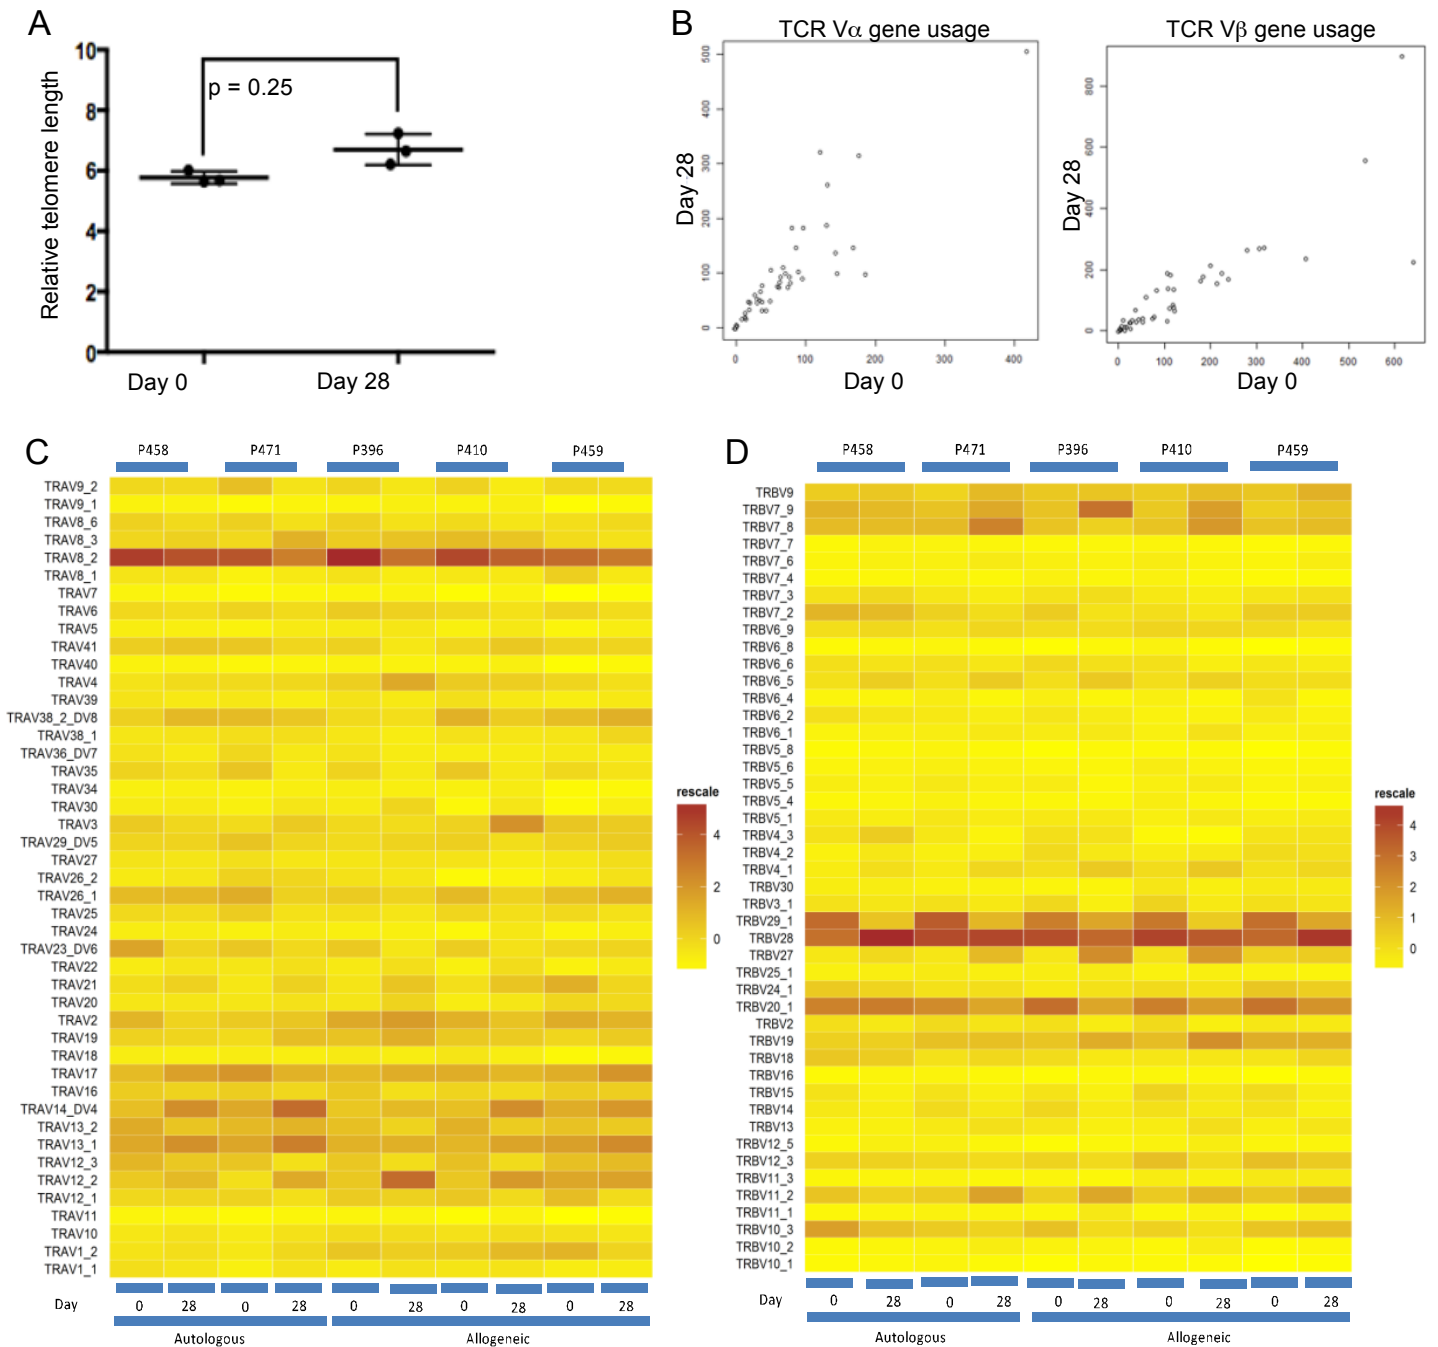

**Telomere length and molecular analysis of clinical-grade CAR T cells.** (A) The relative telomere length was compared for three genetically modified T-cell products on Days 0 and 28 of tissue culture. mRNA from PBMC at day 0 and *ex vivo*-expanded CAR T cells harvested on day 28 of co-culture with AaPC/cytokines was used in digital multiplexed assay (using the NanoString nCounter) to quantify the amount of mRNA coding for 45 TCR V $\alpha$  and 46 TCR V $\beta$  chains using direct TCR expression assay (DTEA). Cells harvested on Day 0 (unmodified T cells) were used as pre-

electroporation controls. **(B)** Scatter plots from a representative patient comparing day 0 and day 28 TCR V $\alpha$  and V $\beta$  gene usage are shown. Heat maps display the relative expression of each of the 45 TCR V $\alpha$  **(C)** and TCR V $\beta$  **(D)** genes on days 0 and 28 (P396; correlation coefficient ( $\rho$ ) = 0.85; P410;  $\rho$  = 0.83; P458;  $\rho$  = 0.94; P459;  $\rho$  = 0.93 and P471;  $\rho$  = 0.87). All correlation coefficients are greater than 0.8, thus the TCR V $\alpha$  and TCR V $\beta$  repertoire expression patterns are similar between day 0 and day 28 in these 5 patients.

## Supplemental Figure 4

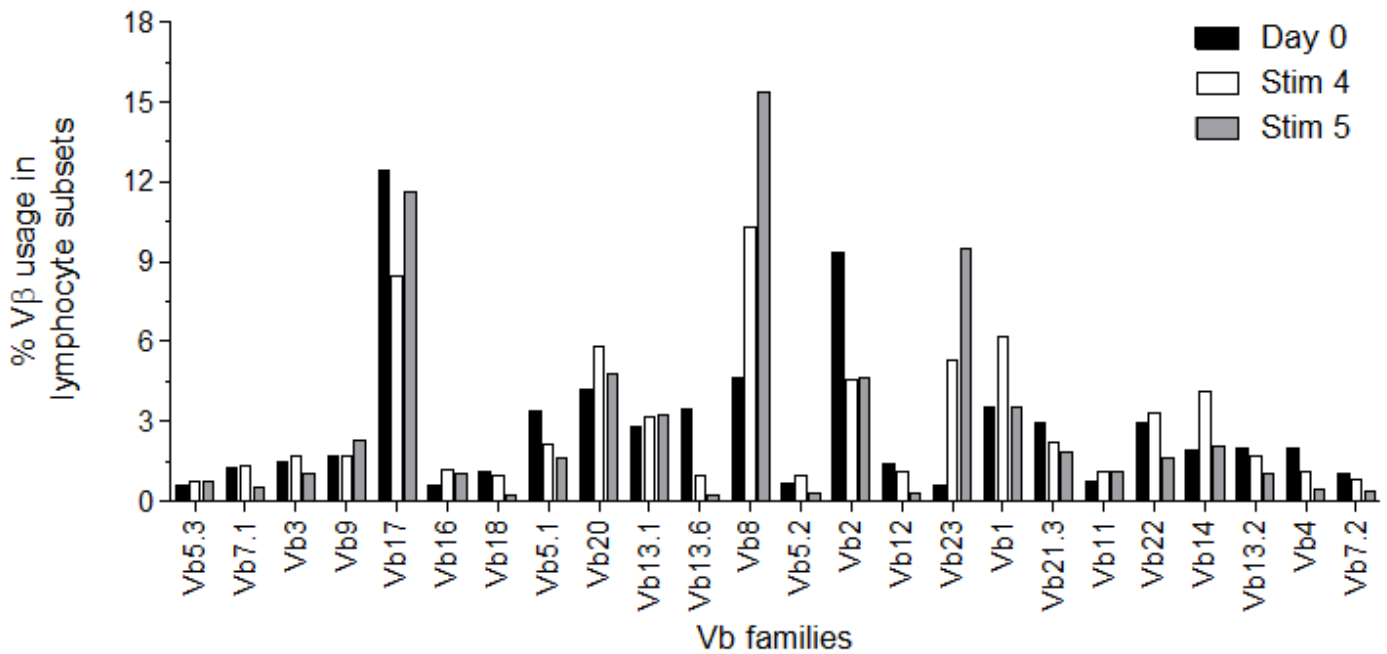

### Distribution of TCR Vβ before and after electroporation and extended *ex vivo* propagation.

CAR T cells (P411) underwent five cycles of AaPC-mediated stimulation and numerically expanded in culture to day 35. The TCR Vβ repertoire was assessed by flow cytometry prior to SB gene modification, after four cycles of stimulation (*i.e.*, the cells that were infused into the patient, harvested at day 28 of culture time) and following 35 total days of culture. No significant differences in TCR Vβ use were observed, showing that SB gene modification did not cause outgrowth of an oligoclonal population of manufactured T cells.



## Supplemental Figure 5

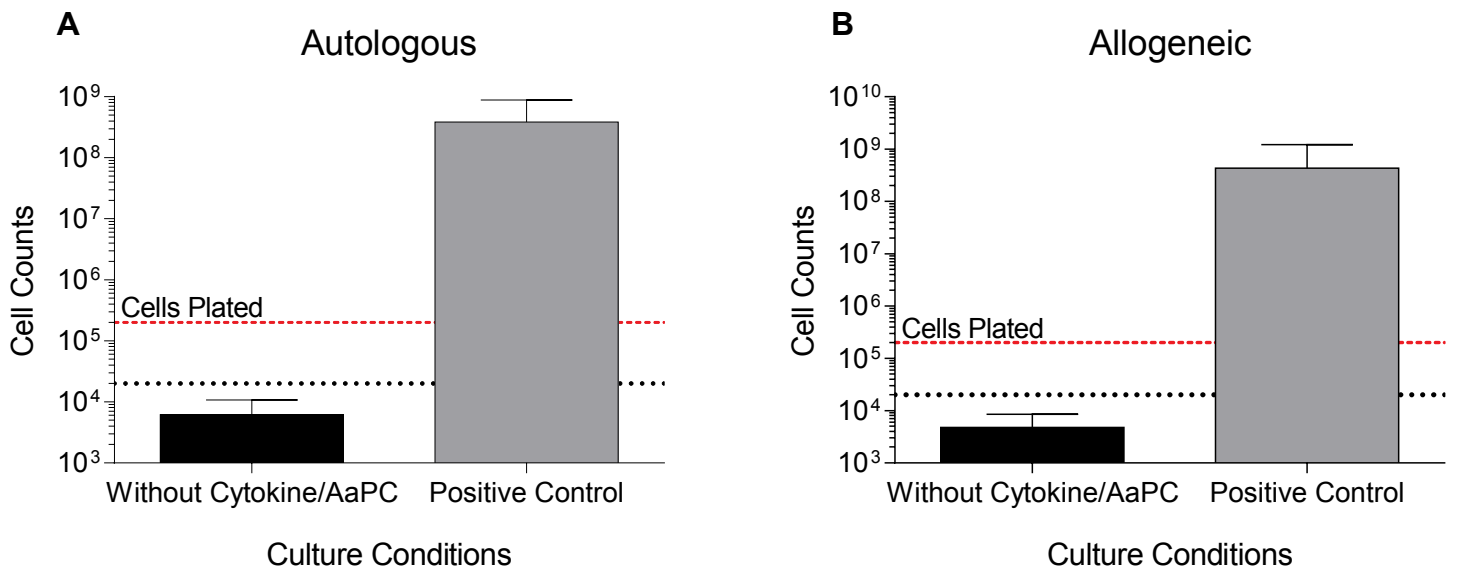

**Confirmation of the absence of autonomous growth of clinical-grade CAR T cells.** CAR T cells ( $2 \times 10^5$ , red dashed line) derived from (A) autologous patients ( $n = 7$ ) and (B) allogeneic donors ( $n = 16$ ) were continuously cultured for 18 days in the absence or presence of cytokines (IL-2 at 50U/mL, IL-21 at 30 ng/mL, cytokines added on a Monday-Wednesday-Friday schedule) and  $\gamma$ -irradiated AaPC (at 1:2 ratio of T cells to AaPC). Lack of autonomous growth for CAR T cells was defined when counts were  $\leq 2 \times 10^4$  (black dotted line) at the end of 18 days in the absence of stimulation.

## Supplemental Figure 6

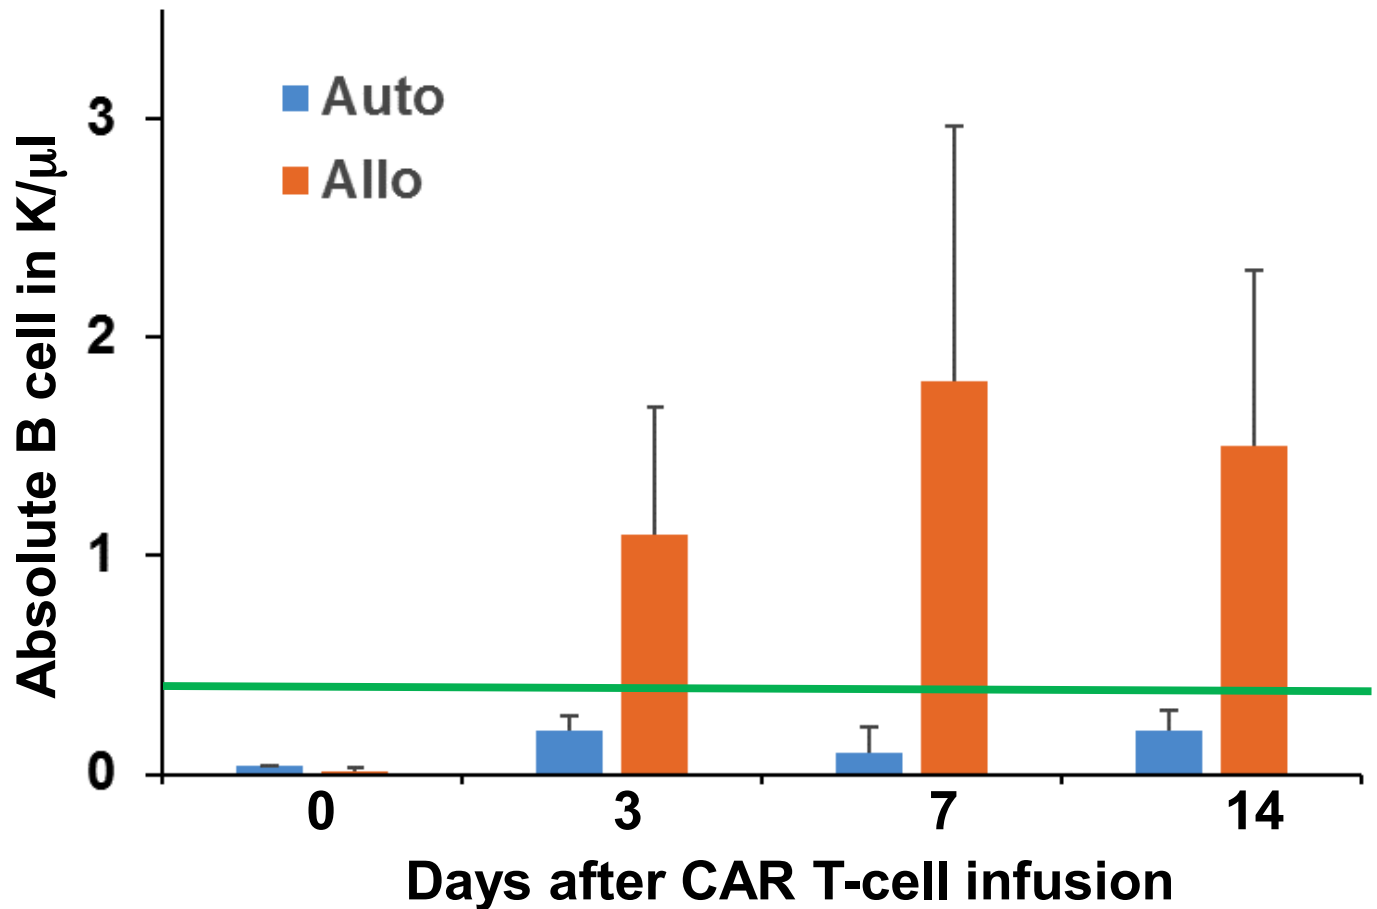

**Measurement of circulating CD19<sup>+</sup> B cells in peripheral blood following infusion of CD19-specific CAR T cells.** Average ( $\pm$  standard error of the mean) B cell number in peripheral blood was determined by multiplying the percentage of lymphocytes expressing CD19 (determined by flow cytometry) by the absolute lymphocyte number. The green line represents the average normal number of peripheral blood (CD19<sup>+</sup>) B cells, determined from allogeneic donor data presented in Supplemental Table 1. Values are shown in thousands per  $\mu\text{L}$ .

## Supplemental Figure 7

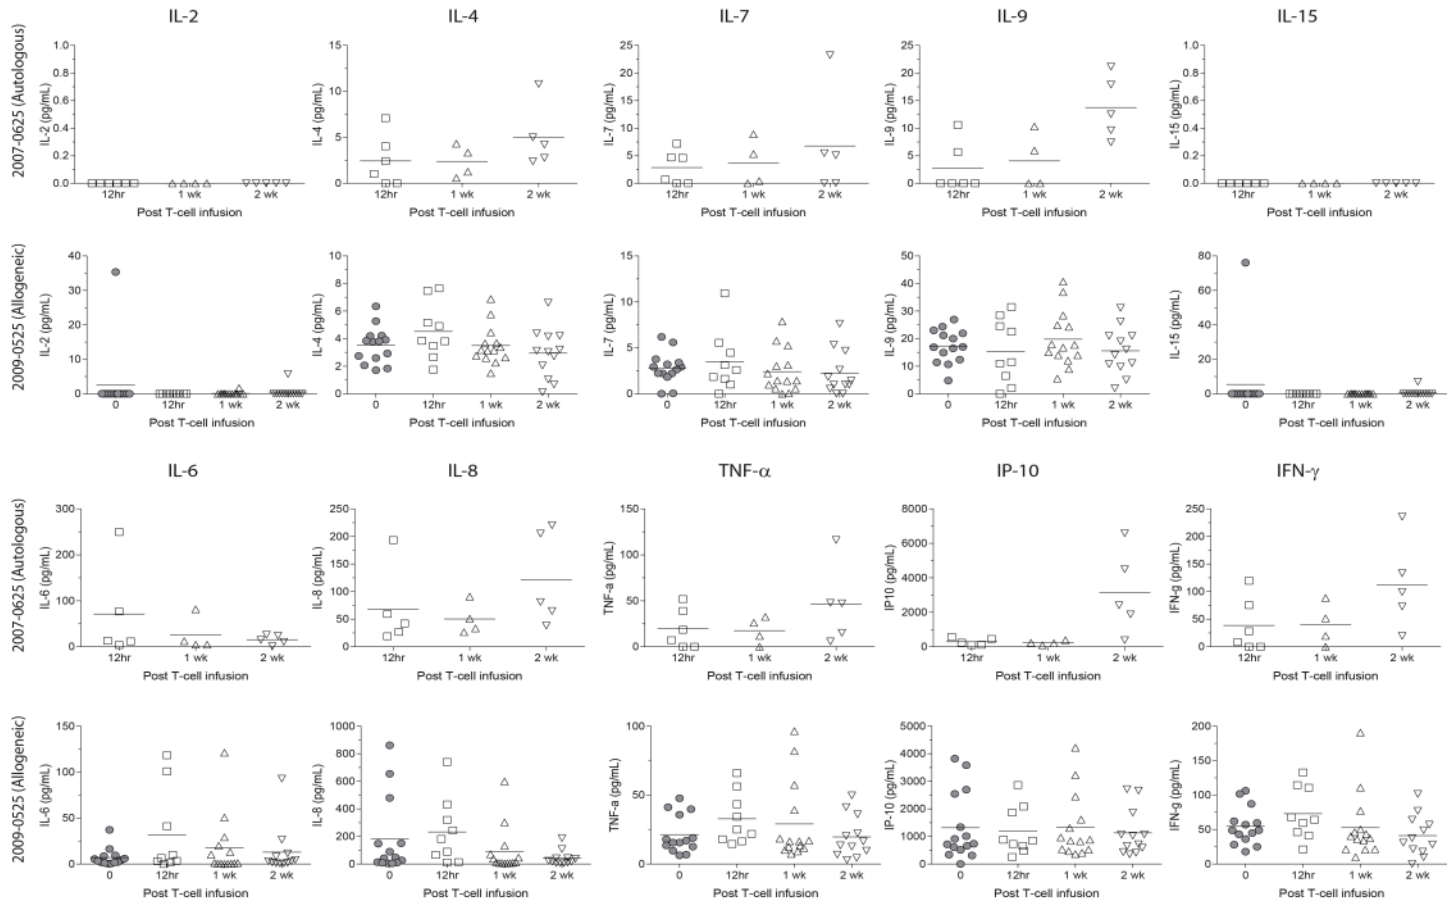

**Level of cytokines that signal through common  $\gamma$ -chain receptor in recipients of autologous (n = 6) and allogeneic (n = 9) genetically modified CAR T cells.** Serum was isolated at the times indicated after T-cell infusion and frozen in aliquots at  $-80^{\circ}\text{C}$ . Samples were thawed, diluted 1:4 in complete media (10% FBS, 2mM Glutamax-1 in RPMI 1640) and evaluated using Bio-Plex Pro Human Cytokine 27-plex Assay (Bio-Rad, Hercules, CA) according to manufacturer's instruction using Luminex 100 or, Bio-Rad MAGPIX Multiplex Reader (Bio-Rad). The levels of each cytokine (in pg/mL) in patient serum are shown for each patient at each time point. Autologous patients are shown in the top panels and allogeneic patients in the bottom panels. The average value is designated by a heavy line. Note: the data for the 12 hour time point are the same as those shown in **Fig. 4B**. Several cytokines were elevated after infusion. IP-10 was markedly elevated in all allogeneic samples throughout follow-up and rose rapidly in the autologous patients and most patients had elevated

levels of IL-9 and interferon (IFN)- $\gamma$  with low levels of IL-4. The role of the elevated cytokines in supporting the sustained persistence of the infused T cells is unclear, but it is notable that the infused T cells could be detected despite the low levels of cytokines that signal through the common cytokine  $\gamma$ -chain receptor.

## Supplemental Figure 8

### Patient P671

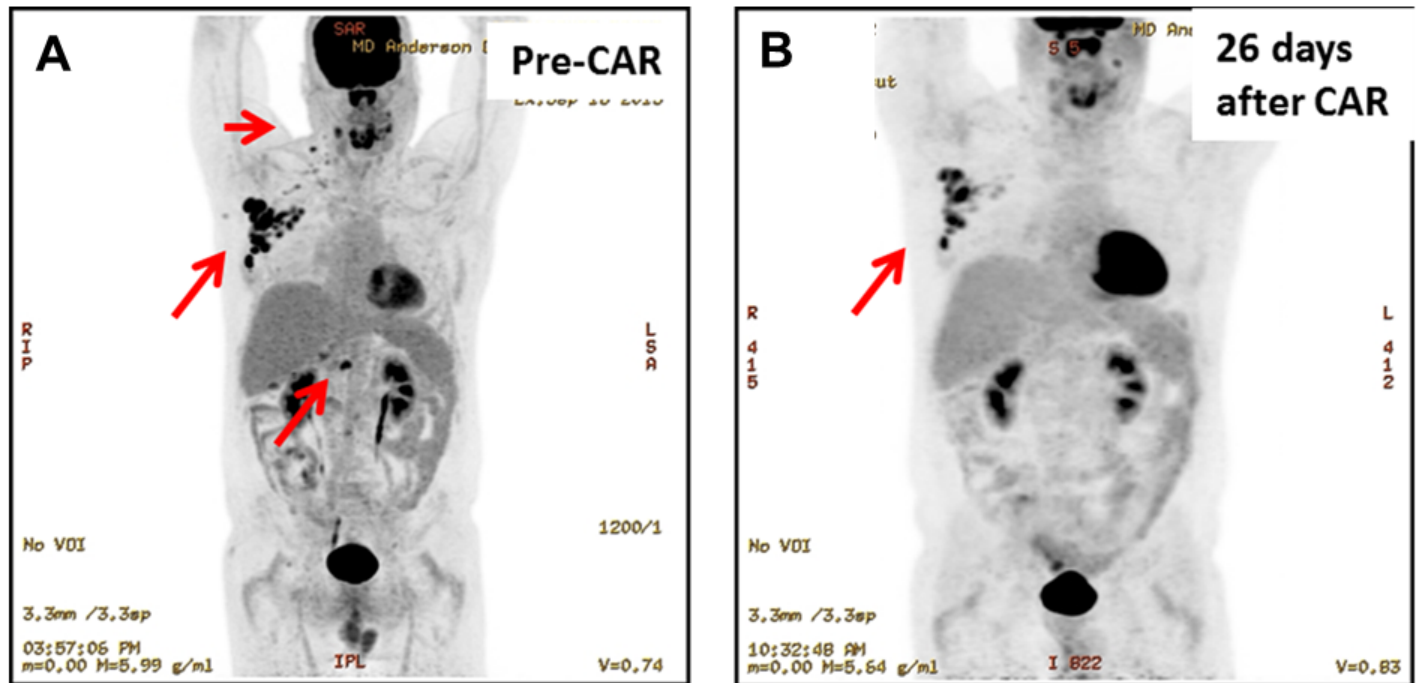

**Clinical responses to CAR T cells administered to patients with bulky disease.** A 52 year-old man (P671) with a history of follicular lymphoma transformed to DLBL in 2013. Prior to enrolling on this study, his treatment included rituximab plus CHOP x 6 followed by progression, rituximab-ifosfamide, carboplatin, and etoposide x 2 followed by progression, rituximab-DHAP x 2 followed by progression, and rituximab-hyperCytoxin and radiation therapy with partial response. At entrance to this study, he had bulky mesenteric disease that was refractory to chemotherapy. He received a haplo-identical donor HSCT from his son after conditioning with fludarabine, cyclophosphamide and total body irradiation. CAR T cells ( $10^7/m^2$ ) were infused 45 days after haplo-identical HSCT, and he had no aGVHD, cGVHD or complications, and was in a CR 6 months later with 100% donor chimerism. **(A)** In 2015 he relapsed in multiple LN: R/L axillae, neck and abdomen. Gray scale image shows SUV from PET scan; red arrows indicate areas of relapse. He was reinfused with  $5 \times 10^7$  CAR T cells without prior lymphodepletion or tumor cytoreduction. **(B)** Repeat PET scan one month after CAR T-cell infusion showed dramatic reduction in disease burden: clearance of tumor from all areas except right axilla, which showed a decrease in SUV from 13 to 7.9 with ongoing improvement.

Repeat right axilla FNA and core biopsy 2 months after CAR T-cell infusion revealed no evidence of NHL. Then, one month later, P671 was noted to have increased PET activity and received a third dose of haplo-identical donor-derived CAR T cells (also at  $5 \times 10^7$  T cells/m<sup>2</sup>) without prior lymphodepleting chemotherapy and again a reduction in PET activity was observed.

## SUPPLEMENTAL METHODS

### *T-cell manufacture in compliance with cGMP for phase I/II trials*

The CD19RCD28 transgene is a second-generation CAR that activates T cells via chimeric CD28 and CD3- $\zeta$ . After electroporation with the two supercoiled SB system DNA plasmids, the genetically modified T cells were selectively propagated in a CAR-dependent manner on  $\gamma$ -irradiated K-562 cells (expressing endogenous CD32) that had been genetically modified by transduction with lentivirus (in collaboration with Dr. Carl June at the University of Pennsylvania, Philadelphia, PA) and cloned (designated clone #4 (also known as CJK64.86.41BBL.GFP.IL-15.CD19), homogeneously co-expressing truncated CD19, CD64, CD86, CD137L (4-1BBL), and a membrane bound form of IL-15 as coexpressed with EGFP) by limiting dilution to function as AaPC. The AaPC were manufactured as a Master Cell Bank (MCB) by Production Assistance for Cellular Therapies (PACT) under the auspices of the National Heart, Lung, and Blood Institute (NHLBI, Bethesda, MD). Subsequently, a Working Cell Bank (WCB) of clone #4 was derived at MD Anderson. The AaPC from MCB/WCB were continuously propagated in a WAVE (GE Healthcare) for up to 65 days under standard operating procedures and then  $\gamma$ -irradiated (100 Gy using a Cesium source as described (38)) prior to cryopreservation. Thawed AaPC were added at 1:2 (CAR T cells to AaPC) every 7 to 10 days to selectively propagate CAR T cells as cultured in the presence of soluble recombinant human IL-2 (50 U/mL) and IL-21 (30 ng/mL) added on a Monday-Wednesday-Friday schedule (34, 38). The validation studies describing phenotype and function of the CAR T cells manufactured in compliance with cGMP have been published (34, 36-38). In the event of an overgrowth of CD3<sup>neg</sup>CD56<sup>+</sup> lymphocytes early in the culturing process, these cells were removed using a CD56-specific monoclonal antibody and paramagnetic selection (**Supplemental Table 2**). The electroporation and propagation of clinical-grade T cells occurred at MD Anderson in compliance with cGMP for Phase I/II trials. The release criteria, undertaken in compliance with Clinical Laboratory Improvement Amendments (CLIA), for the manufactured T cells are (1) sterility (bacteria, fungi, mycoplasma, endotoxin), (2) chain of custody

(low-resolution HLA class I typing), (3) phenotype (presence of T cells (1), presence of transgene [CAR expression], absence of AaPC [CD32 expression], and absence of B cells [CD19 expression]), (4) safety (absence of autonomous cell growth) following our described methods (38), and (5) viability. T cells from PBMC were mock electroporated (without SB DNA plasmids) as “no DNA control” and propagated by cross-linking CD3 by the every-7-day addition of AaPC clone #4 preloaded with CD3-specific mAb (clone OKT3) in the presence of IL-2 and 21 (38).

### ***Conditioning regimens for HSCT***

*Autologous trial:* The conditioning regimen (BEAM) began on day -6 with intravenous carmustine (300 mg/m<sup>2</sup>) infused over 2 hours, followed by etoposide (200 mg/m<sup>2</sup>) infused over 3 hours and cytarabine (200 mg/m<sup>2</sup>) infused over 1 hour, given every 12 hours for 8 doses on days -5 through -2, followed by melphalan (140 mg/m<sup>2</sup>) infused over 30 minutes on day -1. Autologous PBSC were infused on day 0, premedicating only with diphenhydramine. *Allogeneic trial:* the preparative regimen was at the discretion of the treating physician. GVHD prophylaxis consisted of tacrolimus (from day -2 through 180 days post-transplant) and mini-dose methotrexate (5 mg/m<sup>2</sup> administered on days 1, 3, 6 and 11 after infusion of PBSC) as described for patients after HLA-matched-sibling HSCT (44) and tacrolimus, mycophenolate mofetil and post-HSCT cyclophosphamide (50 mg/kg infused on day 3 and 4 after infusion of PBSC) after haplo-identical HSCT (45). GVHD prophylaxis was tapered and discontinued by 6 months after HSCT as feasible.

### ***Intravenous infusions of electroporated and propagated T cells***

*Autologous trial:* T cells were administered no sooner than 48 hours and no later than 5 days after PBSC infusion. *Allogeneic trial:* T cells were administered 6 to 12 weeks following infusion of PBSC, based on a median time to occurrence of acute GVHD of 6 weeks post HSCT. T cells were intravenously infused at MD Anderson by principal investigator or designee. Initially, to enhance patient safety, the cryopreserved T-cell products for both trials were split over two days, with 25% of the thawed product initially administered and the remaining T-cell dose infused no sooner than



24 hours and no later than 72 hours after completion of the first portion. After patient safety was established, the study was amended to allow for administration of the entire genetically modified T-cell product as a single administration. Patients were premedicated with acetaminophen and diphenhydramine, and blood pressure, oxygen saturation, and temperature monitored for 4 hours following the infusion. Systemic corticosteroids and other immunosuppressive agents were contraindicated. If an adverse event (AE) of grade >2 (common terminology criteria [CTC], version 4) occurred involving cardiopulmonary, hepatic (excluding albumin), gastrointestinal, neurological, or renal toxicity probably or definitely attributed to T-cell administration, the patient could then receive corticosteroids and additional immunosuppressive agents if needed.

### ***Quantitative PCR (Q-PCR) and droplet digital PCR (ddPCR) to measure T-cell persistence***

The measurement of CAR was reported as transgene copy number per  $\mu\text{g}$  of total PBMC genomic DNA. Additionally, the ddPCR system was employed to determine presence and quantification of CAR T cells in patient-derived PB after infusion. ddPCR is a platform designed to provide improved sensitivity and precision for the detection and quantitation of infrequent target DNA molecules (35). gDNA from *ex vivo* numerically expanded day 28 “no DNA” autologous control T cells (used as negative control) and CD19-specific CAR T cells (used as positive control), as well as gDNA from serially collected patient-derived PBMC after infusion of genetically modified T cells, were isolated using a commercially available kit (Qiagen). gDNA (50 ng) from each of positive and negative control and serially collected sample was used for ddPCR. PCR droplets were generated according to manufacturer's recommendations (Bio-Rad). Briefly, a 20  $\mu\text{l}$  of multiplex PCR mixture was prepared by mixing gDNA with the ddPCR 2x Master Mix and FAM labeled TaqMan primer/probe sets (CAR context sequence; 5'-TCTTTAGCTGCTCCGTGATGCACGAGGCCCTGCACAACCACTACACCCAGAAGAGCCTGTCCCTGAGCCTGGGCAAGATGTTCTGGGTGCTGGTcg-3') and the human HEX labeled house-keeping EIF2C1 gene (5'-GAGGGCTACTACCACCCGCTGGGGGGTGGGCGCGAGGTCTGGTTCGGCTTTCACCAGTCTGTG

CGCCCTGCCATGTGGAAGATGATGCTCAACATTGATGGTGAGTGGGGAGAGCTATGGAGC-3').

PCR droplets were generated in a DG8 cartridge (Bio-Rad, Hercules, CA) using the QX-100 droplet generator, where each 20  $\mu$ L PCR mixture was partitioned into approximately 20,000 nano-liter size droplets. PCR droplets were transferred into a 96-well PCR plate and sealed with foil. Standard PCR was performed with a Bio-Rad C1000 Thermal Cycler (95°C (60 sec), 40 cycles of 94°C (30 sec), 60°C (60 sec), 98°C (60 sec)). CAR DNA copy number was evaluated using the QX-100 Digital Droplet PCR system (Bio-Rad,). The PCR-positive and PCR-negative droplets for CAR and the eukaryotic initiation factor 2C1 (*EIF2C1*) reference gene were determined and template concentrations were calculated by Poisson analysis. CAR copy number was determined by normalizing CAR concentration to *EIF2C1* concentration. The formula used to determine transgene copy number/cell was:

$$\frac{Tg}{cell} = \left( \frac{[CAR]}{[EIF2C1]} - \frac{[neg]}{[EIF2C1]} \right) \times 2$$

Where [CAR], [EIF2C1], and [neg] are the concentrations of DNA from the CAR, EIF2C1, and negative control (the greater of the no DNA or baseline values) reactions.

### ***Linker-mediated PCR (LM-PCR)***

Briefly, genomic DNA was extracted from primary T cells using standard column purification methods. Genomic DNA was digested with *Bfal* and *NlaIII* separately to clone regions adjacent to the left and right sides of the transposon, respectively. After overnight digestion at 37°C, reactions were heat inactivated at 80°C for 20 minutes. Previously published linkers for the left and right sides were then prepared by annealing sense and antisense primers (71). The prepared linkers were then ligated overnight at 16°C to genomic DNA digested with the corresponding restriction enzyme. Ligated DNA was purified using Qiagen MinElute 96 UF Plates, following the manufacturer's instructions. Primary PCR was performed with an annealing temperature of 55°C for 30 cycles. The primary PCR reaction was then diluted 1:75 in water, and 1 $\mu$ L of this dilution was used for secondary PCR with Long-Range

Taq (Roche), applying an annealing temperature of 53°C for 35 cycles. The primers used for secondary PCR were barcoded and designed for Illumina sequencing; these have been published previously (71).

### ***Direct TCR expression analysis to quantify TCRV $\alpha$ and V $\beta$ gene expression***

Cellular lysate (equivalent to ~30,000 cells) from each of the unmodified (day 0) and CAR-modified T cells (day 28) were analyzed. Spearman's non parametric correlation was performed on normalized transcript counts, and if the correlation coefficient was greater than or equal to 0.8 ( $p \geq 0.8$ ) within the 95% confidence interval, then the two TCR repertoires were considered to be highly correlated.

### ***Telomere length analysis by fluorescence in situ hybridization and flow cytometry (Flow-FISH)***

Telomere length of the T cells was measured by using the DAKO Telomere PNA Kit/FITC for Flow Cytometry (DAKO) according to the manufacturer's instructions. Briefly, isolated cells and control cells (1301 cell line; ECACC catalogue no. 85112105) were mixed in equal measure in hybridization solution with or without FITC-labeled telomere PNA probe for 10 minutes at 82°C; hybridized overnight in the dark at room temperature; washed twice with wash solution at 40°C; resuspended in DNA staining solution containing propidium iodide and RNase A, and analyzed on a FACSCalibur flow cytometer (BD Biosciences). Relative telomere length (RTL) was determined by comparing NK cells with a CEM-1301 cell line in the following way:

$$RTL = \frac{(\text{GM FL1 sample cells with probe} - \text{GM FL1 sample cells without probe}) \times \text{DI of control cells}}{(\text{GM FL1 reference cells with probe} - \text{GM FL1 reference cells without probe}) \times \text{DI of sample cells}} \times 100$$

where GM is geometric means and DI is DNA index.

### ***Multi-parameter flow cytometry***

Multi-parameter flow cytometric analysis of different cell subsets was performed on banked samples. Four panels were used: the first panel had CD8-PB (cat# 558207), CD3-FITC (cat# 340042), CD4-PerCP-Cy5.5 (cat# 560650), CD19-PE-Cy7 (cat# 557835), CD20-APC-H7 (cat# 641396, BD Biosciences, CA) and LIVE/DEAD Fixable Aqua Dead Cell Stain (cat# L34957, Life Technologies,

NY). Panel 2 had CD3-AmCyan (cat# 339186), CD8-PerCP-Cy5.5 (cat# 341051), CD27-PE-Cy7 (cat# 560609), CD45RA-APC-H7 (cat# 560674), CD28-PE (cat# 555729), CD62L-V450 (cat# 560440), and CCR7-AF-647 (cat# 353217, BD Biosciences, CA). Panel 3 had PD1 (CD279)-BV421 (cat# 562516), PDL1 (CD274)-PE-Cy7 (cat# 558017), BTLA (CD272)-PE (cat# 558485), CD8-APC (cat# 340584), HLA-DR-APC-Cy7 (cat# 335796, BD Biosciences, CA), TIM3-PerCP-eFluor710 (cat# 46-3109-41, eBioscience, CA) and LIVE/DEAD Fixable Aqua Dead Cell Stain. The last panel had CD122 (IL-2R $\beta$ )-BV510 (cat# 563093), CD132 (IL2R $\gamma$ )-BV421 (cat# 562881), CD215 (IL-15R $\alpha$ )-PE (cat# 330208), CD3-PerCP-Cy5.5 (cat# 340949), CD360 (IL-21R)-APC (cat# 460331), CD127 (IL-7R $\alpha$ )-PE-Cy7 (cat# 560822) and CD8-APC-Cy7 (cat# 34879, BD Biosciences, CA). Acquisition was performed on a FACS Canto II (BD Biosciences, CA) and all analyses were carried with the software FlowJo (Tree Star, OR).

### ***Assay to assess for unwanted autonomous growth***

To monitor aberrant T-cell growth (as part of the release criteria),  $2 \times 10^5$  CAR T cells, harvested after four  $\gamma$ -irradiated AaPC-mediated stimulation cycles (28 days after electroporation) were cultured in triplicate in a 24-well tissue culture plate for an additional 18 days. Positive control: cells were cultured in the presence of  $\gamma$ -irradiated AaPC at ratio of 1:2 (CAR T cell: AaPC) and cytokines (50 U/mL IL-2 and 30 ng/mL IL-21), as described (38). Experimental: cells were cultured in the absence of AaPC and cytokines. The assay was passed when total viable genetically modified cells at day 18 were (i)  $>2 \times 10^5$  T cells cultured with AaPC and cytokines as well as (ii)  $<2 \times 10^4$  cells T cells cultured without AaPC and cytokines.
